# Supplementary material for: Design, synthesis and biological evaluation of 1,2,3-triazole based 2-aminobenzimidazoles as novel inhibitors of LasR dependent quorum sensing in Pseudomonas aeruginosa
Source: Royal Society of Chemistry journal article supplement (doi:10.1039/c9ra05059k), 2019-01-01

**Design, synthesis and biological evaluation of 1,2,3-triazole based 2-aminobenzimidazoles as novel inhibitors of LasR dependent Quorum Sensing in *Pseudomonas aeruginosa***

**Singireddi Srinivasarao,<sup>[a]</sup> Adinarayana Nandikolla,<sup>[a]</sup> Shashidhar Nizalapur,<sup>[b]</sup> Tsz Tin Yu,<sup>[b]</sup> Sravani Pulya,<sup>[c]</sup> Balaram Ghosh,<sup>[c]</sup> Sankaranarayanan Murugesan,<sup>[d]</sup> Naresh Kumar,<sup>[b]</sup> and Kondapalli Venkata Gowri Chandra Sekhar\*<sup>[a]</sup>**

<sup>a</sup>*Department of Chemistry, Birla Institute of Technology and Science, Pilani, Hyderabad Campus, Jawahar Nagar, Kapra Mandal, Hyderabad – 500078, Telangana, India.*

<sup>b</sup>*School of Chemistry, UNSW Sydney, NSW 2052, Australia.*

<sup>c</sup>*Department of Pharmacy, Birla Institute of Technology and Science, Pilani, Hyderabad Campus, Jawahar Nagar, Kapra Mandal, Hyderabad-500 078, Telangana, India.*

<sup>d</sup>*Medicinal Chemistry Research Laboratory, Department of Pharmacy, Birla Institute of Technology and Science, Pilani, 333031, India.*

| <b>Contents:</b>                                    | <b>Page</b> |
|-----------------------------------------------------|-------------|
| 1. Materials and methods                            | S2          |
| 2. General procedures and Spectral Data             | S2          |
| 3. Single Crystal data                              | S5          |
| 4. <sup>1</sup> H and <sup>13</sup> C NMR spectra's | S8          |
| 5. Mass spectra's                                   | S46         |

---

\*Corresponding author

Tel.: +91 40 66303527 E-mail: kvgc@hyderabad.bits-pilani.ac.in; kvgs.bits@gmail.com

## Experimental section

### *1. Materials and methods*

All chemical reagents and solvents are purchased from Aldrich, Alfa Aesar, Finar. The solvents and reagents were of LR grade. All the solvents were dried and distilled before use. Thin-layer chromatography (TLC) was carried out on aluminium-supported silica gel plates (Merck 60 F254) with visualization of components by UV light (254 nm). Column chromatography was carried out on silica gel (Merck 100-200 mesh). <sup>1</sup>H NMR and <sup>13</sup>C NMR spectra were recorded at 400 MHz and 101 MHz respectively using a Bruker AV 400 spectrometer (Bruker CO., Switzerland) in CDCl<sub>3</sub> and DMSO-*d*<sub>6</sub> solution with tetramethylsilane as the internal standard and chemical shift values ( $\delta$ ) were given in ppm. <sup>1</sup>H NMR spectra were recorded in CDCl<sub>3</sub> or DMSO-*d*<sub>6</sub>. The following abbreviations are used to designate multiplicities: s = singlet, d = doublet, t = triplet, m = multiplet, br = broad. Melting

points were determined on an electro thermal melting point apparatus (Stuart-SMP30) in open capillary tubes and are uncorrected. Elemental analyses were performed by Elementar Analysensysteme GmbH vario MICRO cube CHN Analyzer. Mass spectra (ESI-MS) were recorded on Shimadzu MS/ESI mass spectrometer.

## 2. General Procedure and Spectral Data

*N*-(1*H*-benzo[d]imidazol-2-yl)-2-chloroacetamide (**3a**): A stirred solution of 1*H*-benzo[d]imidazol-2-amine (**2a**) (1 g, 7.51 mmol) and pyridine (1.51 mL, 18.76 mmol) in dichloromethane was cooled to 0 °C and chloroacetyl chloride (0.60 mL, 7.51 mmol) was added and stirred for 12h at rt. Once completion of the reaction, as indicated by TLC, the reaction mixture was washed with water and organic layer was dried over sodium sulphate, concentrated under reduced pressure and the crude residue was purified by column chromatography using 60-75% ethyl acetate in hexane as eluents to get compound **3a** (1.3 g, 83%) as White solid. ESI-MS: (*m/z*) calcd for C<sub>9</sub>H<sub>8</sub>ClN<sub>3</sub>O: 209.63, found 210.15 (M+H)<sup>+</sup>. <sup>1</sup>H NMR (400 MHz, DMSO-*d*<sub>6</sub>) δ 12.08 (s, 2H), 7.09-7.46 (m, 4H), 4.37 (s, 2H) <sup>13</sup>C NMR (100 MHz, CDCl<sub>3</sub>) 167.70, 147.43, 135.76, 121.98, 114.34, 43.92; Anal. calcd for C<sub>16</sub>H<sub>13</sub>ClN<sub>2</sub>O: (%) C, 51.56; H, 3.85; Cl, 16.91; N, 20.04; O, 7.63 Found: C, 51.61; H, 3.81; Cl, 16.94; N, 20.00; O, 7.59.

2-chloro-*N*-(5,6-dimethyl-1*H*-benzo[d]imidazol-2-yl)acetamide (**3b**): A stirred solution of 5,6-dimethyl-1*H*-benzo[d]imidazol-2-amine (**2b**) (1 g, 6.21 mmol) and pyridine (1.25 mL, 15.52 mmol) in dichloromethane was cooled to 0 °C and chloroacetyl chloride (0.49 mL, 6.21 mmol) was added and stirred for 12 h at rt. Once completion of the reaction, as indicated by TLC, the reaction mixture was washed with water and organic layer was dried over sodium sulphate, concentrated under reduced pressure and the crude residue was purified by column chromatography using 60 % ethyl acetate in hexane as eluents to get compound **3b** (1.1 g, 75%) as White solid. ESI-MS: (*m/z*) calcd for C<sub>11</sub>H<sub>12</sub>ClN<sub>3</sub>O: 237.69, found 238.20 (M+H)<sup>+</sup>. <sup>1</sup>H NMR (400 MHz, DMSO-*d*<sub>6</sub>) δ 12.07 (s, 2H), 7.16 (s, 2H), 4.38 (s, 2H), 2.25 (s, 6H) <sup>13</sup>C NMR (100 MHz, CDCl<sub>3</sub>) 167.49, 147.38, 135.37, 121.08, 113.99,

43.85, 20.07; Anal. calcd for C<sub>11</sub>H<sub>12</sub>ClN<sub>3</sub>O: (%) C, 55.59; H, 5.09; Cl, 14.92; N, 17.68; O, 6.73 Found: C, 55.70; H, 5.01; Cl, 14.87; N, 17.68; O, 6.75.

*N*-(1*H*-benzo[*d*]imidazol-2-yl)-2-iodoacetamide (**4a**): KI (1.24 g, 7.46 mmol) was added to the stirred solution of compound **3a** (1.3 g, 6.22 mmol) in acetone:water (8:2 ratio, should get clear solution) and heated to 55 °C for 12 h. Once completion of the reaction, as indicated by TLC the reaction mixture, acetone was removed from the reaction mixture and washed with water and organic layer was dried over sodium sulphate, concentrated under reduced pressure and the crude residue was titrated with 3% dichloromethane in hexane to yield compound **4a** (1.5 g, 80%) as off-white solid. The solid compound was directly taken to next step without further purification. ESI-MS: (*m/z*) calcd for C<sub>9</sub>H<sub>8</sub>IN<sub>3</sub>O: 301.08, found 300.15 (M+H). <sup>1</sup>H NMR (400 MHz, DMSO-*d*<sub>6</sub>) δ 11.98 (s, 2H), 7.15-7.36 (m, 4H), 4.01 (s, 2H) <sup>13</sup>C NMR (100 MHz, CDCl<sub>3</sub>) 165.13, 147.42, 134.97, 121.87, 114.30, 29.04; Anal. calcd for C<sub>9</sub>H<sub>8</sub>IN<sub>3</sub>O: (%) C, 35.90; H, 2.68; I, 42.15; N, 13.96; O, 5.31 Found: C, 35.97; H, 2.65; I, 42.18; N, 13.99; O, 5.28.

*N*-(5,6-dimethyl-1*H*-benzo[*d*]imidazol-2-yl)-2-iodoacetamide (**4b**): KI (0.92 g, 5.56 mmol) was added to the stirred solution of compound **3b** (1.1 g, 4.64 mmol) in acetone:water (8:2 ratio, should get clear solution) and heated to 50 °C for 12 h. Once completion of the reaction, as indicated by TLC, acetone was removed from the reaction mixture and washed with water and organic layer was dried over sodium sulphate, concentrated under reduced pressure and the crude residue was titrated with 3% dichloromethane in hexane to yield compound **4b** (1.1 g, 72%) as white solid. The solid compound was directly taken to next step without further purification. ESI-MS: (*m/z*) calcd for C<sub>11</sub>H<sub>12</sub>IN<sub>3</sub>O: 329.14, found 330.15 (M+H). <sup>1</sup>H NMR (400 MHz, DMSO-*d*<sub>6</sub>) δ 12.03 (s, 2H), 7.11 (s, 2H), 4.05 (s, 2H), 2.31 (s, 6H) <sup>13</sup>C NMR (100 MHz, CDCl<sub>3</sub>) 165.45, 147.75, 135.12, 121.844, 114.36,

22.28; Anal. calcd for C<sub>11</sub>H<sub>12</sub>IN<sub>3</sub>O: (%) C, 40.14; H, 3.67; I, 38.56; N, 12.77; O, 4.86 Found: C, 40.21; H, 3.64; I, 38.55; N, 12.73; O, 4.87.

**2-azido-N-(1H-benzo[d]imidazol-2-yl)acetamide (5a):** NaN<sub>3</sub> (0.49 g, 7.47 mmol) was added to the stirred solution of compound **4a** (1.5g, 4.98 mmol) in DMF:H<sub>2</sub>O (8:2) mixture and heated to 110 °C for 20 h. Once completion of the reaction, as indicated by TLC, the reaction mixture was transferred into water. The precipitated product was filtered to yield compound **5a** (0.8 g, 75%) as off-white solid. ESI-MS: (*m/z*) calcd for C<sub>9</sub>H<sub>8</sub>N<sub>6</sub>O: 216.20, found 215.20 (M+H). <sup>1</sup>H NMR (400 MHz, DMSO-*d*<sub>6</sub>) δ 12.06 (s, 2H), 7.12-7.61 (m, 4H), 3.89 (s, 2H) <sup>13</sup>C NMR (100 MHz, CDCl<sub>3</sub>) 166.74, 147.67, 135.49, 122.53, 114.39, 50.51; Anal. calcd for C<sub>9</sub>H<sub>8</sub>N<sub>6</sub>O: (%) C, 50.00; H, 3.73; N, 38.87; O, 7.40 Found: C, 50.00; H, 3.73; N, 38.87; O, 7.40.

**2-azido-N-(5,6-dimethyl-1H-benzo[d]imidazol-2-yl)acetamide (5b):** NaN<sub>3</sub> (0.49 g, 7.47 mmol) was added to the stirred solution of compound **4b** (1.1 g, 4.98 mmol) in DMF:H<sub>2</sub>O (8:2) mixture and heated to 110 °C for 20 h. Once completion of the reaction, as indicated by TLC, the reaction mixture was transferred into water. The precipitated product was filtered to yield compound **5b** (0.6 g, 74%) as off-white solid. ESI-MS: (*m/z*) calcd for C<sub>11</sub>H<sub>12</sub>N<sub>6</sub>O: 244.25, found 245.20 (M+H). <sup>1</sup>H NMR (400 MHz, DMSO-*d*<sub>6</sub>) δ 12.08 (s, 2H), 7.19 (s, 2H), 4.31 (s, 2H), 2.26 (s, 6H) <sup>13</sup>C NMR (100 MHz, CDCl<sub>3</sub>) 166.44, 147.76, 135.41, 121.25, 113.79, 43.98, 20.14; Anal. calcd for C<sub>11</sub>H<sub>12</sub>N<sub>6</sub>O: (%) C, 54.09; H, 4.95; N, 34.41; O, 6.55 Found: C, 54.20; H, 4.93; N, 34.42; O, 6.65.

### **3. Single Crystal data**

#### *Single Crystal X-ray Crystallographic Structure of Compound 6d:*

Crystallographic data for the compound **6d** have been deposited to the Cambridge Crystallographic Data Center and corresponding deposition number is **CCDC 1904042**.

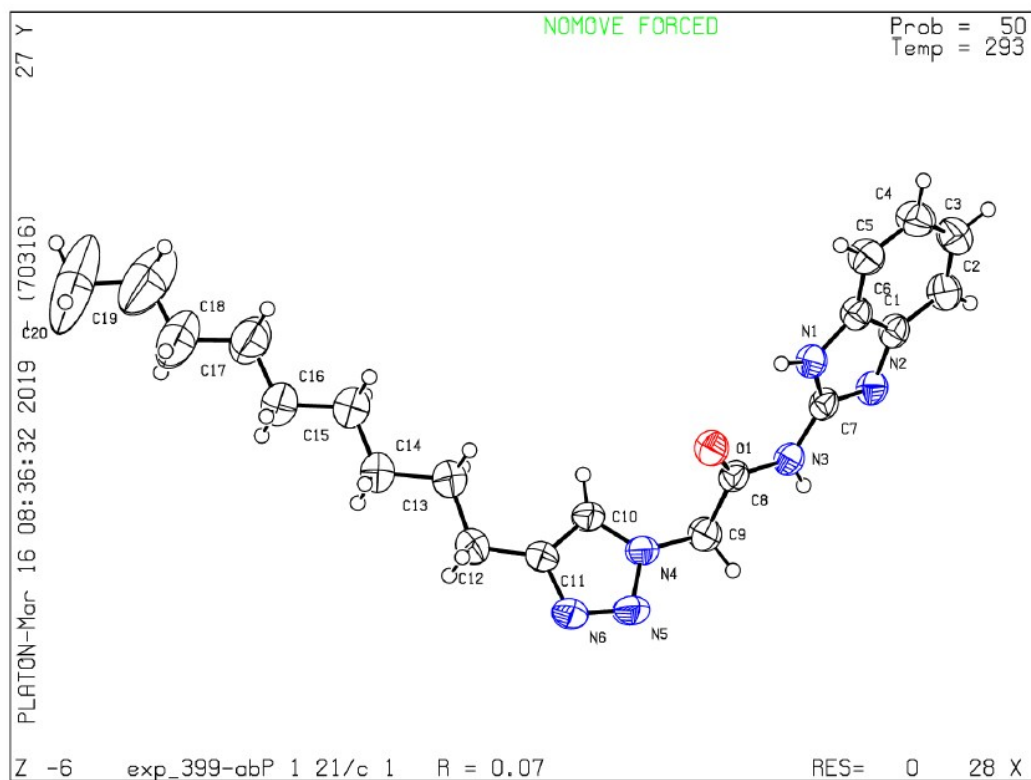

ORTEP crystal structure diagram of compound **6d**

Table of Crystal data and structure refinement for **6d**

|                     |                                                  |
|---------------------|--------------------------------------------------|
| Identification code | <b>6d</b> (exp_399-AB-4R )                       |
| Empirical formula   | C <sub>20</sub> H <sub>28</sub> N <sub>6</sub> O |
| Formula weight      | 368.48                                           |
| Temperature/K       | 293(2)                                           |
| Crystal system      | monoclinic                                       |
| Space group         | P2 <sub>1</sub> /c                               |

|                                             |                                                                |
|---------------------------------------------|----------------------------------------------------------------|
| a/Å                                         | 18.8646(7)                                                     |
| b/Å                                         | 5.4019(2)                                                      |
| c/Å                                         | 20.0357(6)                                                     |
| $\alpha$ /°                                 | 90                                                             |
| $\beta$ /°                                  | 90.614(3)                                                      |
| $\gamma$ /°                                 | 90                                                             |
| Volume/Å <sup>3</sup>                       | 2041.61(12)                                                    |
| Z                                           | 4                                                              |
| $\rho_{\text{calc}}$ /g/cm <sup>3</sup>     | 1.199                                                          |
| $\mu$ /mm <sup>-1</sup>                     | 0.619                                                          |
| F(000)                                      | 792.0                                                          |
| Crystal size/mm <sup>3</sup>                | 0.5 × 0.02 × 0.01                                              |
| Radiation                                   | CuK $\alpha$ ( $\lambda$ = 1.54184)                            |
| 2 $\Theta$ range for data collection/°      | 8.828 to 159.794                                               |
| Index ranges                                | -23 ≤ h ≤ 23, -6 ≤ k ≤ 3, -23 ≤ l ≤ 25                         |
| Reflections collected                       | 10329                                                          |
| Independent reflections                     | 4308 [ $R_{\text{int}}$ = 0.0482, $R_{\text{sigma}}$ = 0.0635] |
| Data/restraints/parameters                  | 4308/0/245                                                     |
| Goodness-of-fit on F <sup>2</sup>           | 1.063                                                          |
| Final R indexes [ $I \geq 2\sigma(I)$ ]     | $R_1$ = 0.0671, $wR_2$ = 0.1867                                |
| Final R indexes [all data]                  | $R_1$ = 0.0834, $wR_2$ = 0.2036                                |
| Largest diff. peak/hole / e Å <sup>-3</sup> | 0.42/-0.27                                                     |

---

#### 4. $^1\text{H}$ and $^{13}\text{C}$ NMR spectra's

$^1\text{H}$  and  $^{13}\text{C}$  NMR spectra's of represented final compounds:

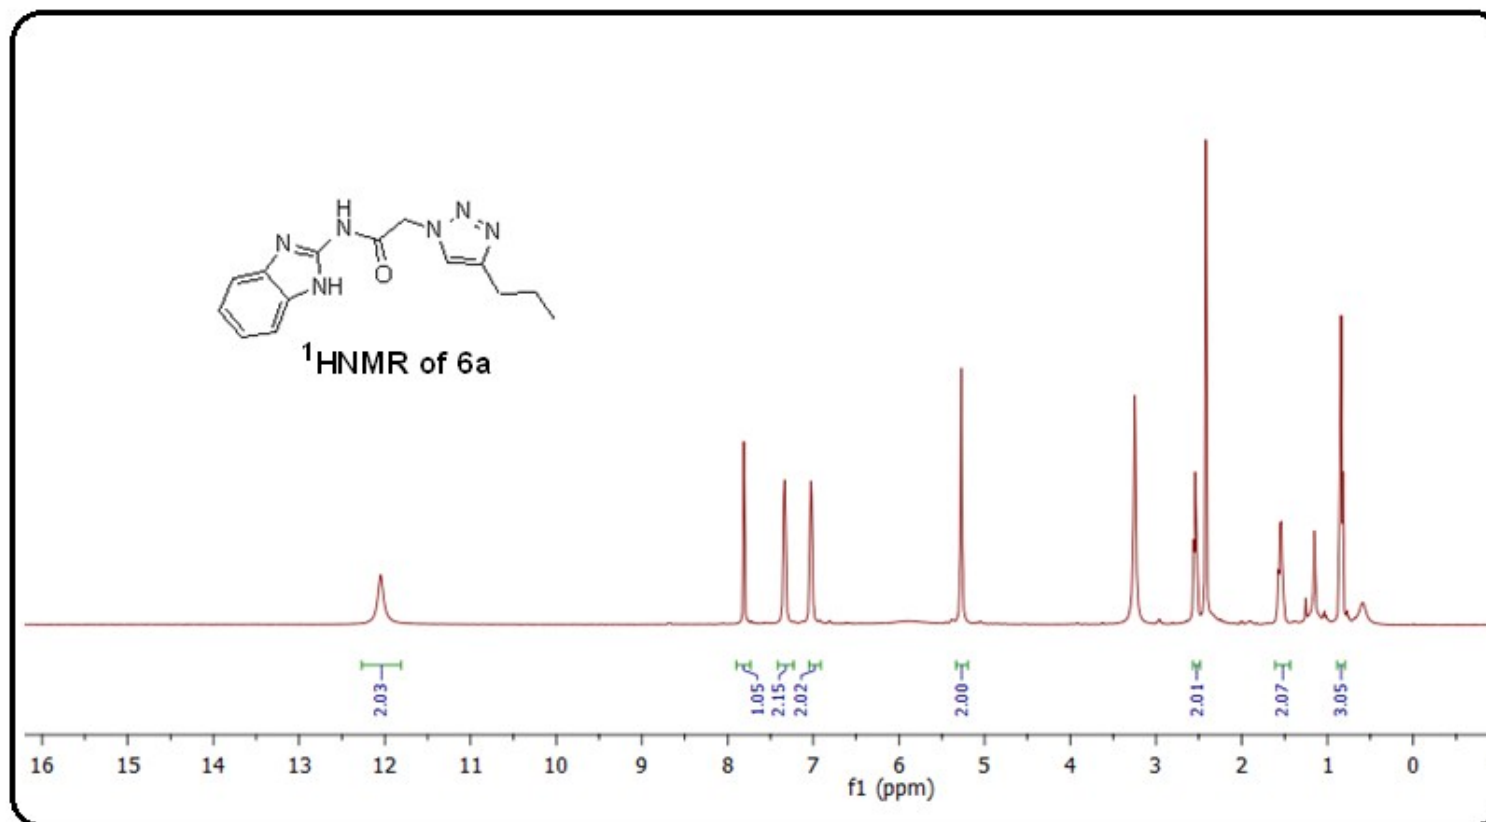

$^1\text{HNMR}$  of 6a



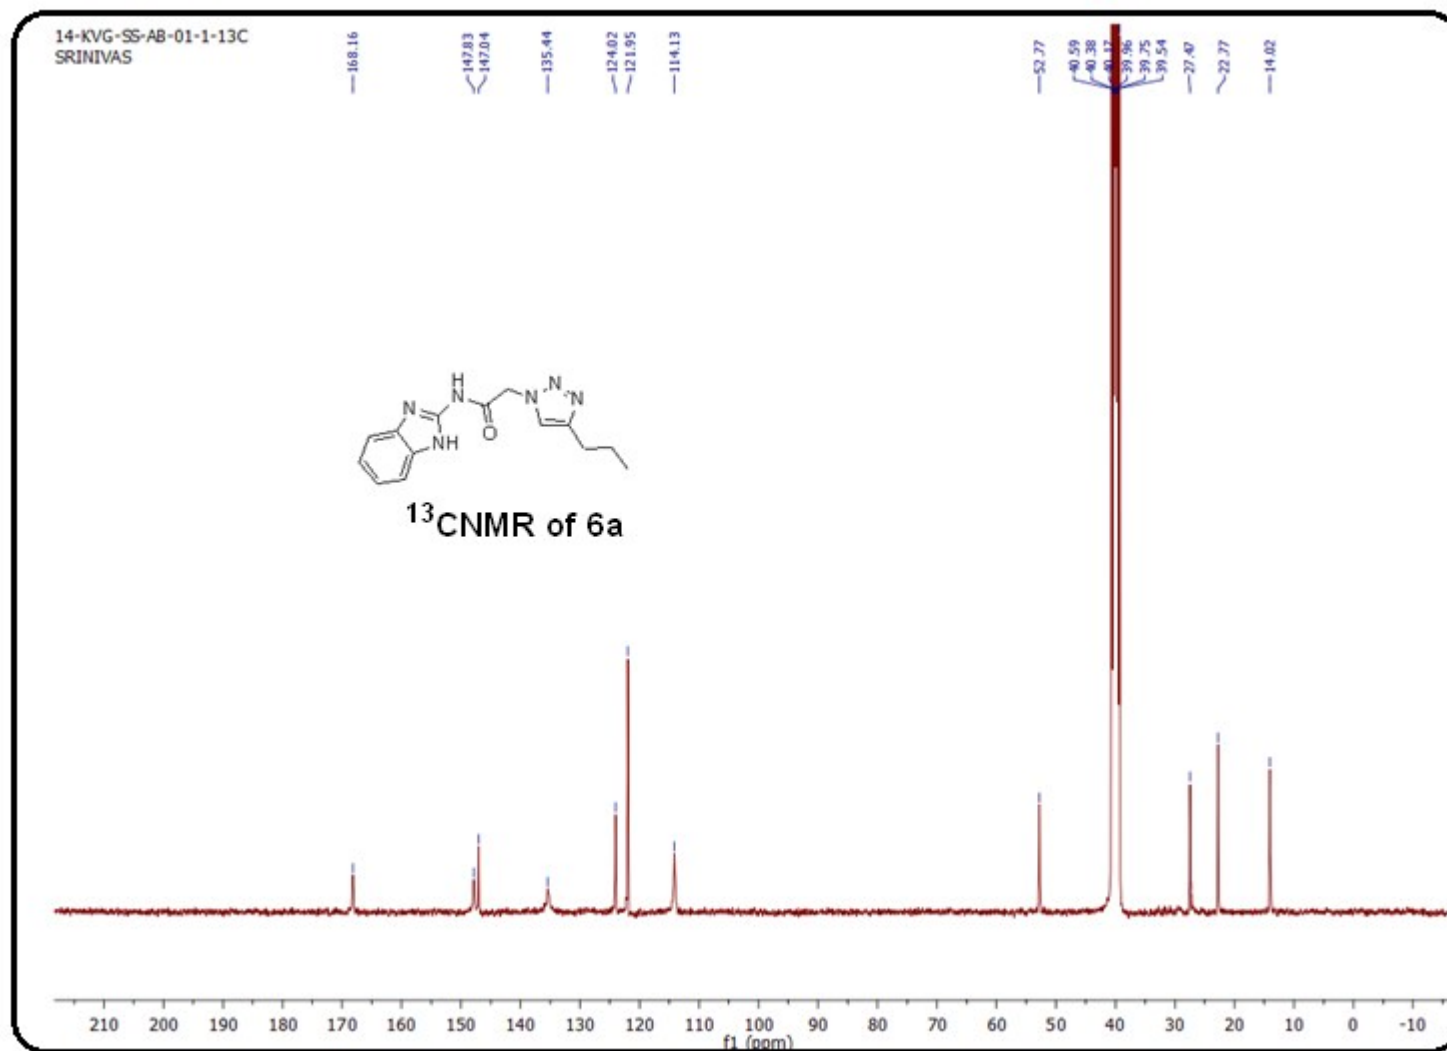

<sup>13</sup>CNMR of 6a

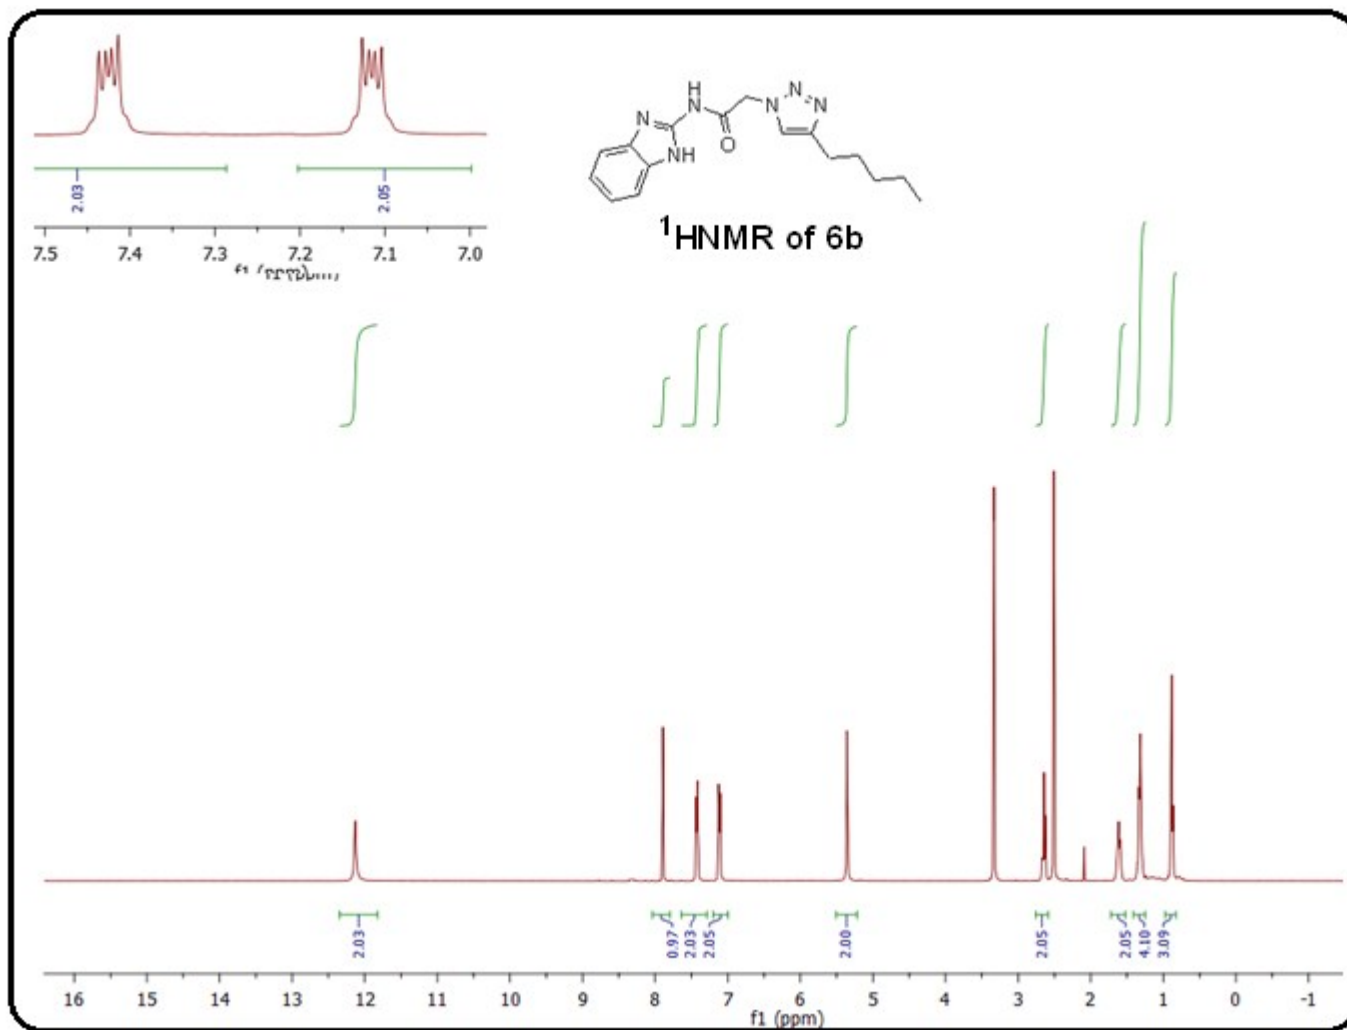

<sup>1</sup>H NMR of **6b**

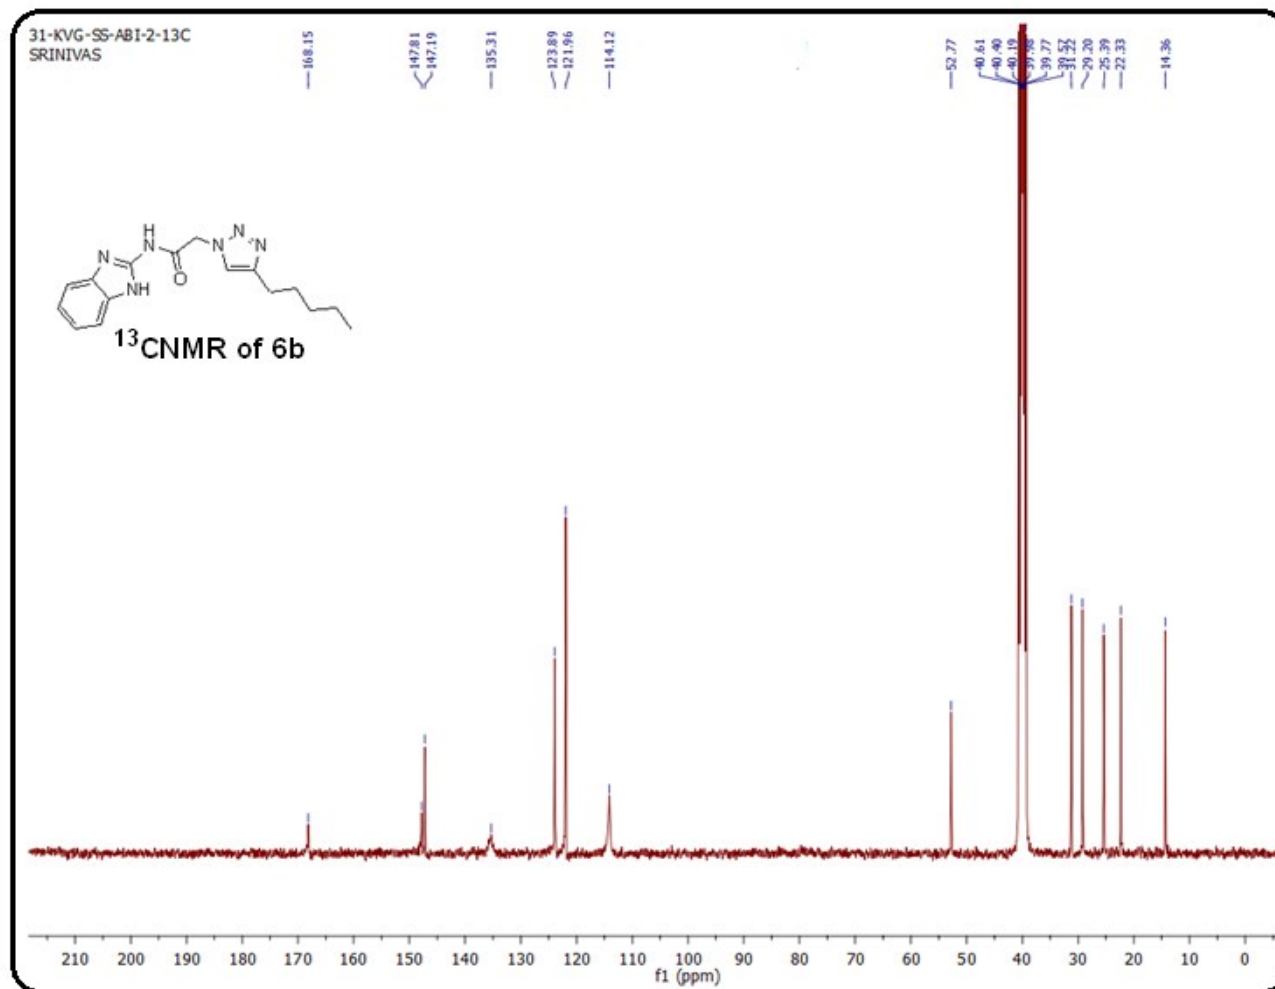

<sup>13</sup>CNMR of **6b**

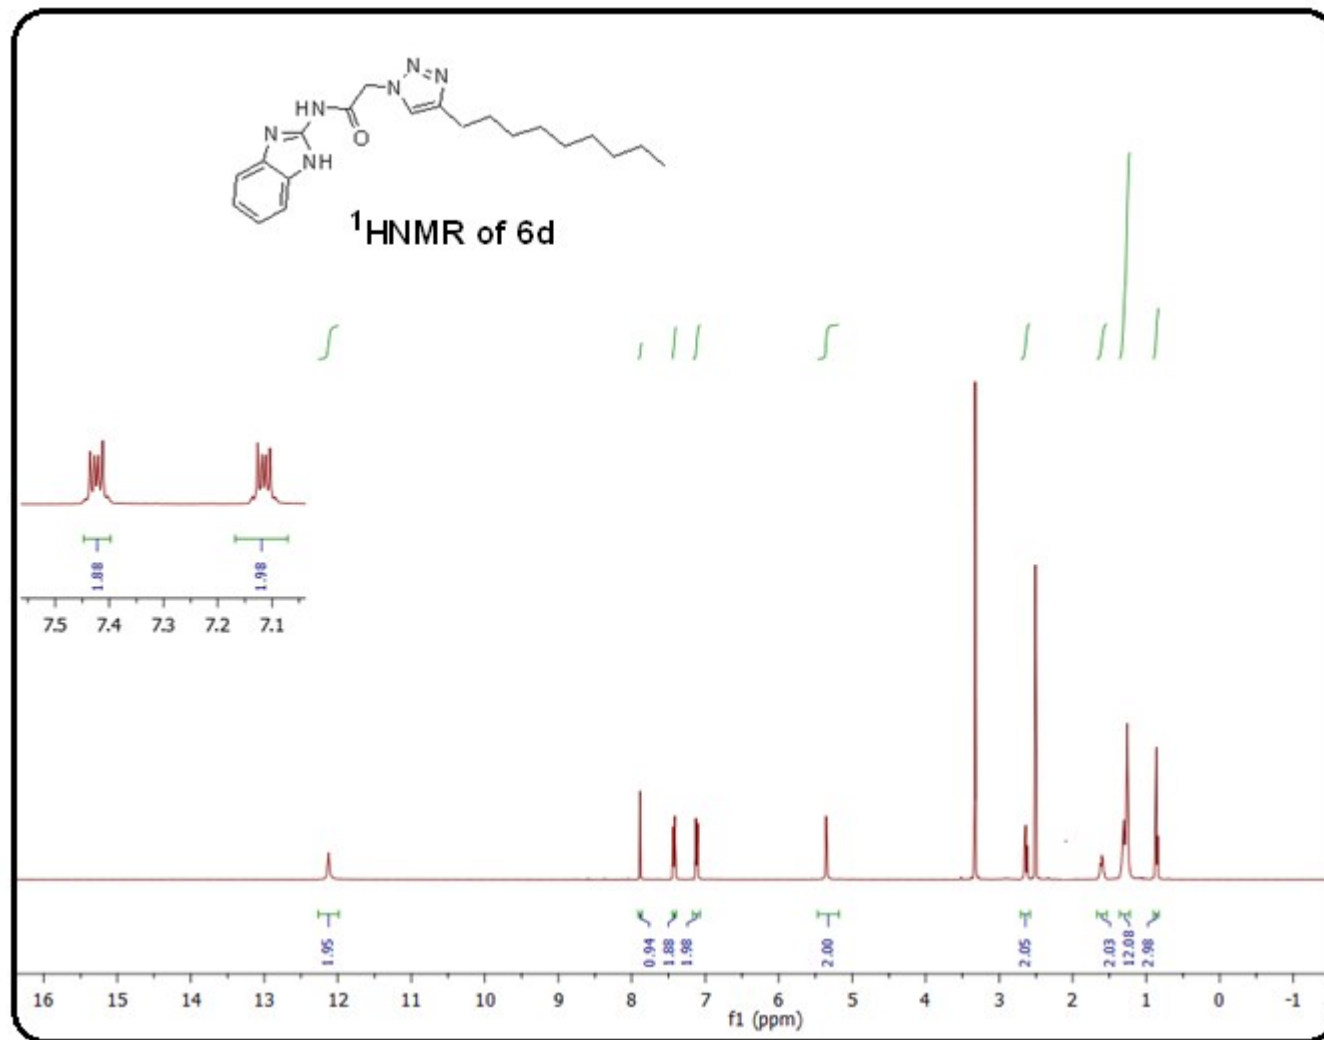

**<sup>1</sup>H NMR of 6d**

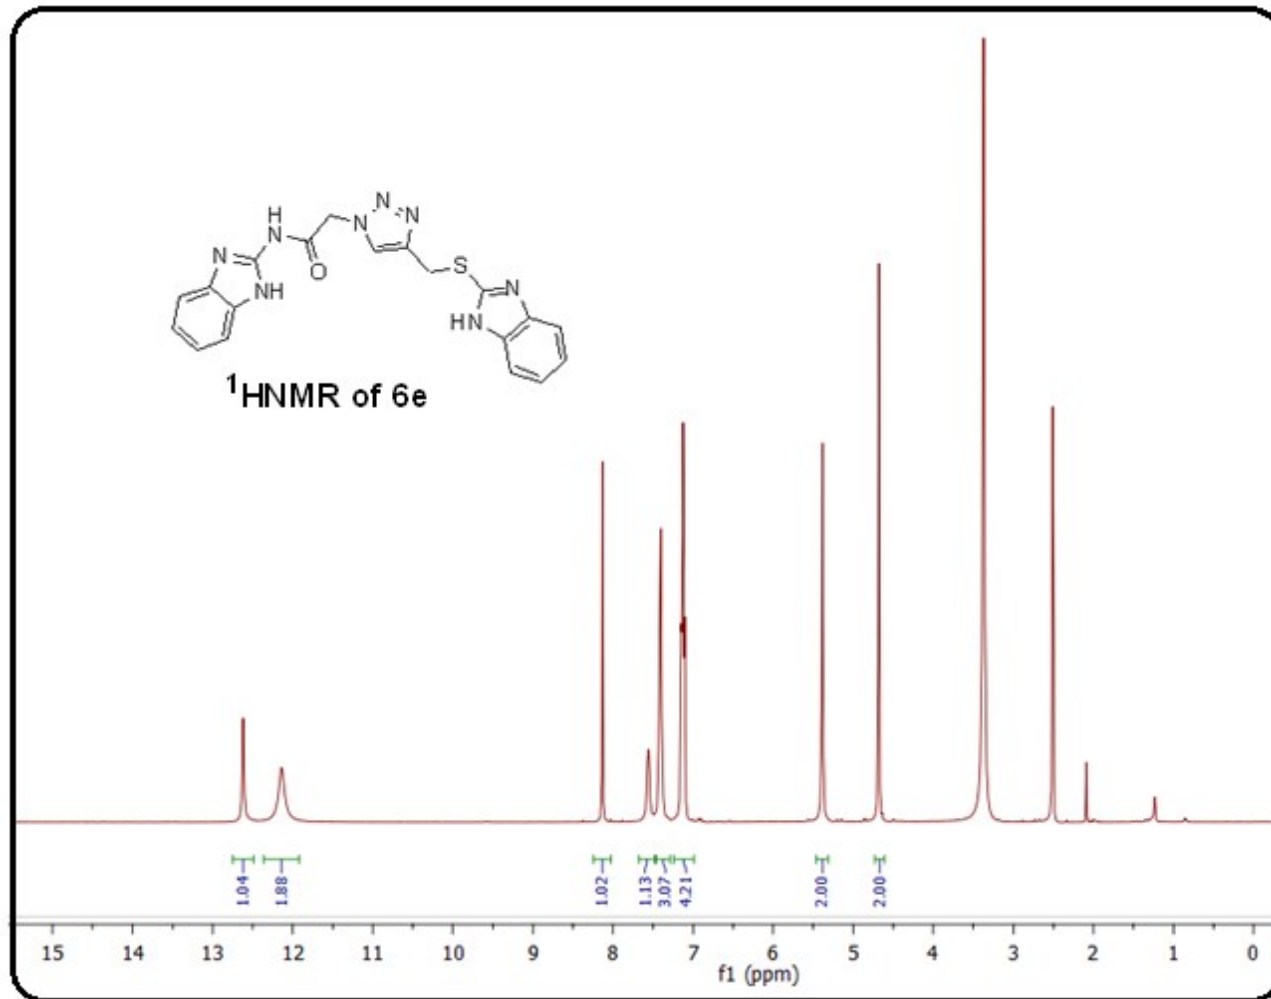

<sup>1</sup>HNMR of 6e

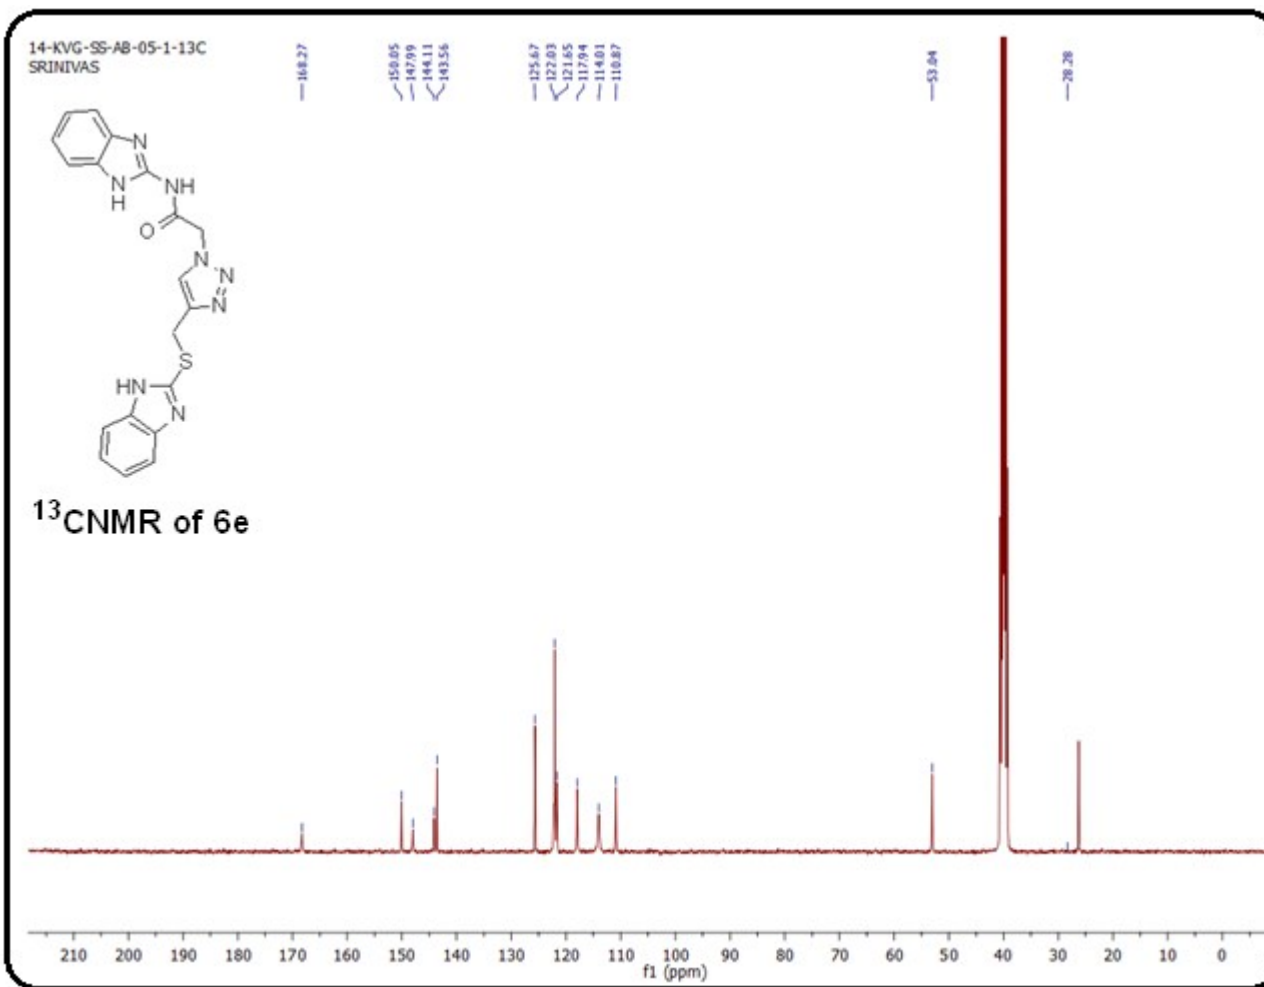

<sup>13</sup>CNMR of 6e

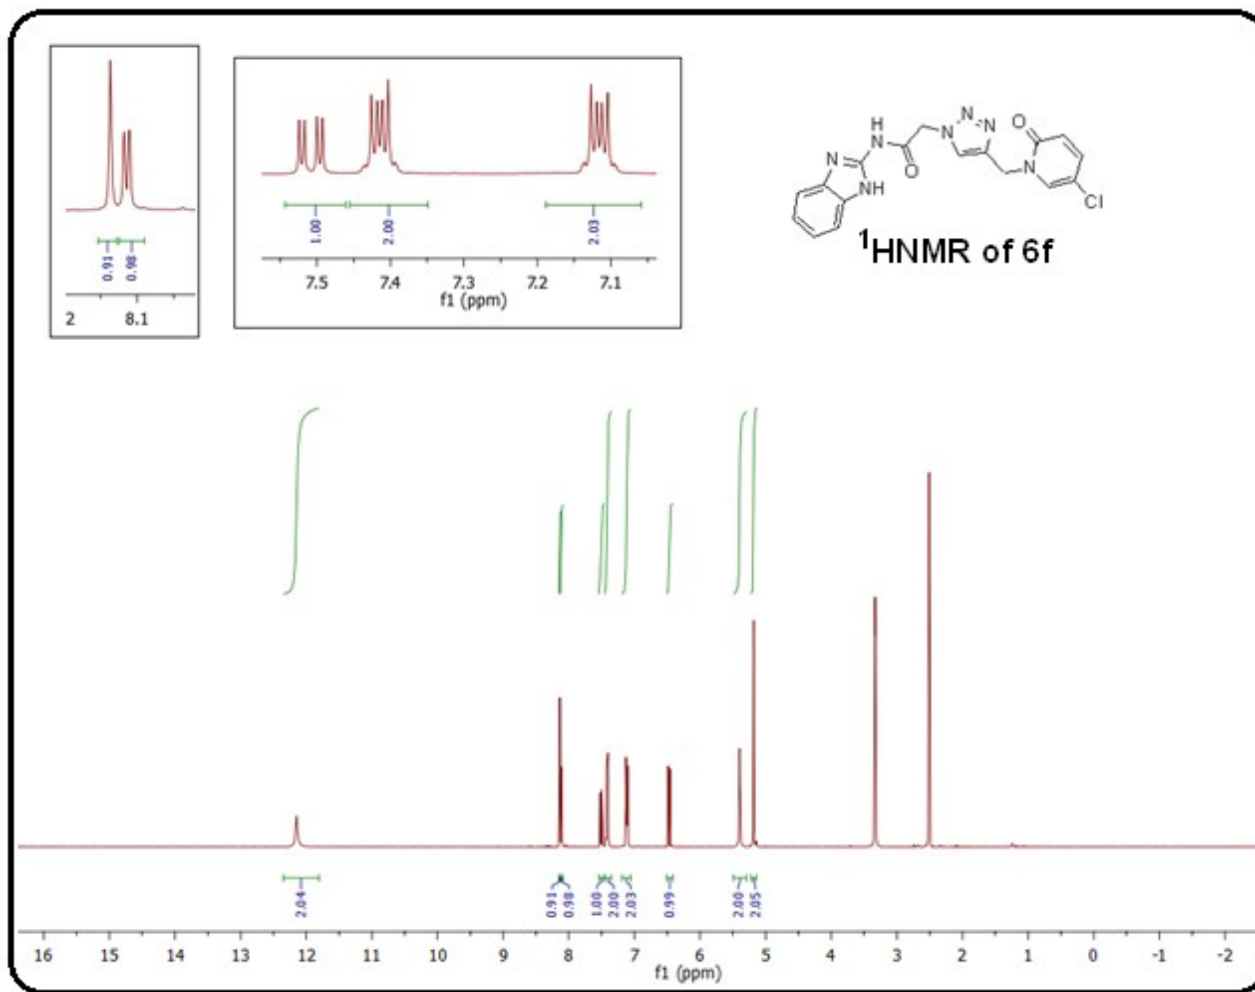

**<sup>13</sup>C NMR of 6f**

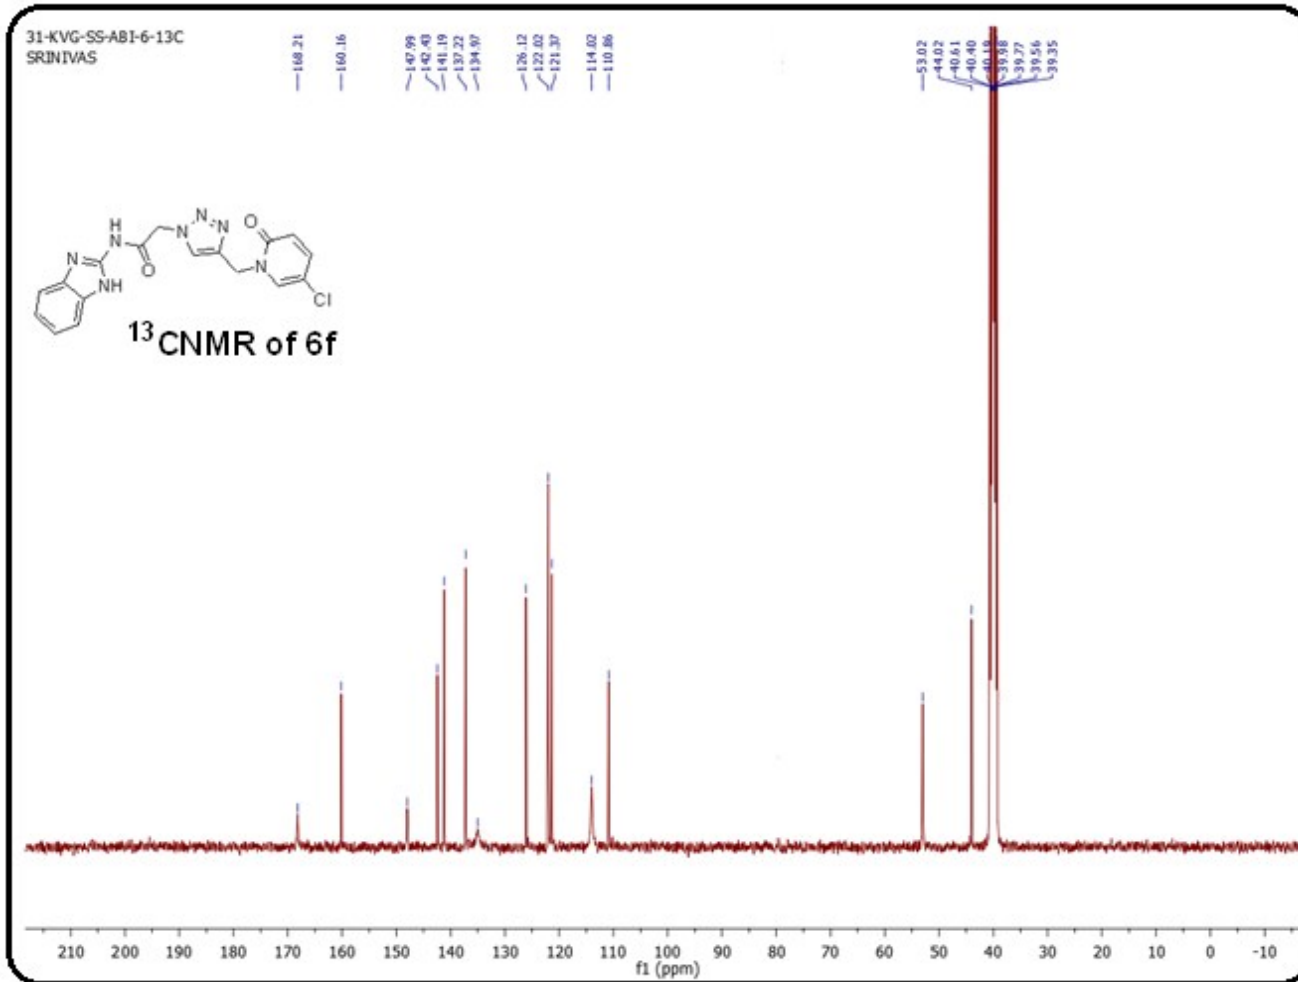

<sup>13</sup>CNMR of 6f



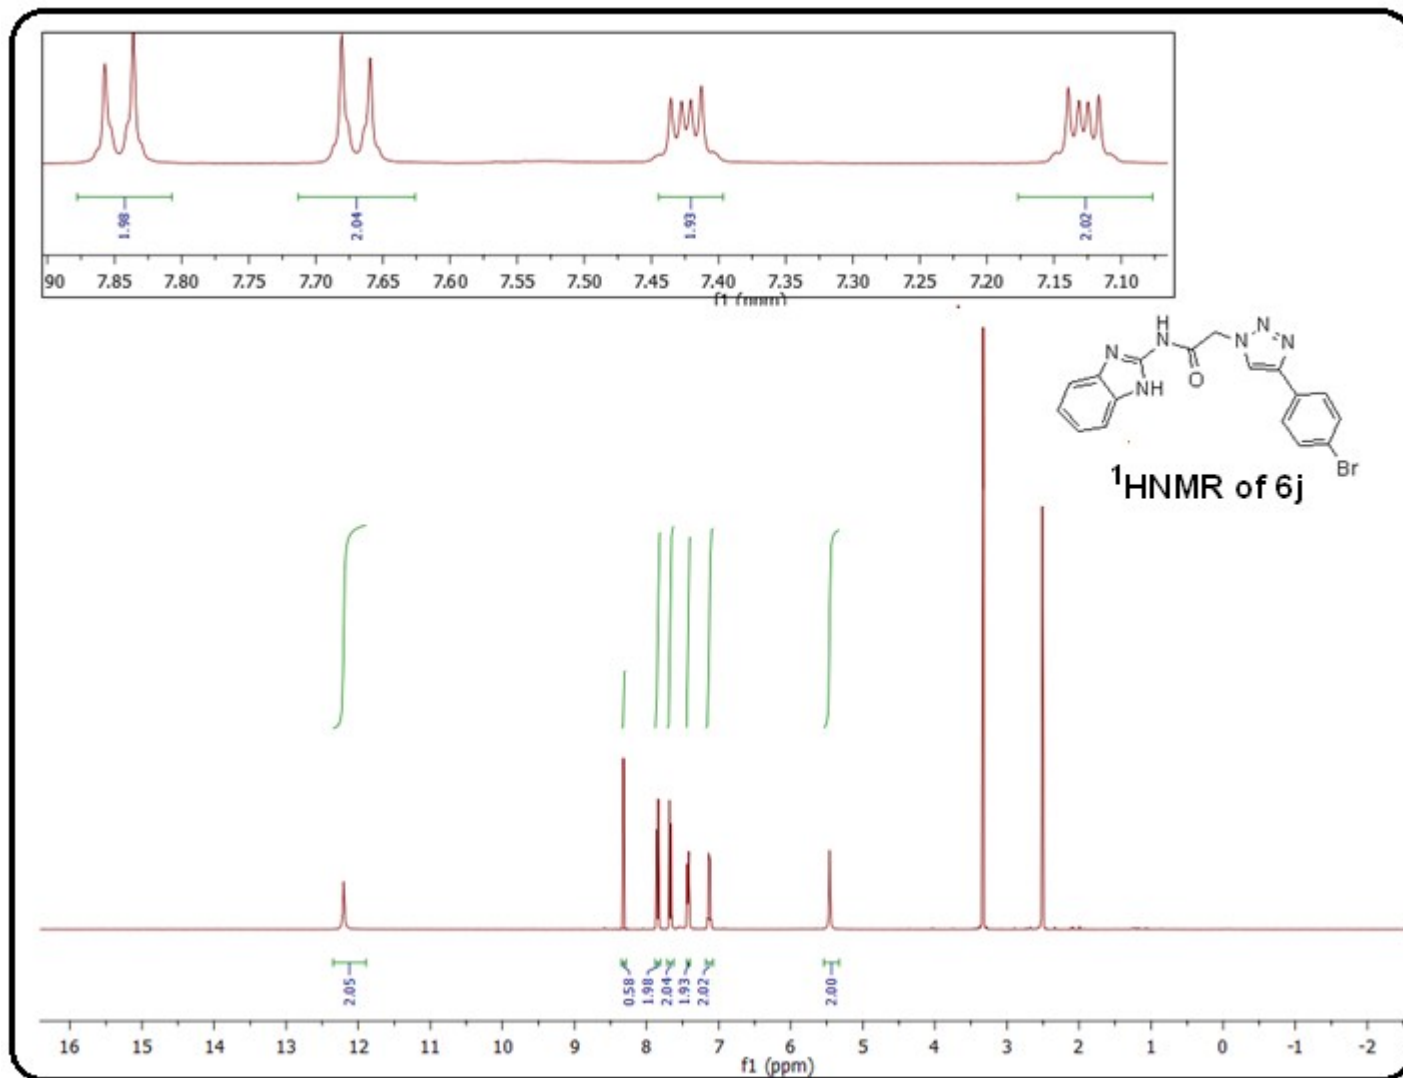

<sup>1</sup>H NMR of 6j

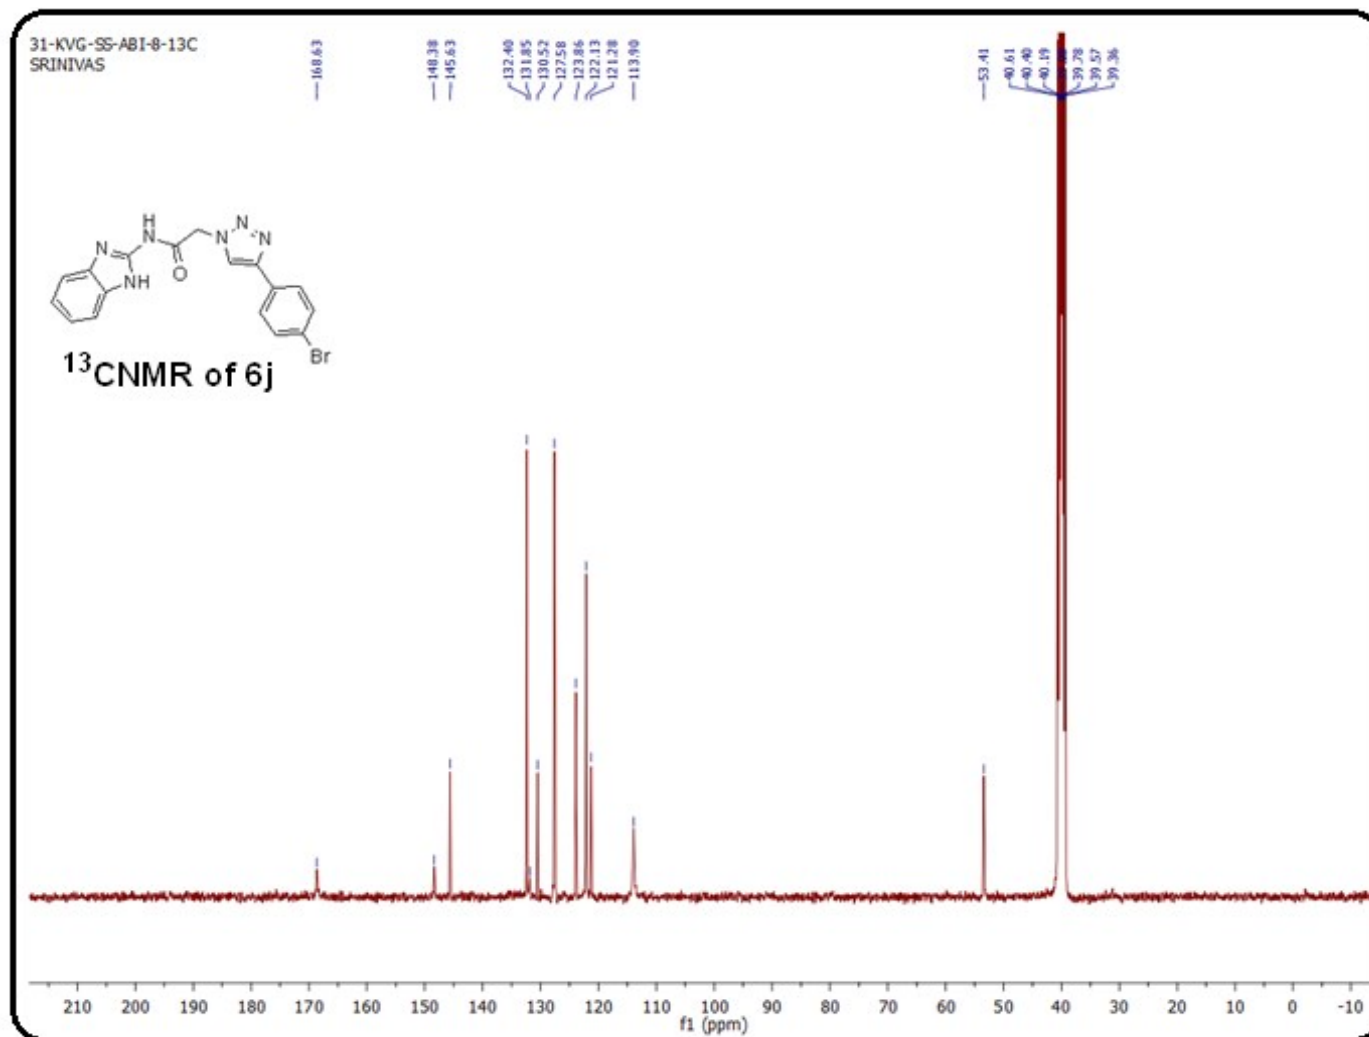

<sup>13</sup>CNMR of 6j

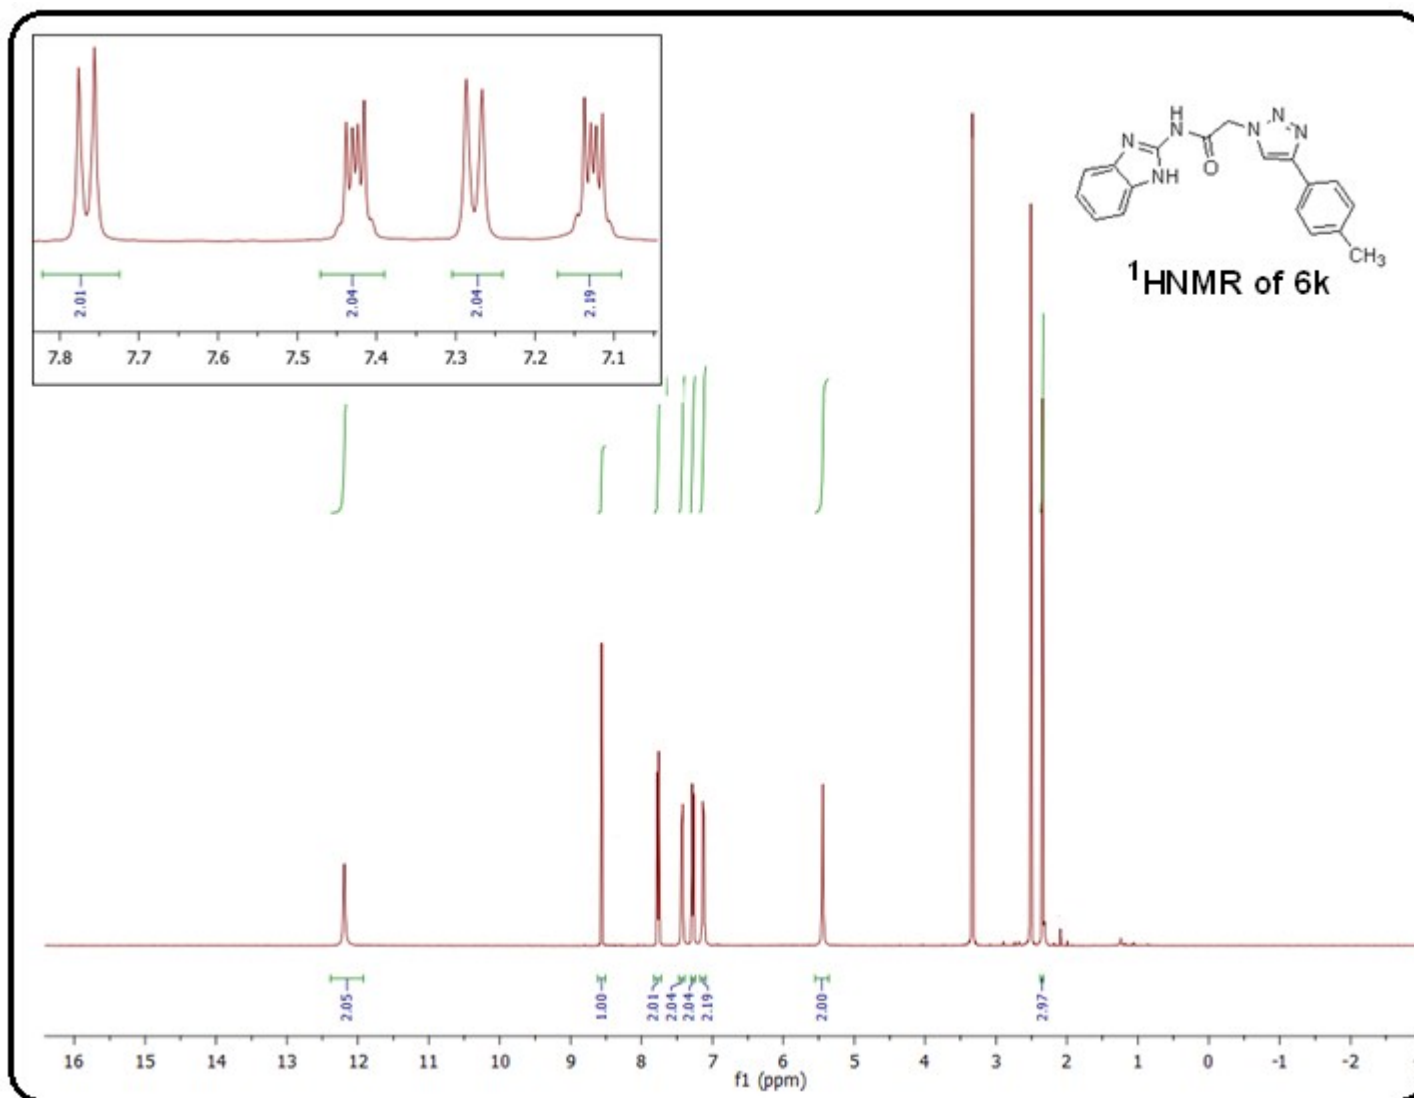

<sup>1</sup>H NMR of 6k

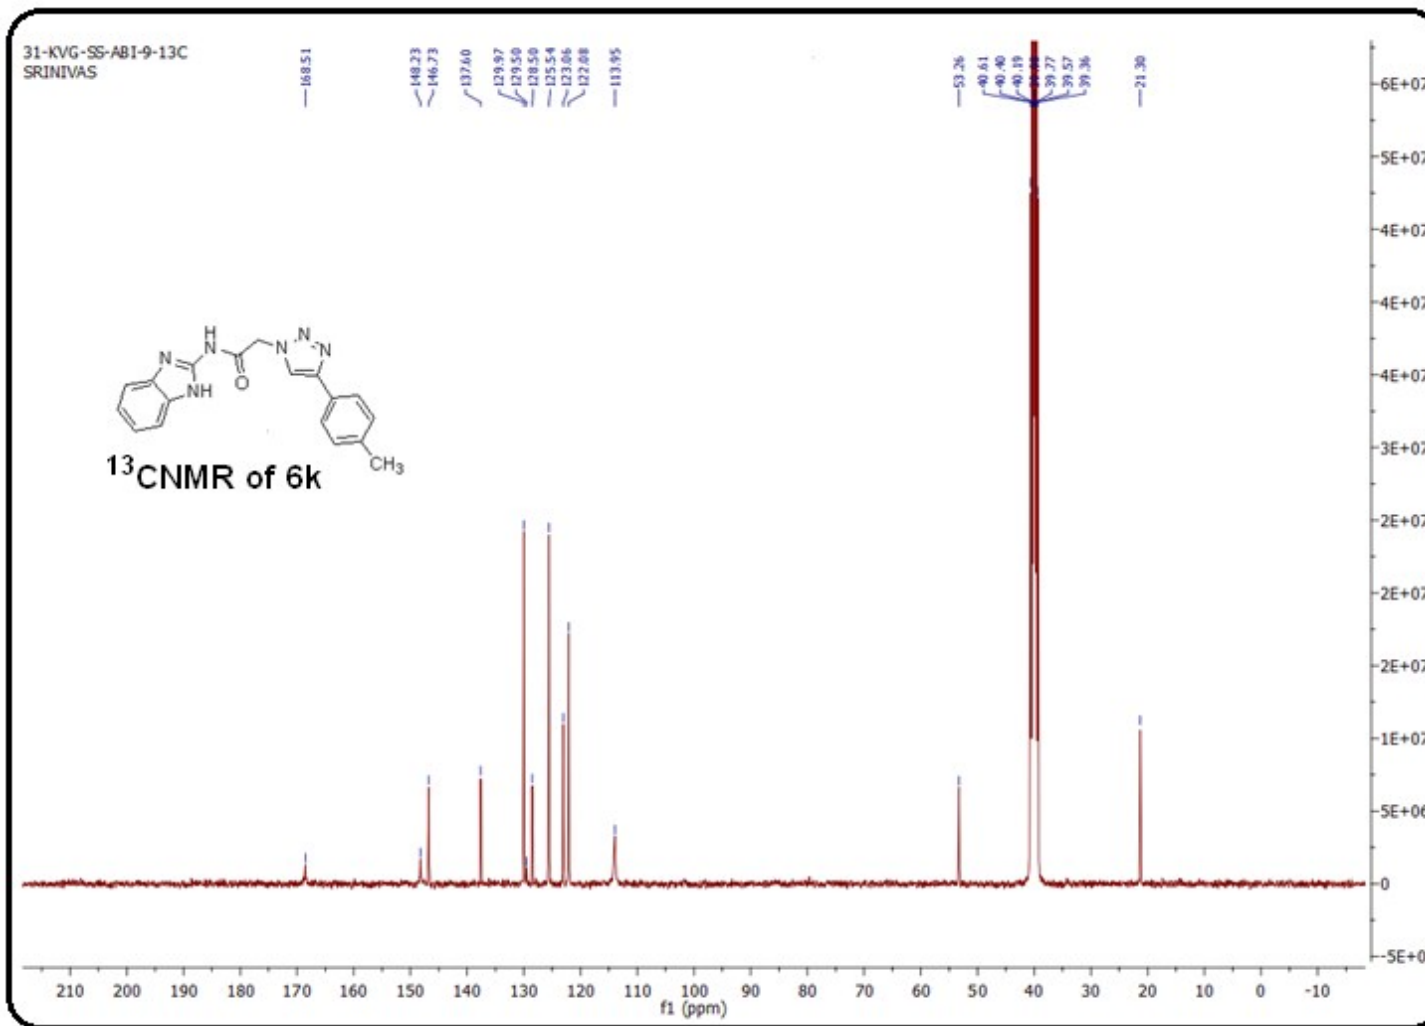

<sup>13</sup>CNMR of 6k

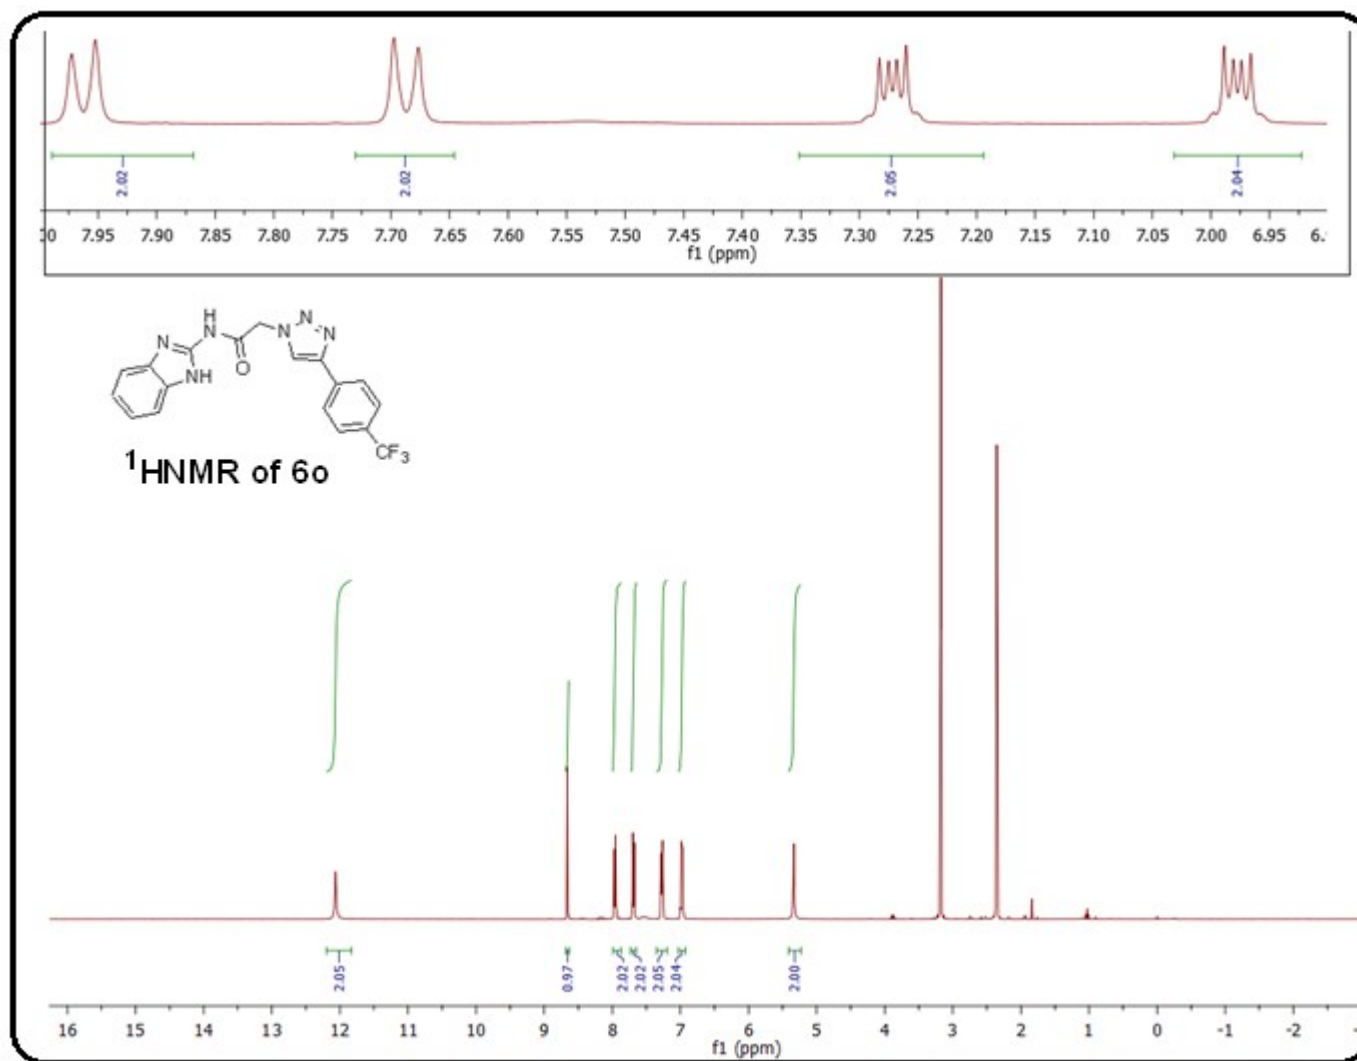

<sup>1</sup>H NMR of 60

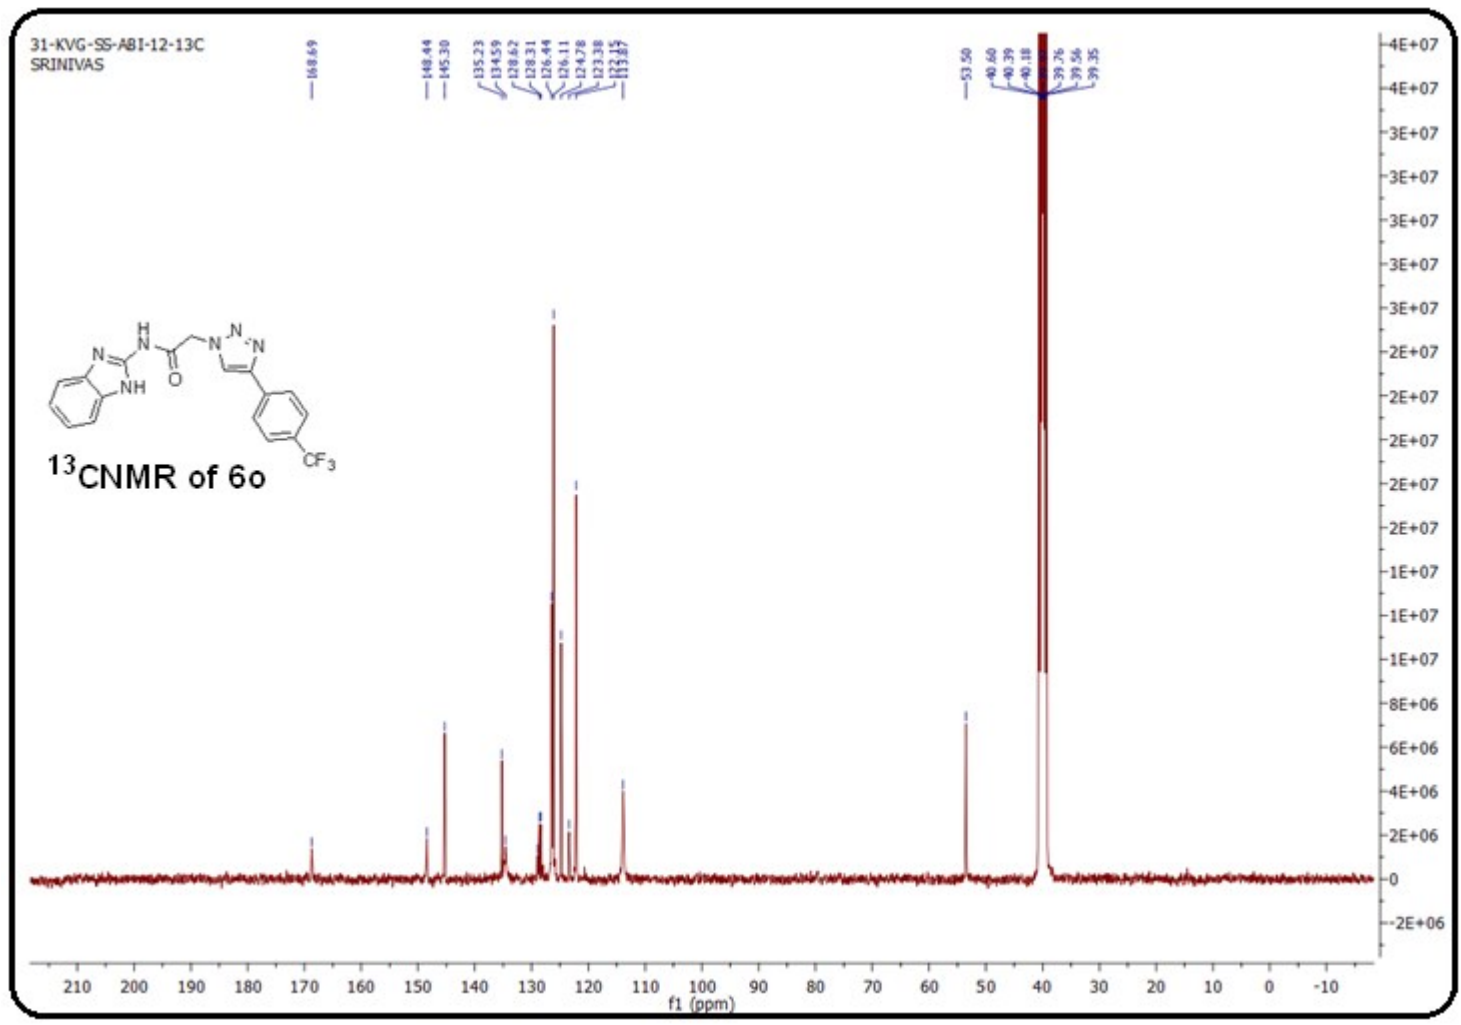

<sup>13</sup>CNMR of 6o

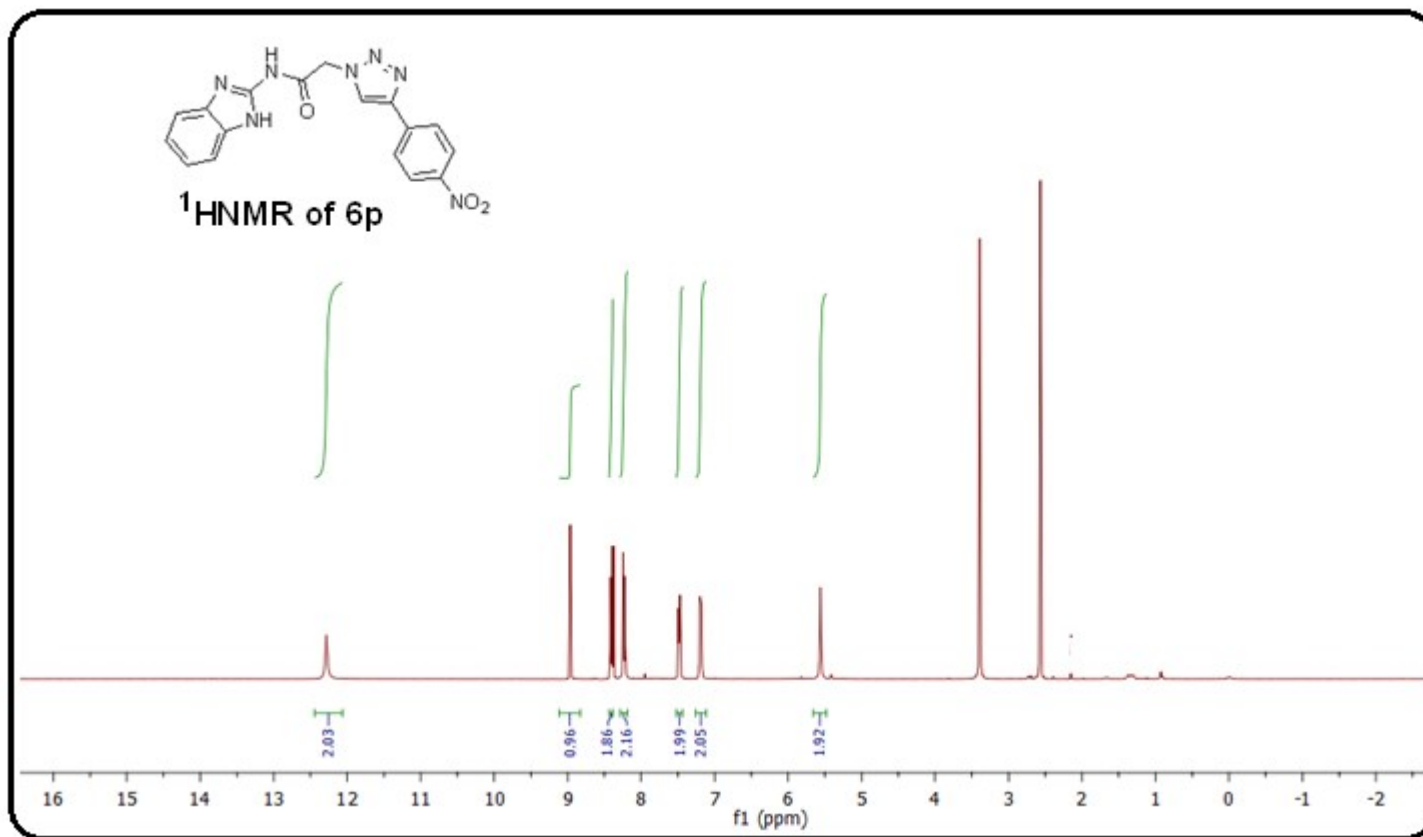

<sup>1</sup>HNMR of 6p

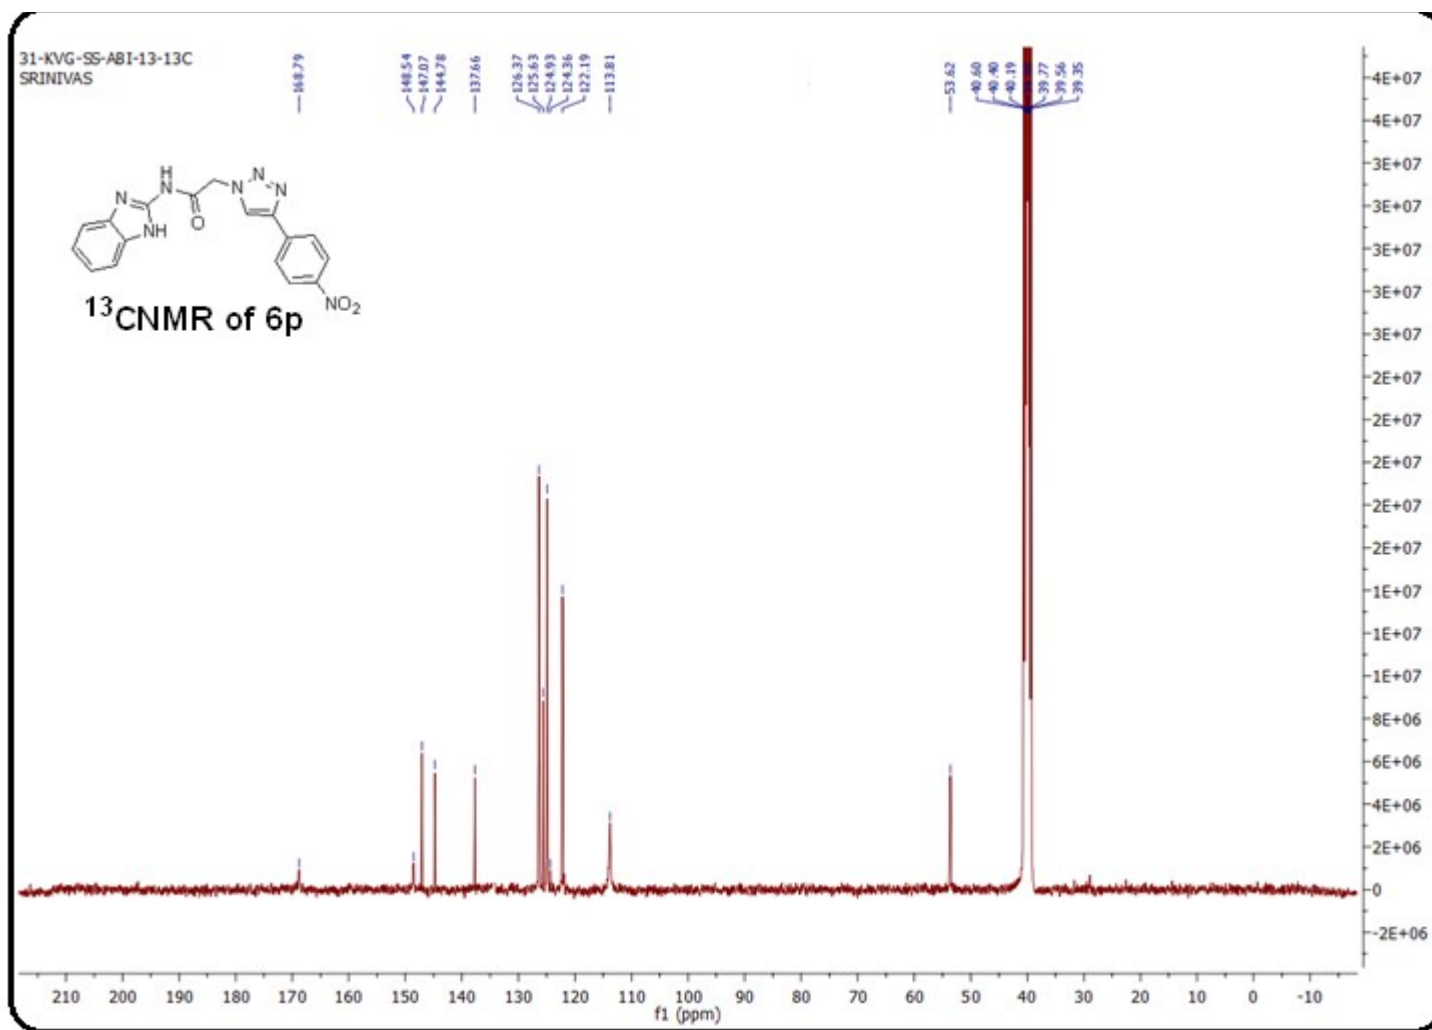

<sup>13</sup>CNMR of 6p



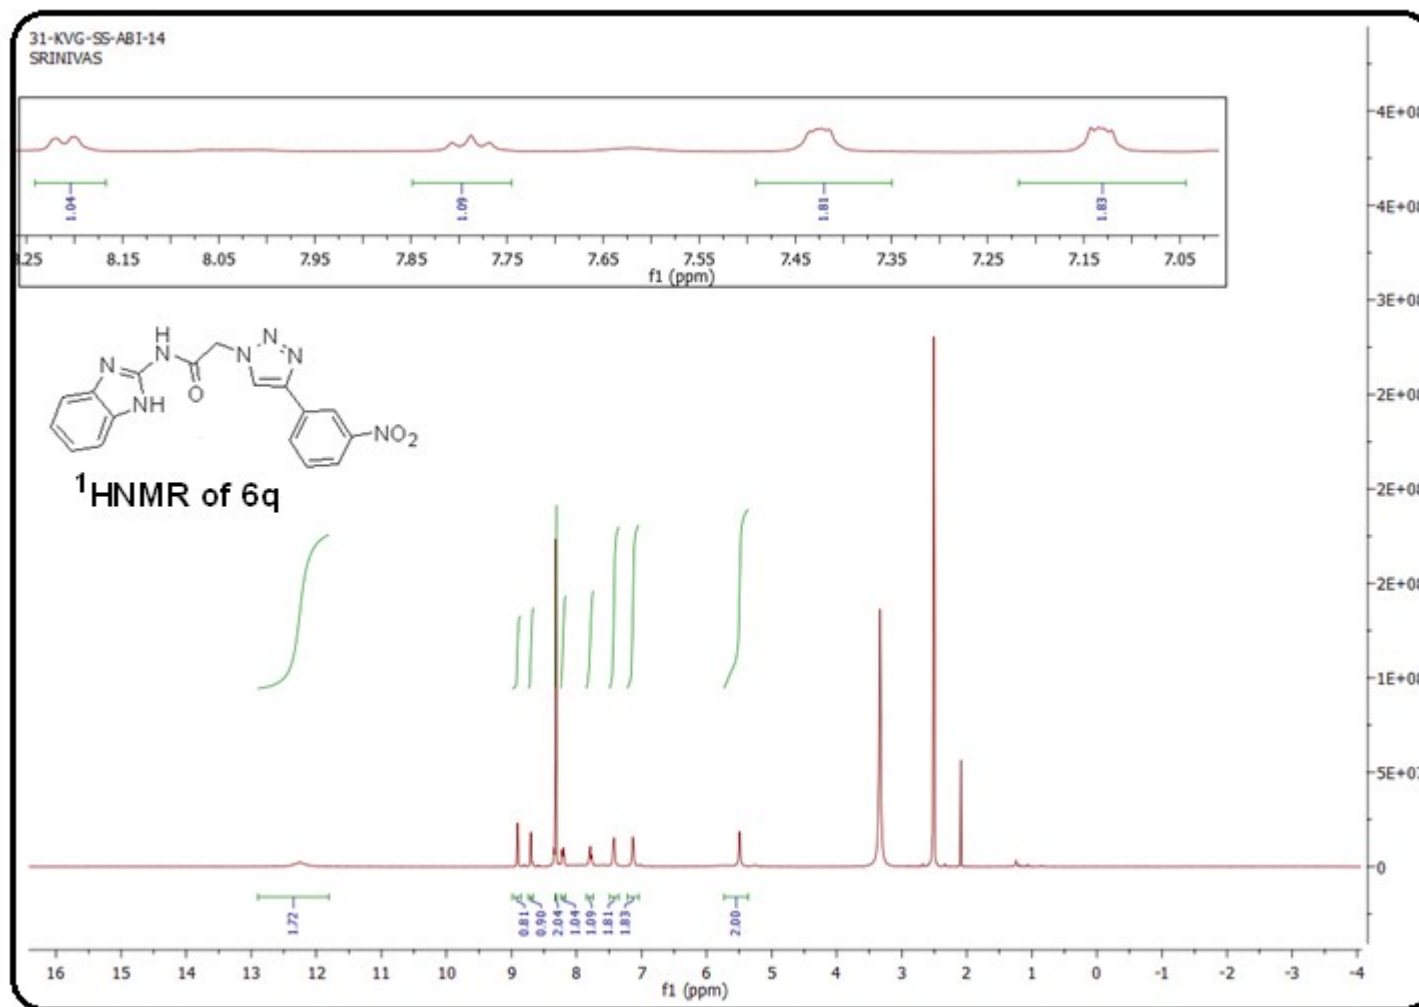

<sup>1</sup>H NMR of 6q

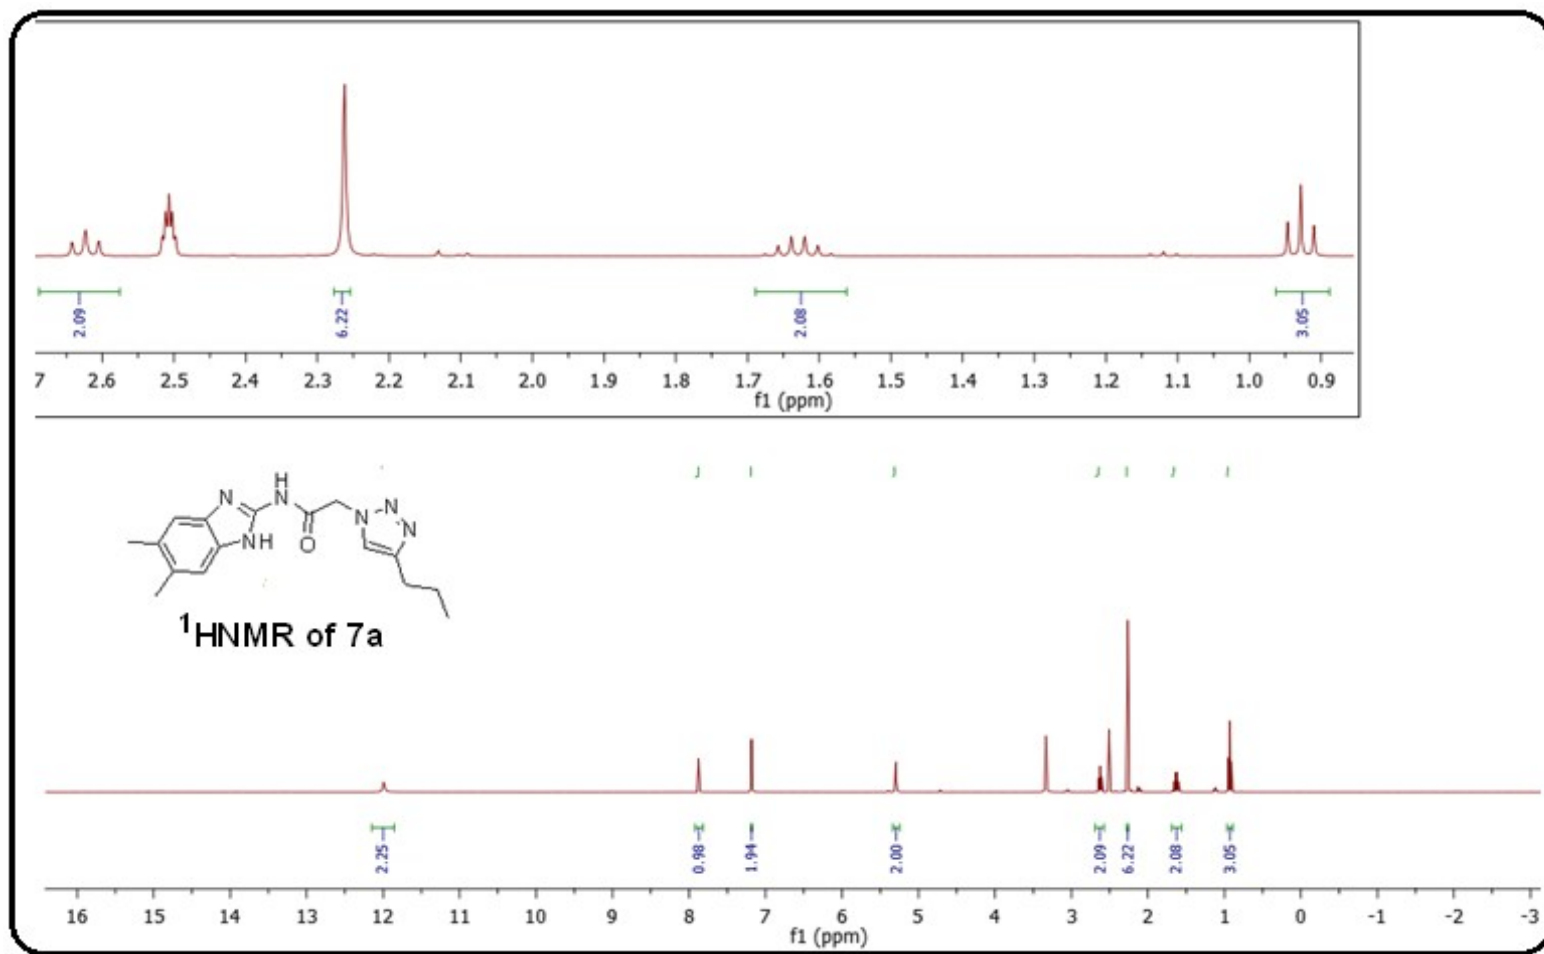

$^1\text{H}$ NMR of **7a**

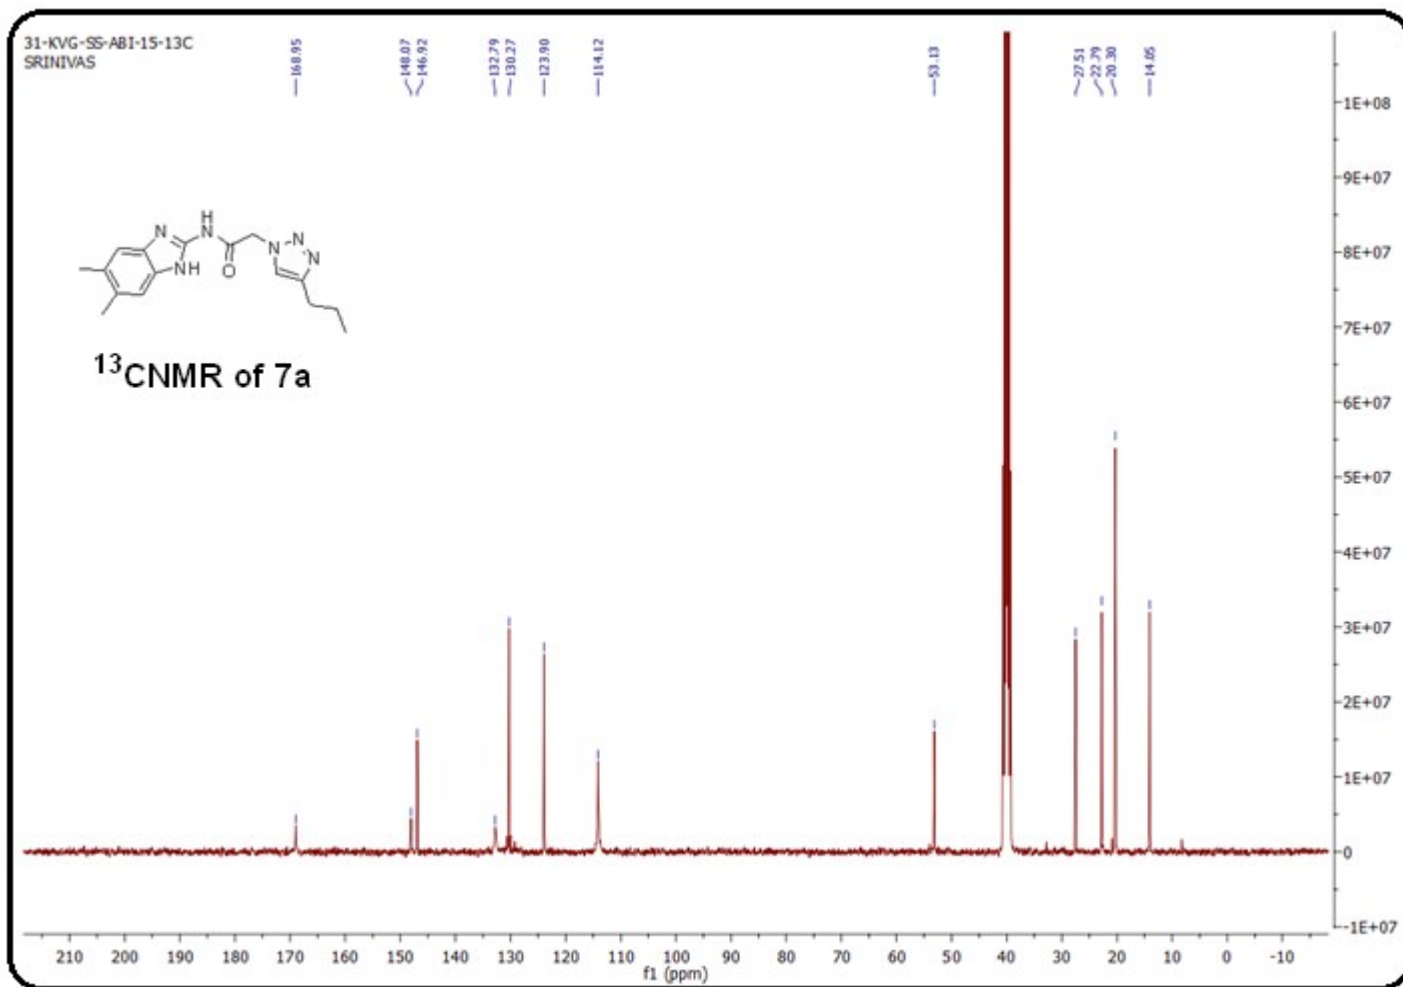

<sup>13</sup>CNMR of 7a

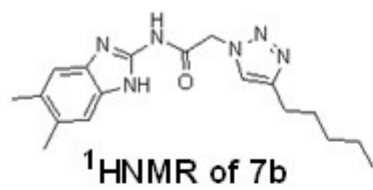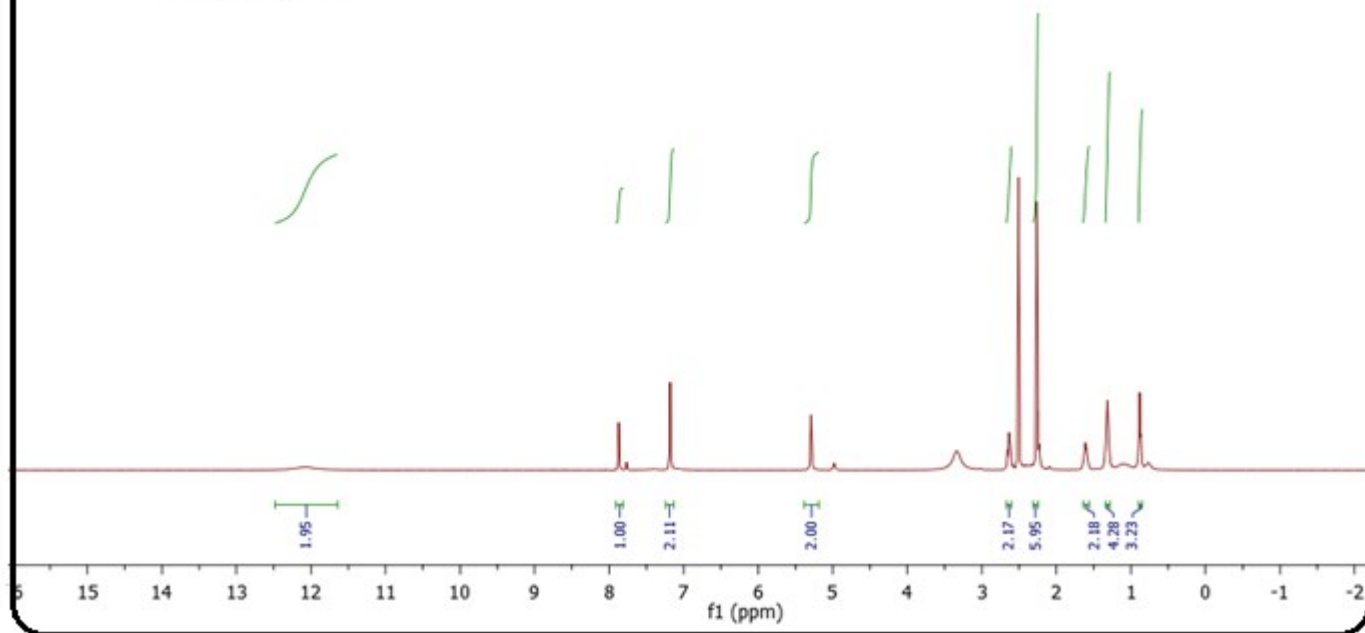

<sup>1</sup>HNMR of 7b

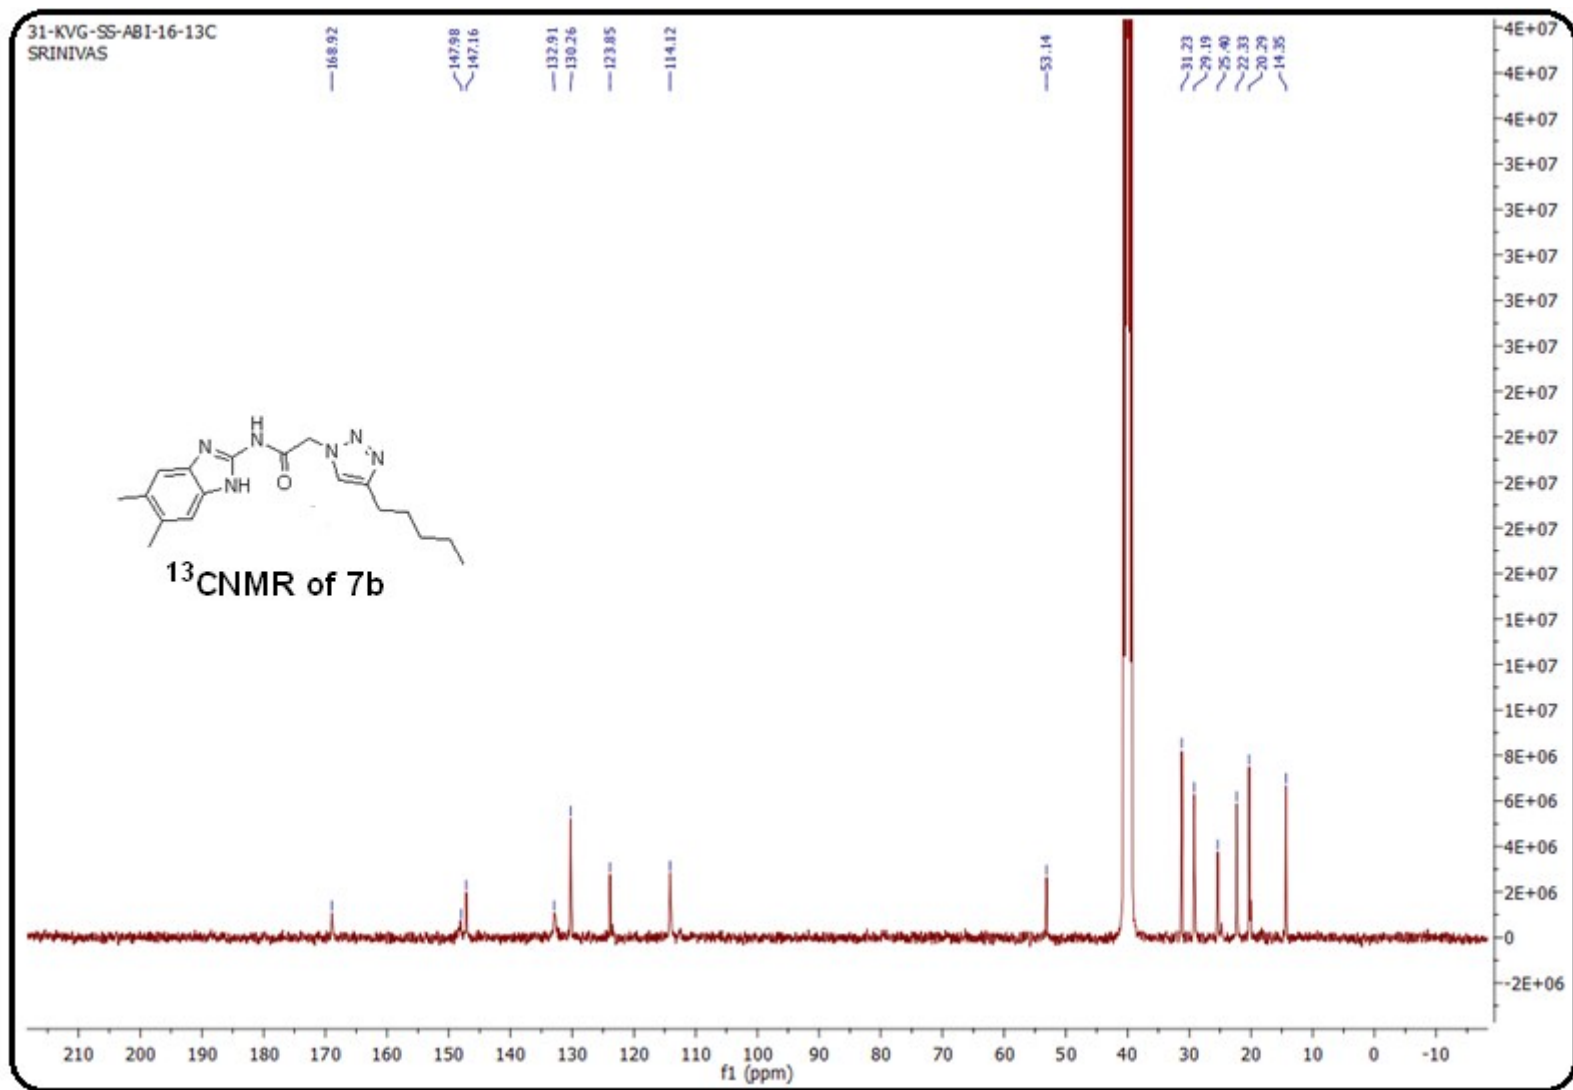

<sup>13</sup>CNMR of 7b

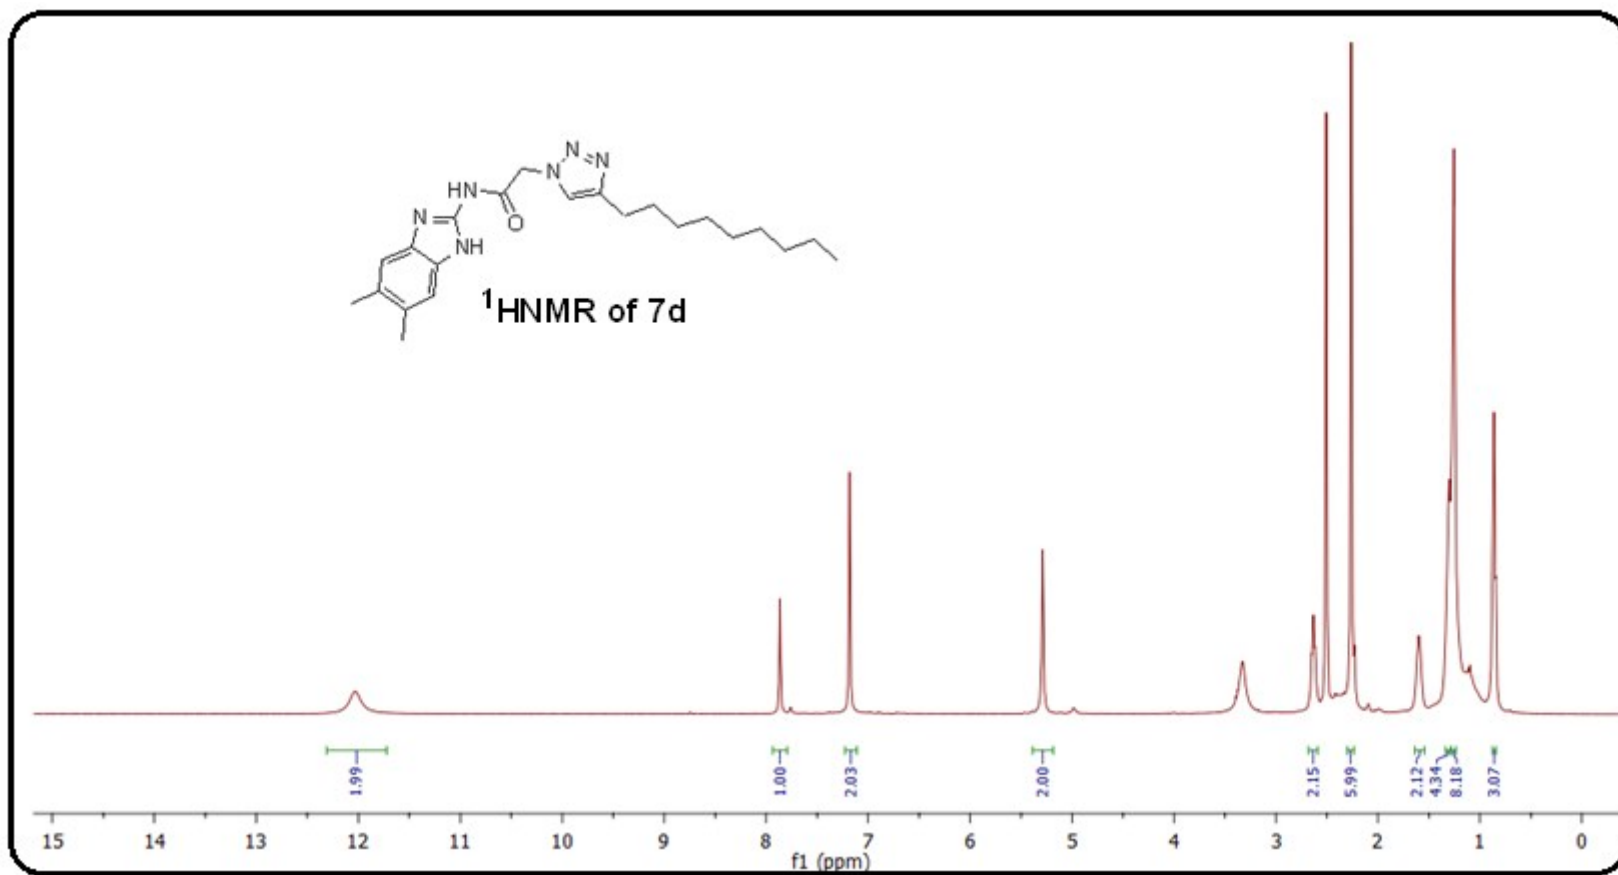

<sup>1</sup>HNMR of 7d

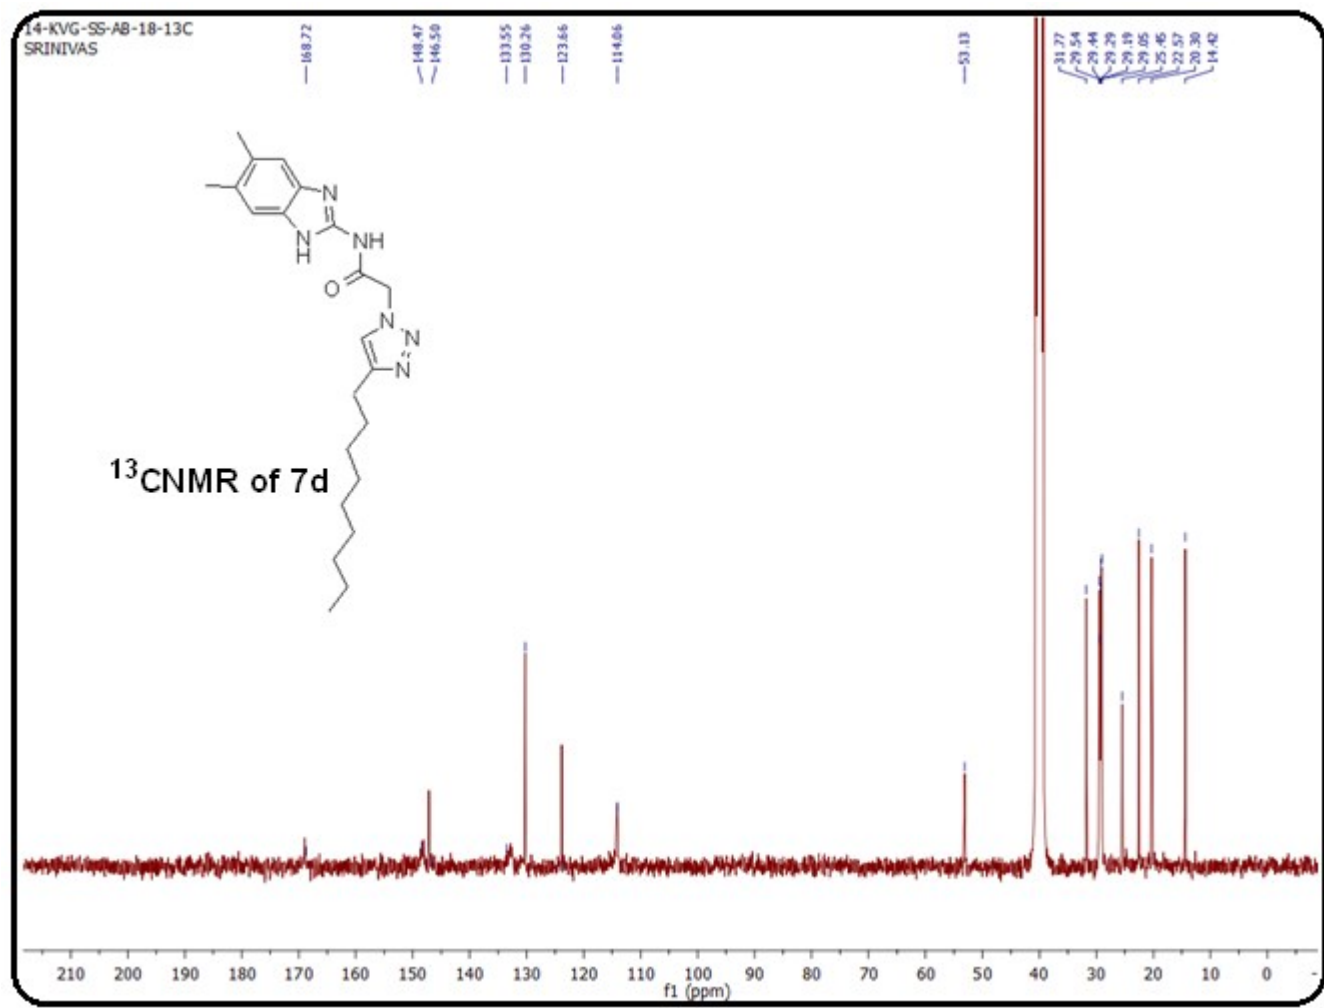

<sup>13</sup>CNMR of 7d

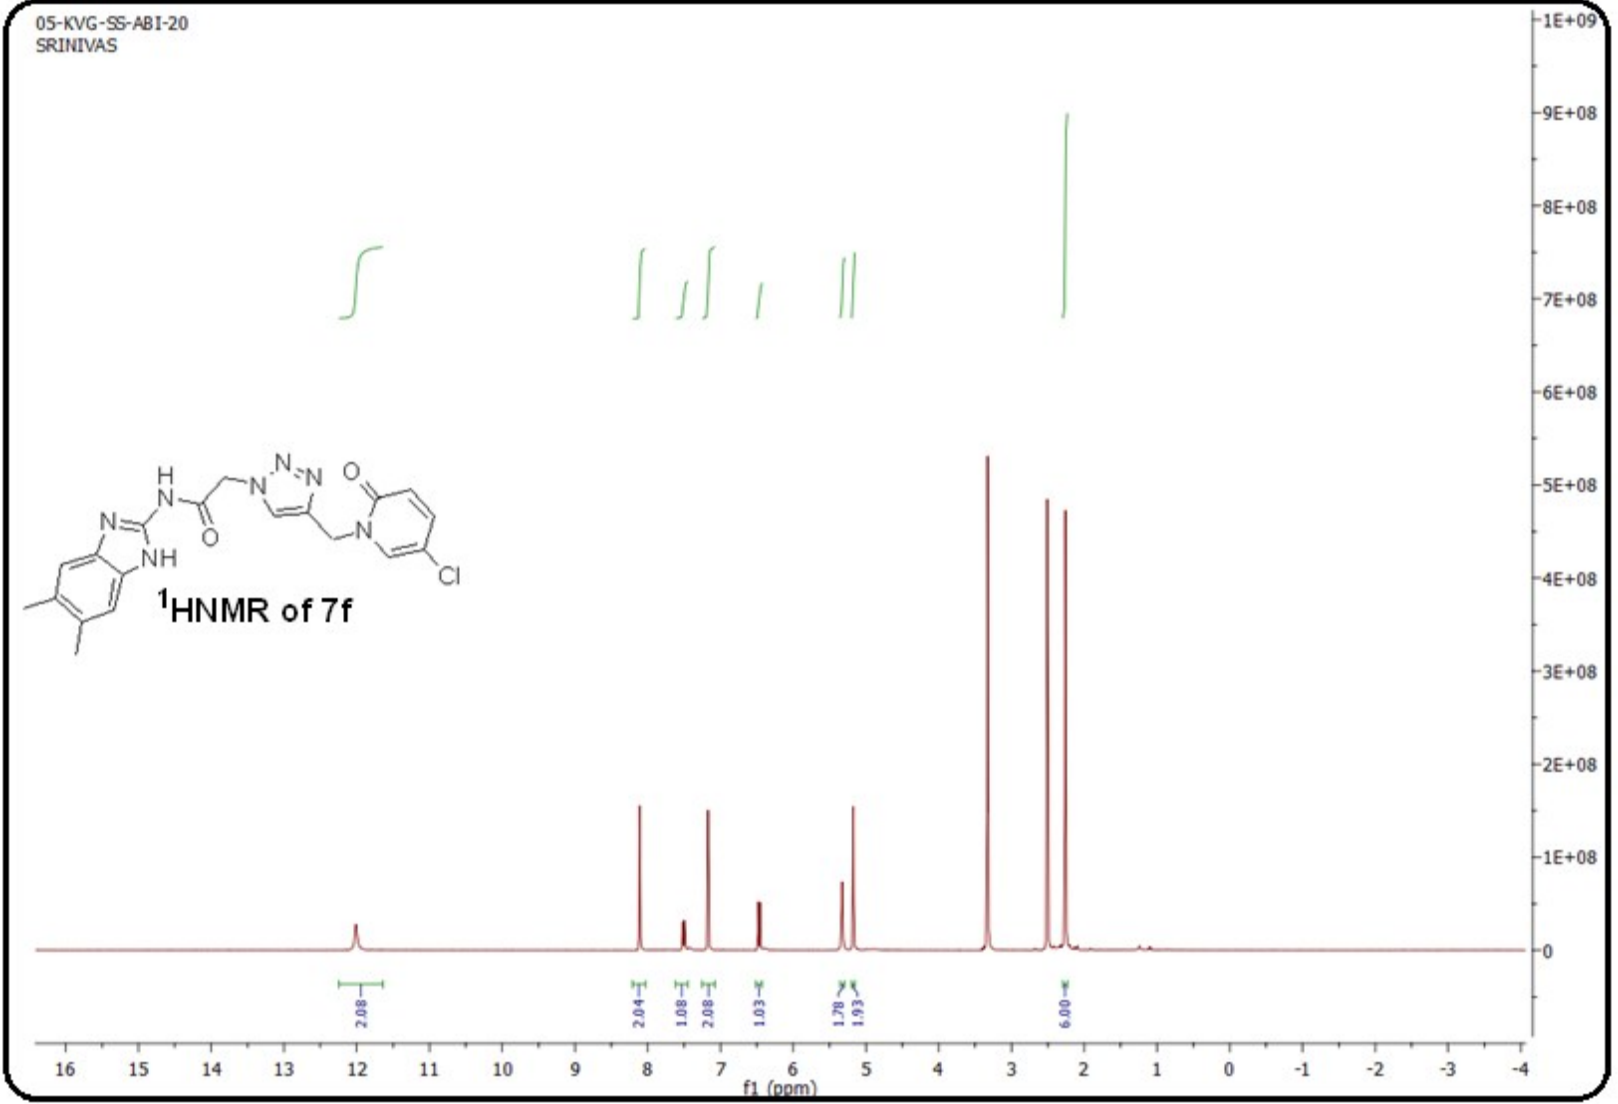

<sup>1</sup>HNMR of 7f



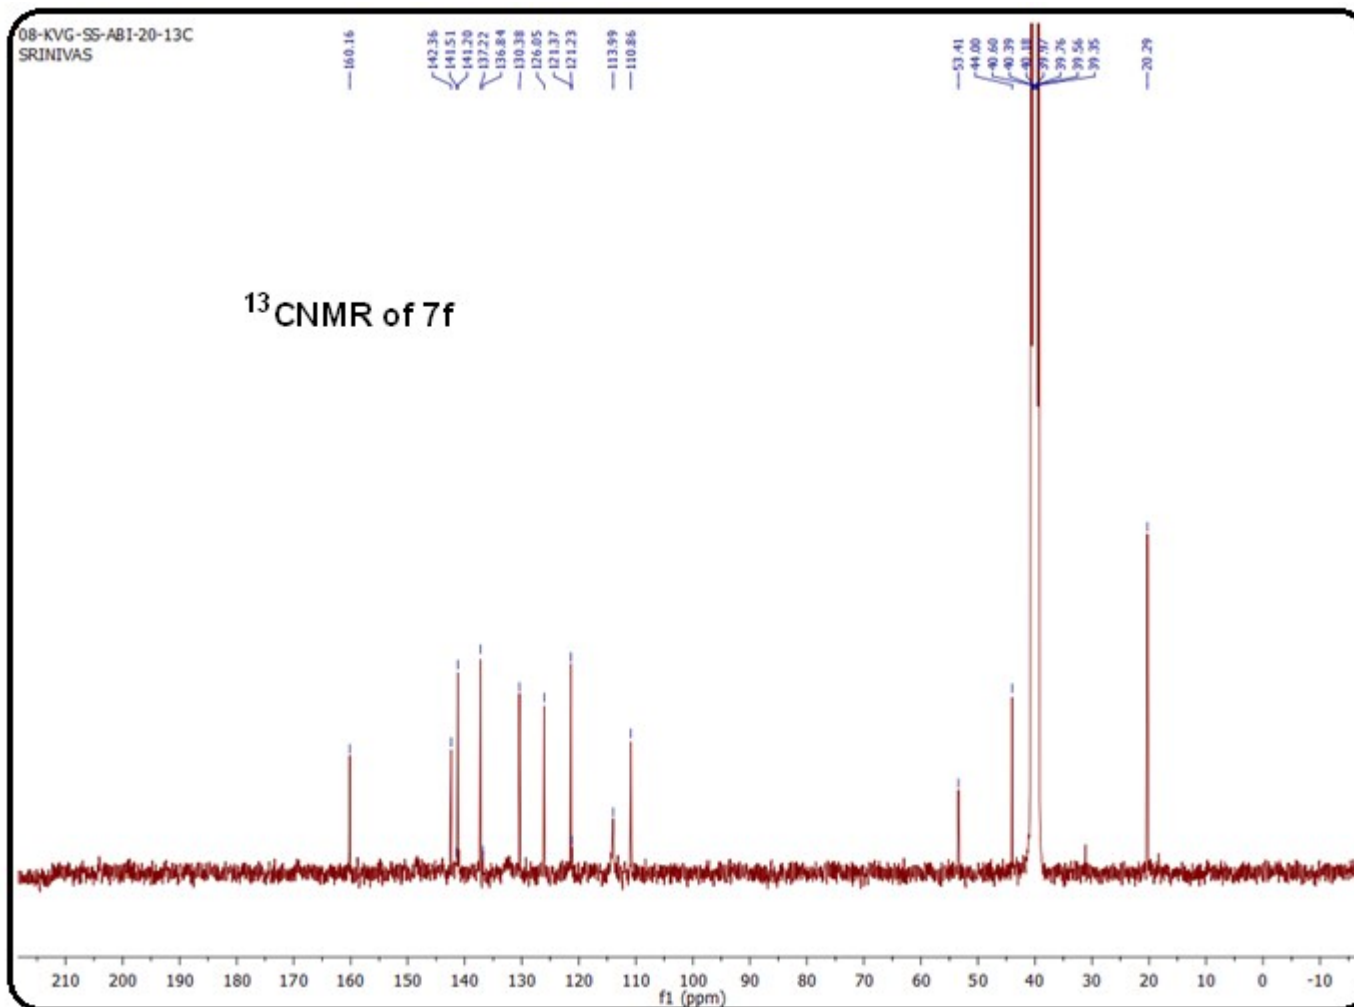

$^{13}\text{C}$ NMR of 7f

05-KVG-SS-AB1-23  
SRINIVAS

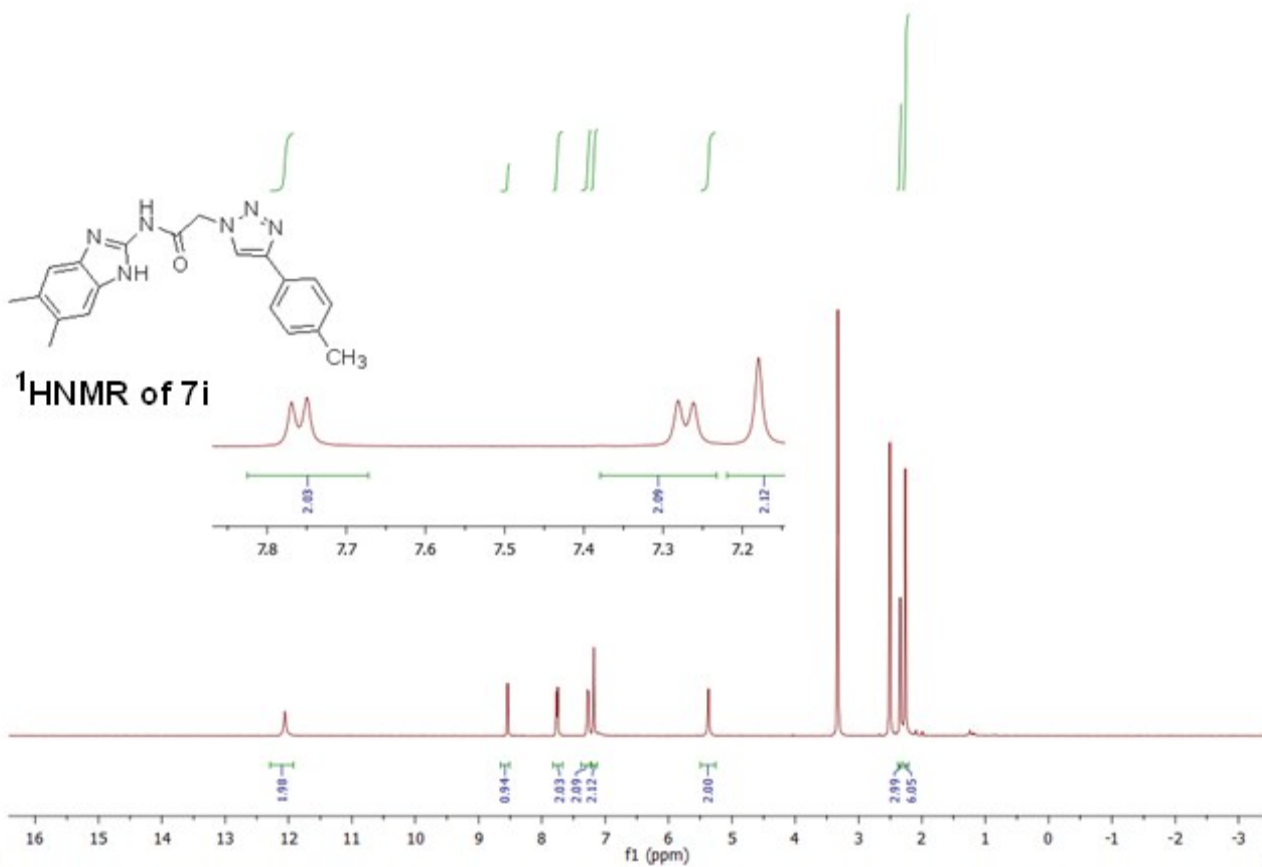

<sup>1</sup>H NMR of 7i

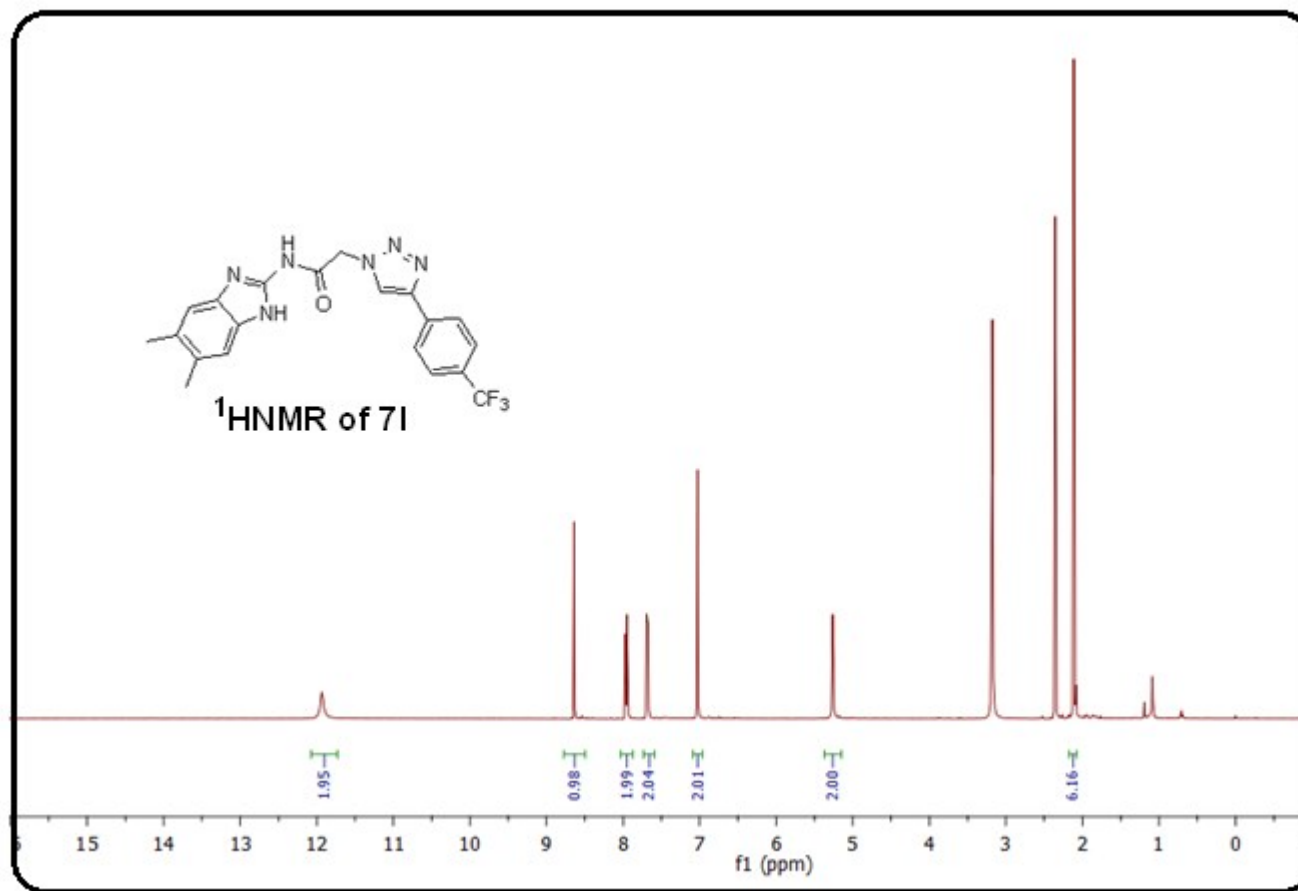

<sup>1</sup>H NMR of 71

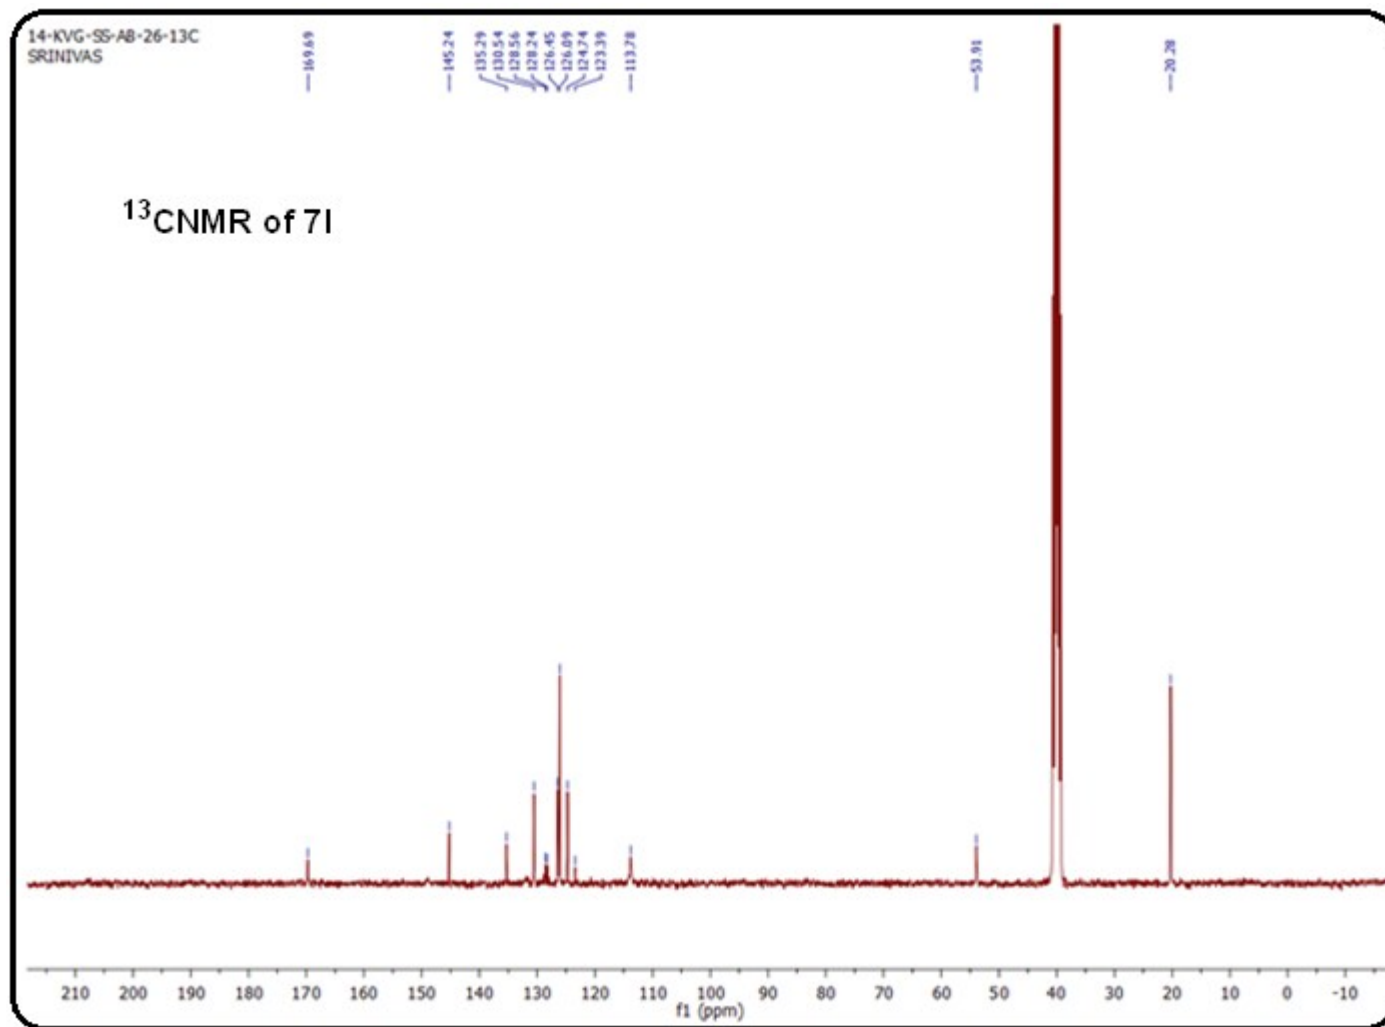

$^{13}\text{C}$ NMR of 71

05-KVG-SS-AB1-27  
SRINIVAS

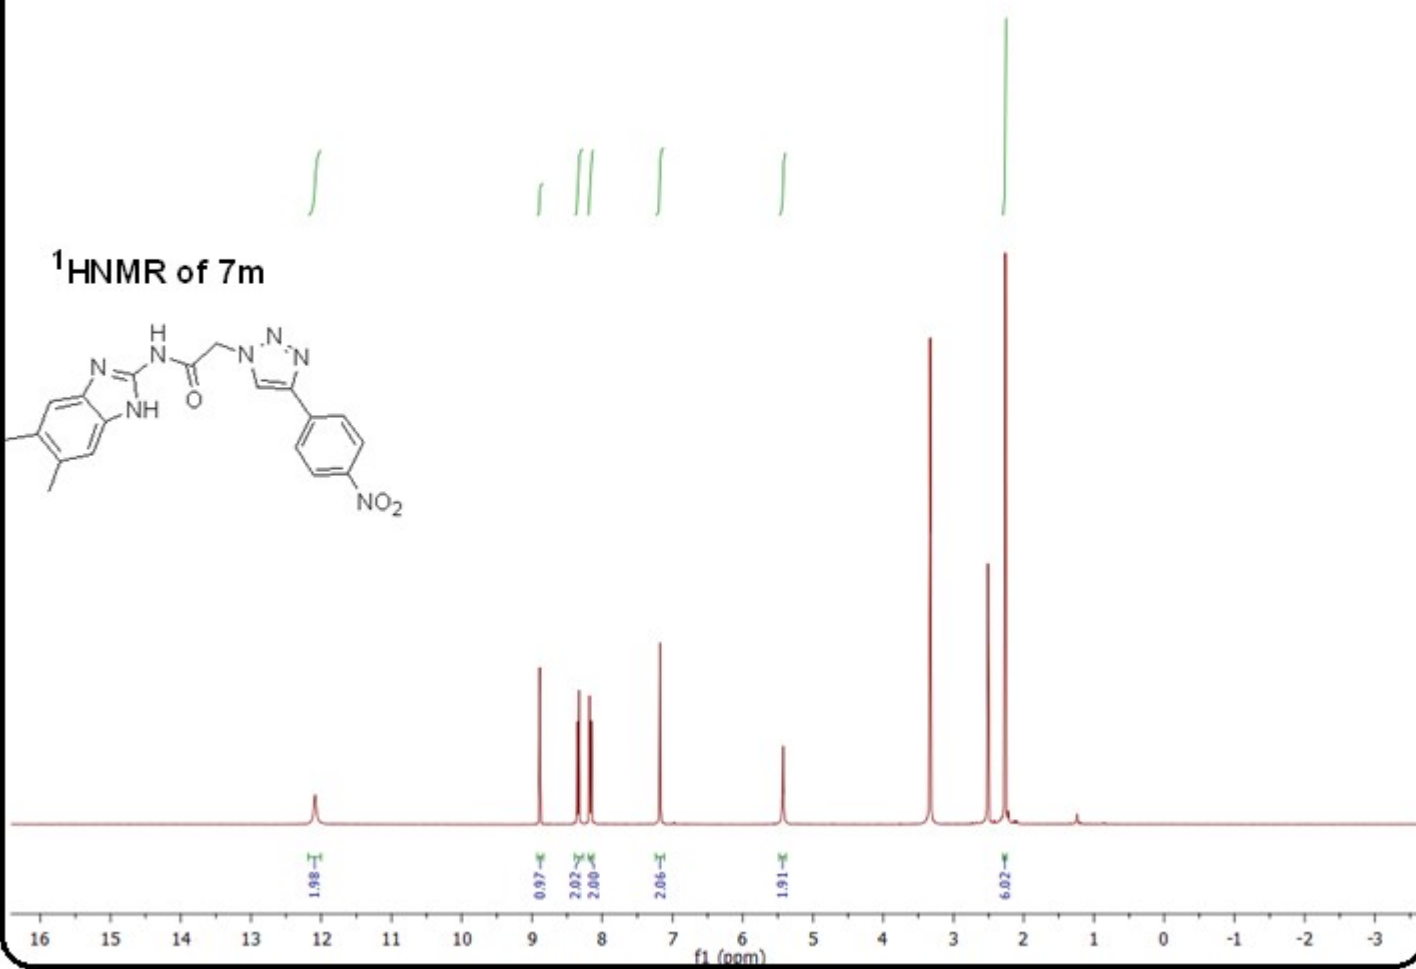

<sup>1</sup>HNMR of 7m

05-KVG-SS-AB1-28  
SRINIVAS

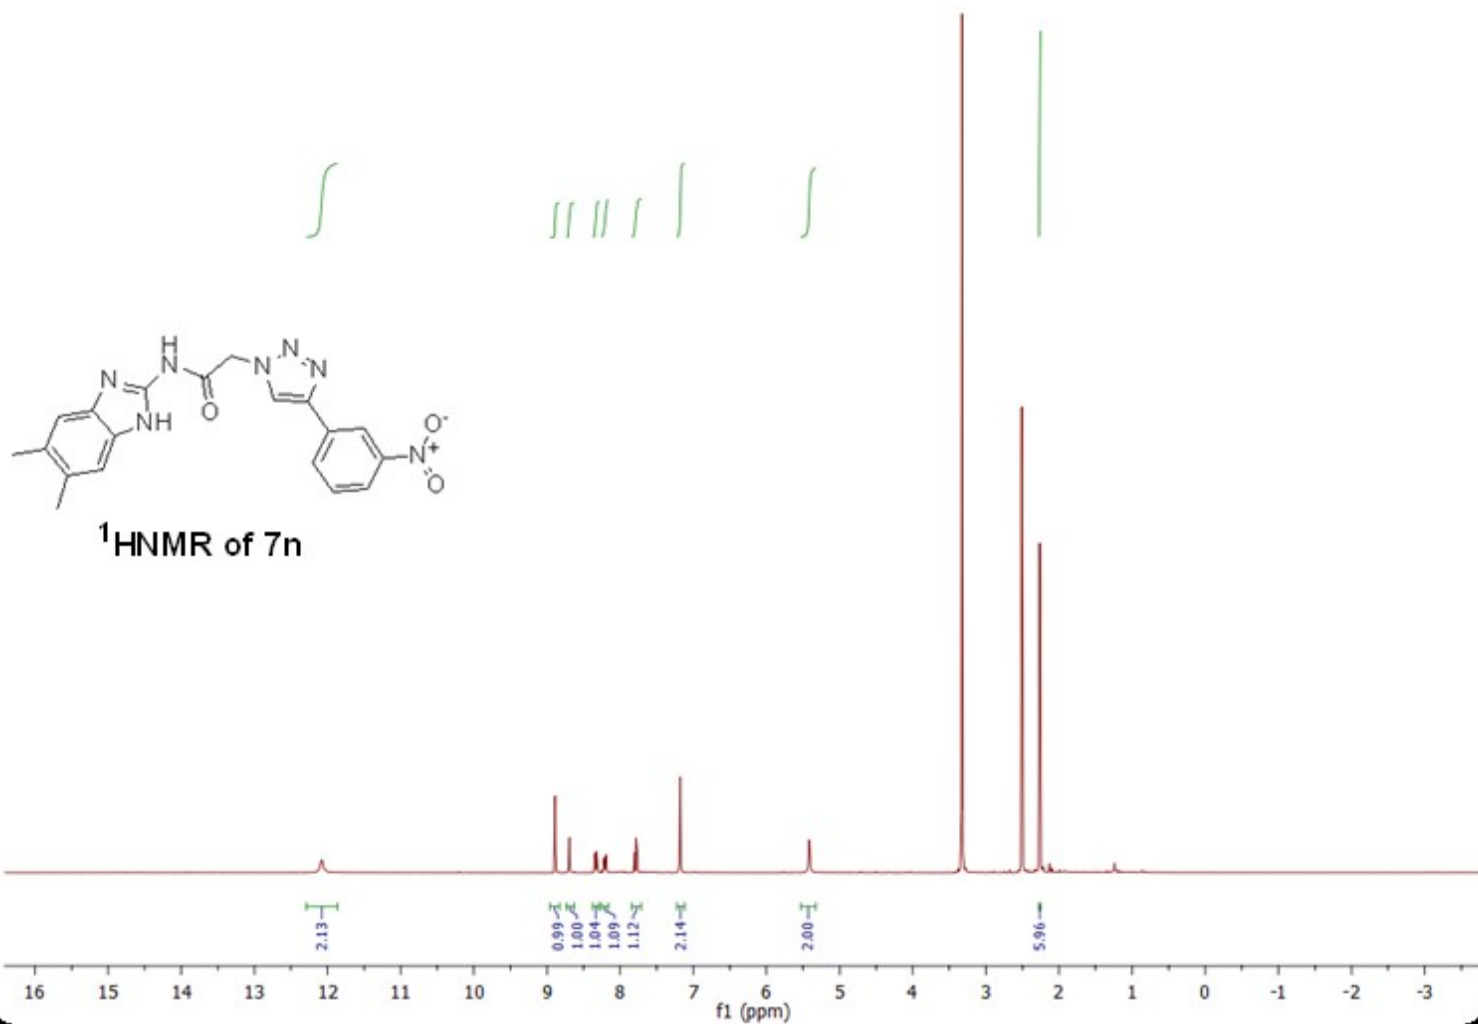

<sup>1</sup>H NMR of 7n

05-KVG-SS-AB1-36  
SRINIVAS

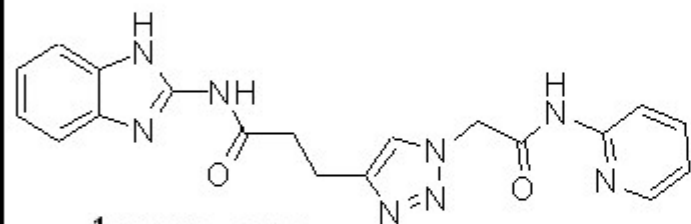

<sup>1</sup>HNMR of 10b

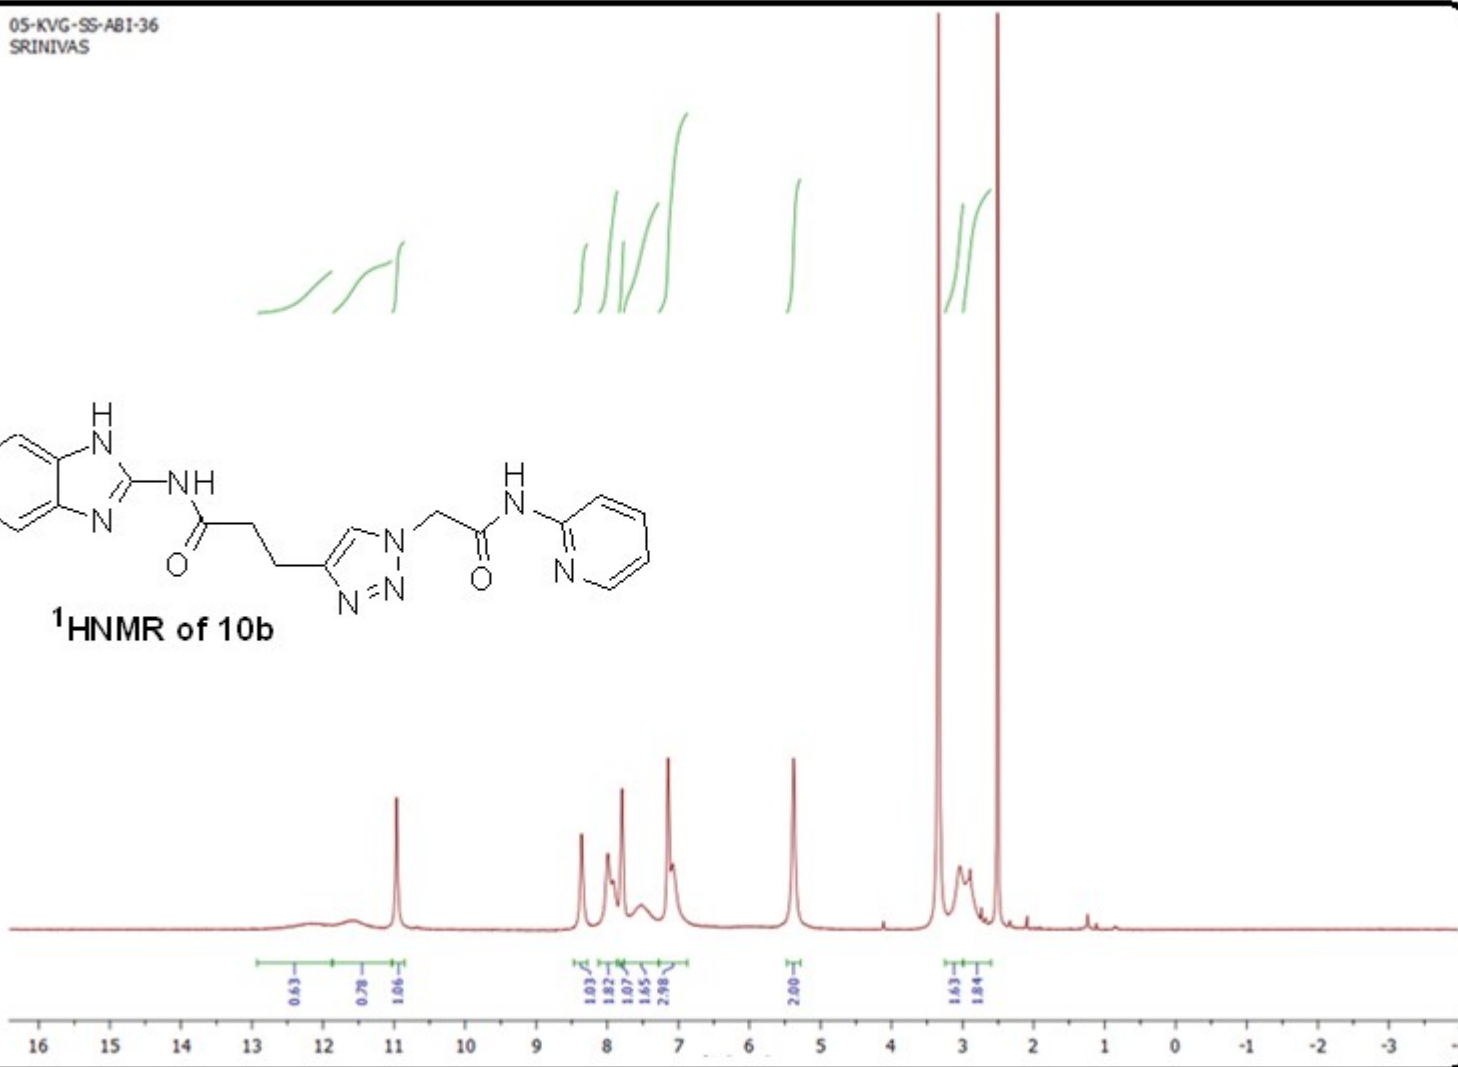

<sup>1</sup>HNMR of 10b

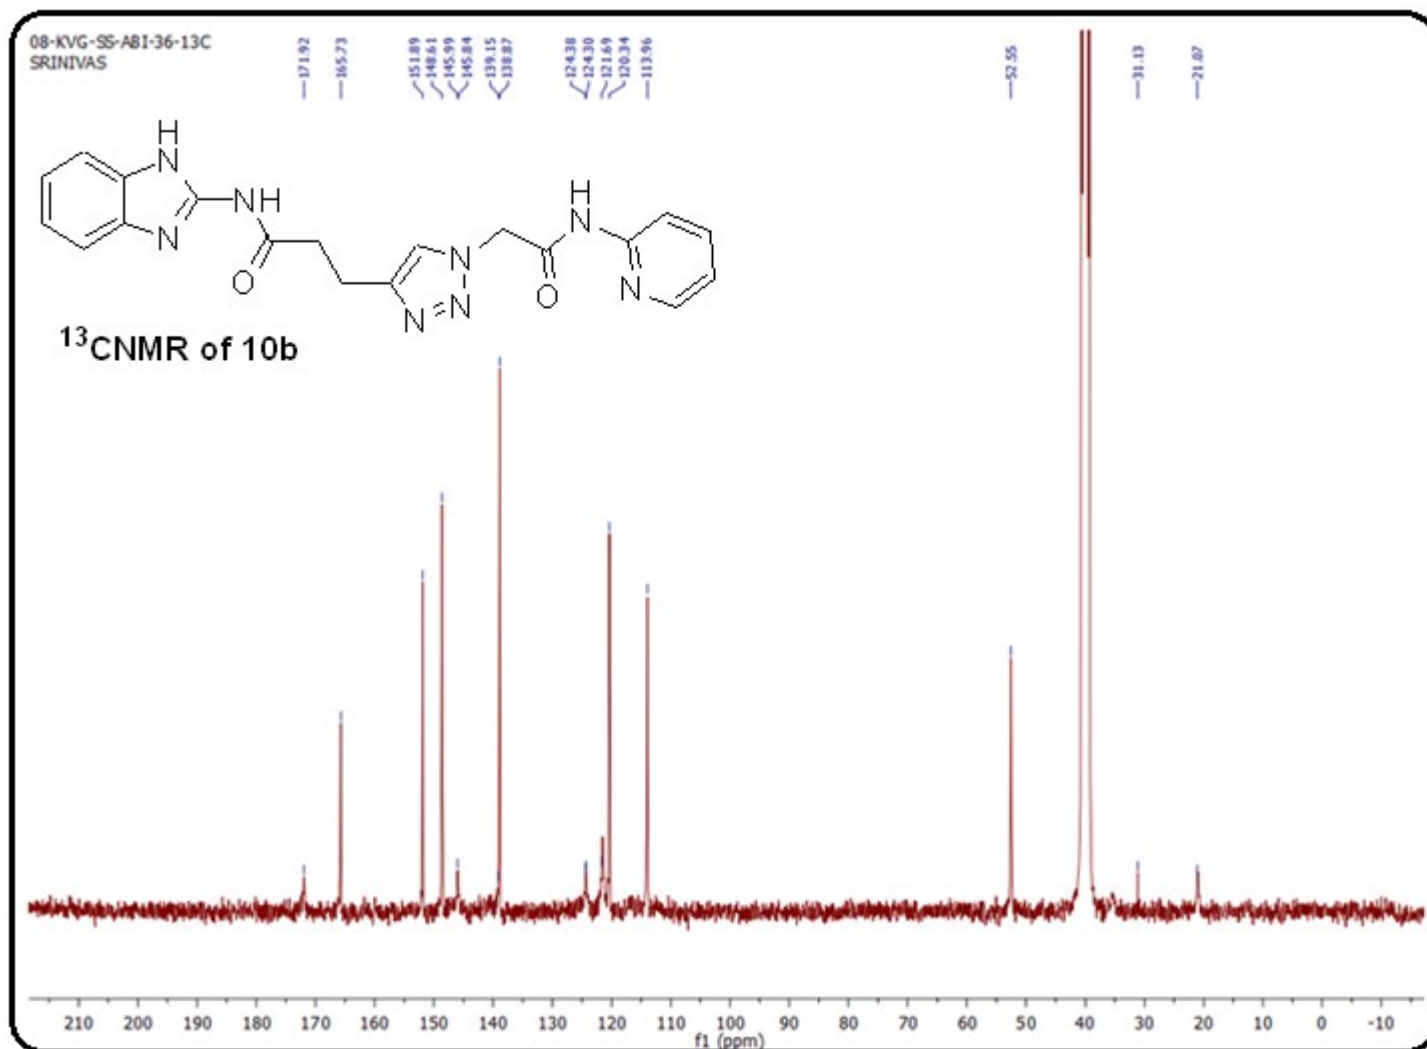

<sup>13</sup>CNMR of 10b



<sup>1</sup>H NMR of 11a

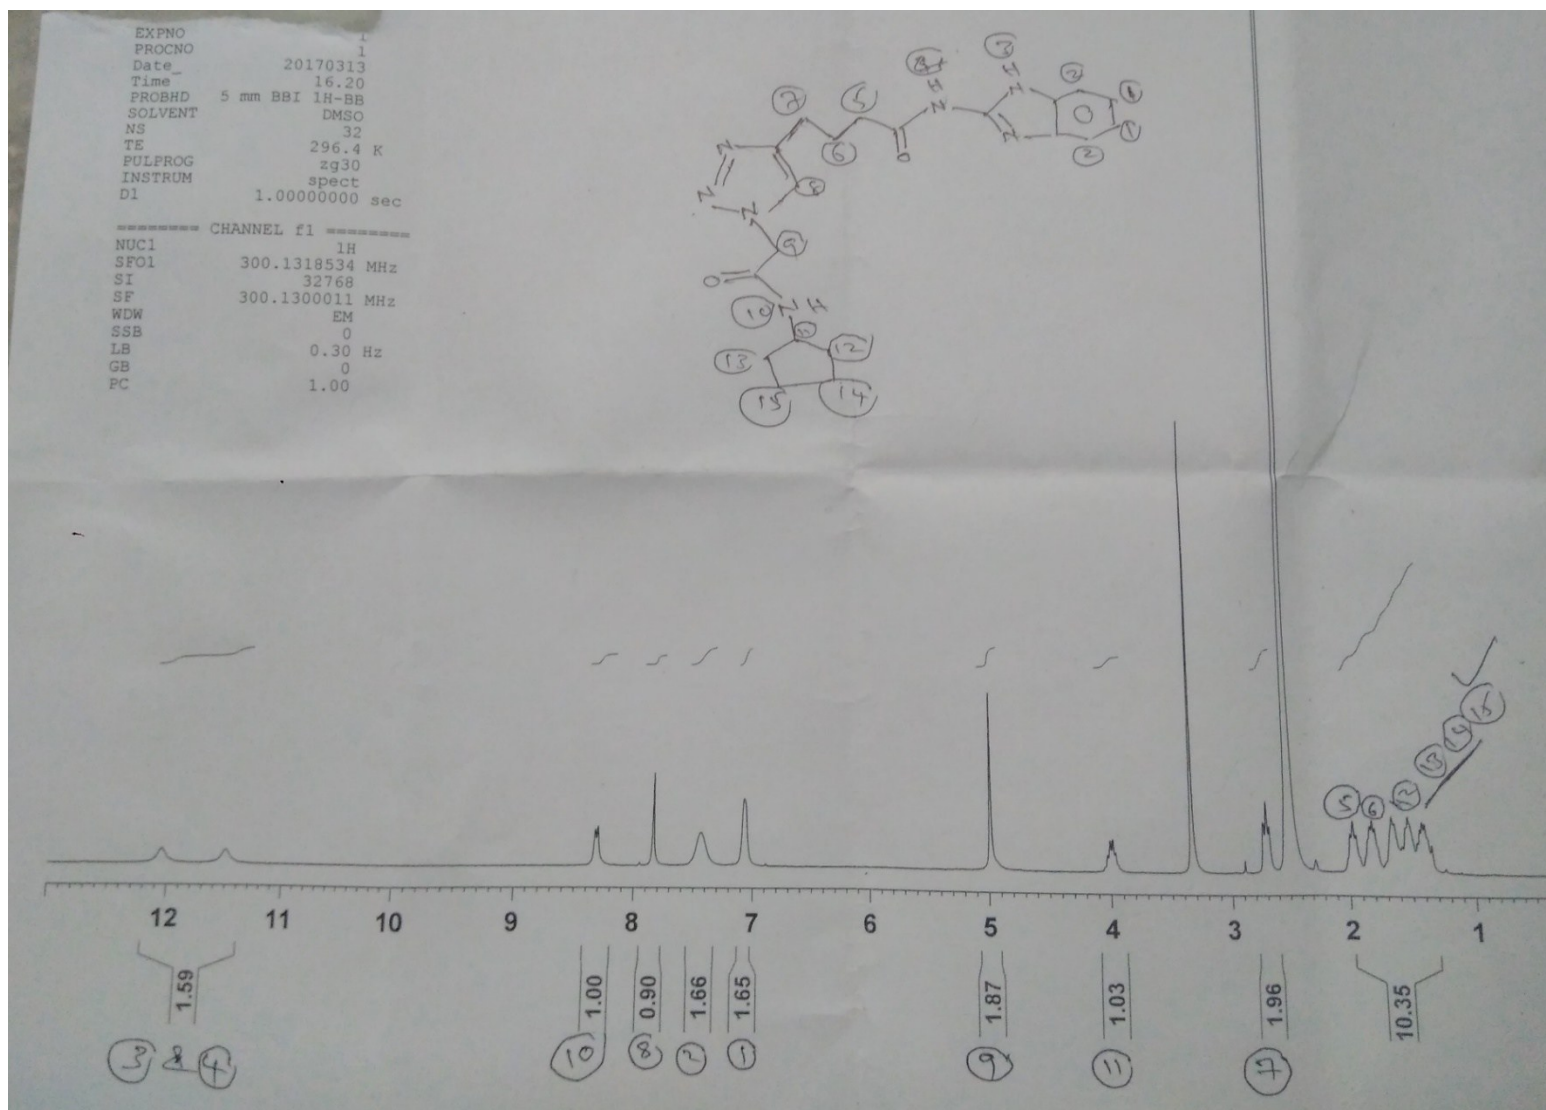

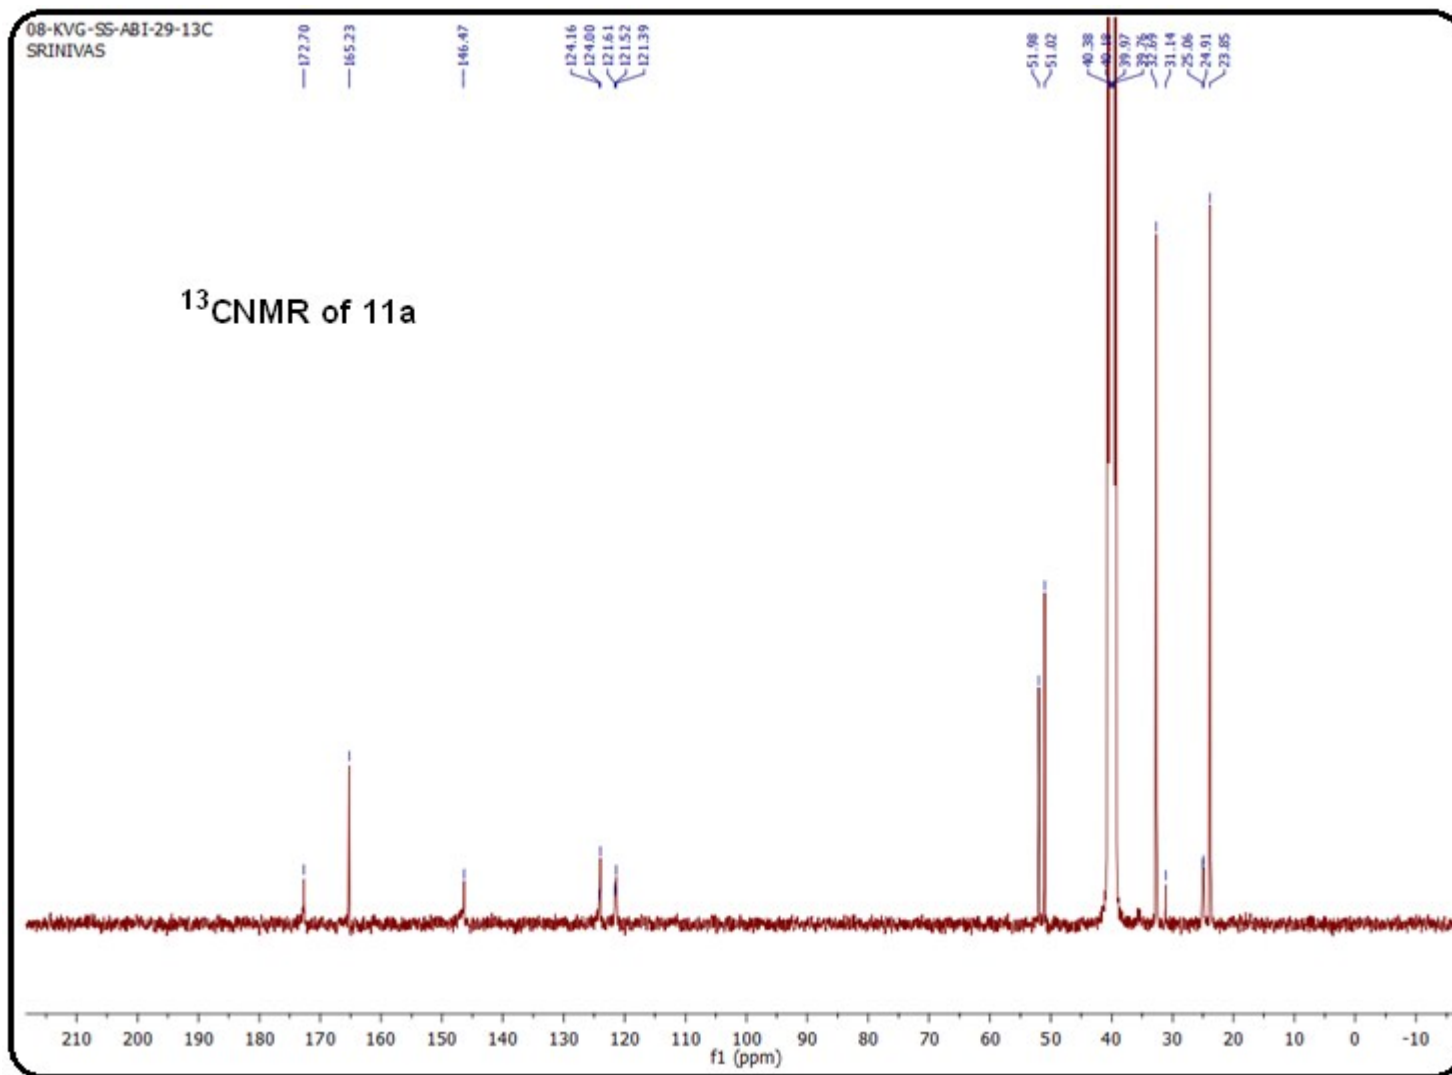

$^{13}\text{C}$ NMR of 11a

05-KVG-SS-AB1-31  
SRINIVAS

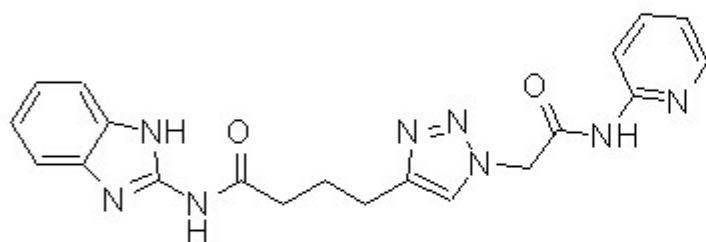

<sup>1</sup>HNMR of 11c

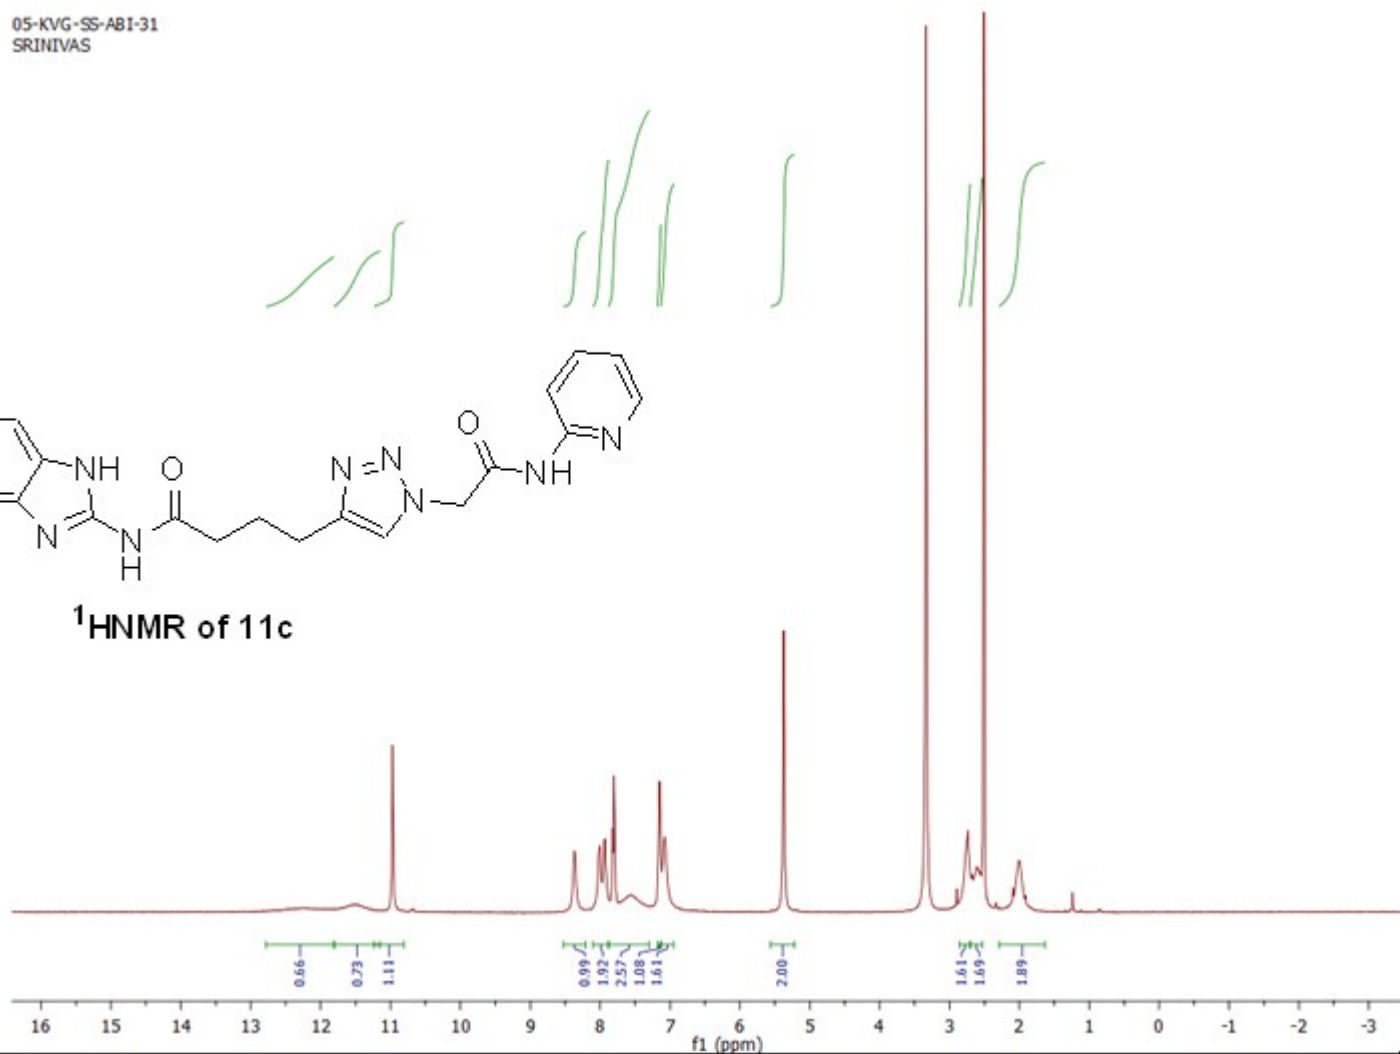

<sup>1</sup>HNMR of 11c

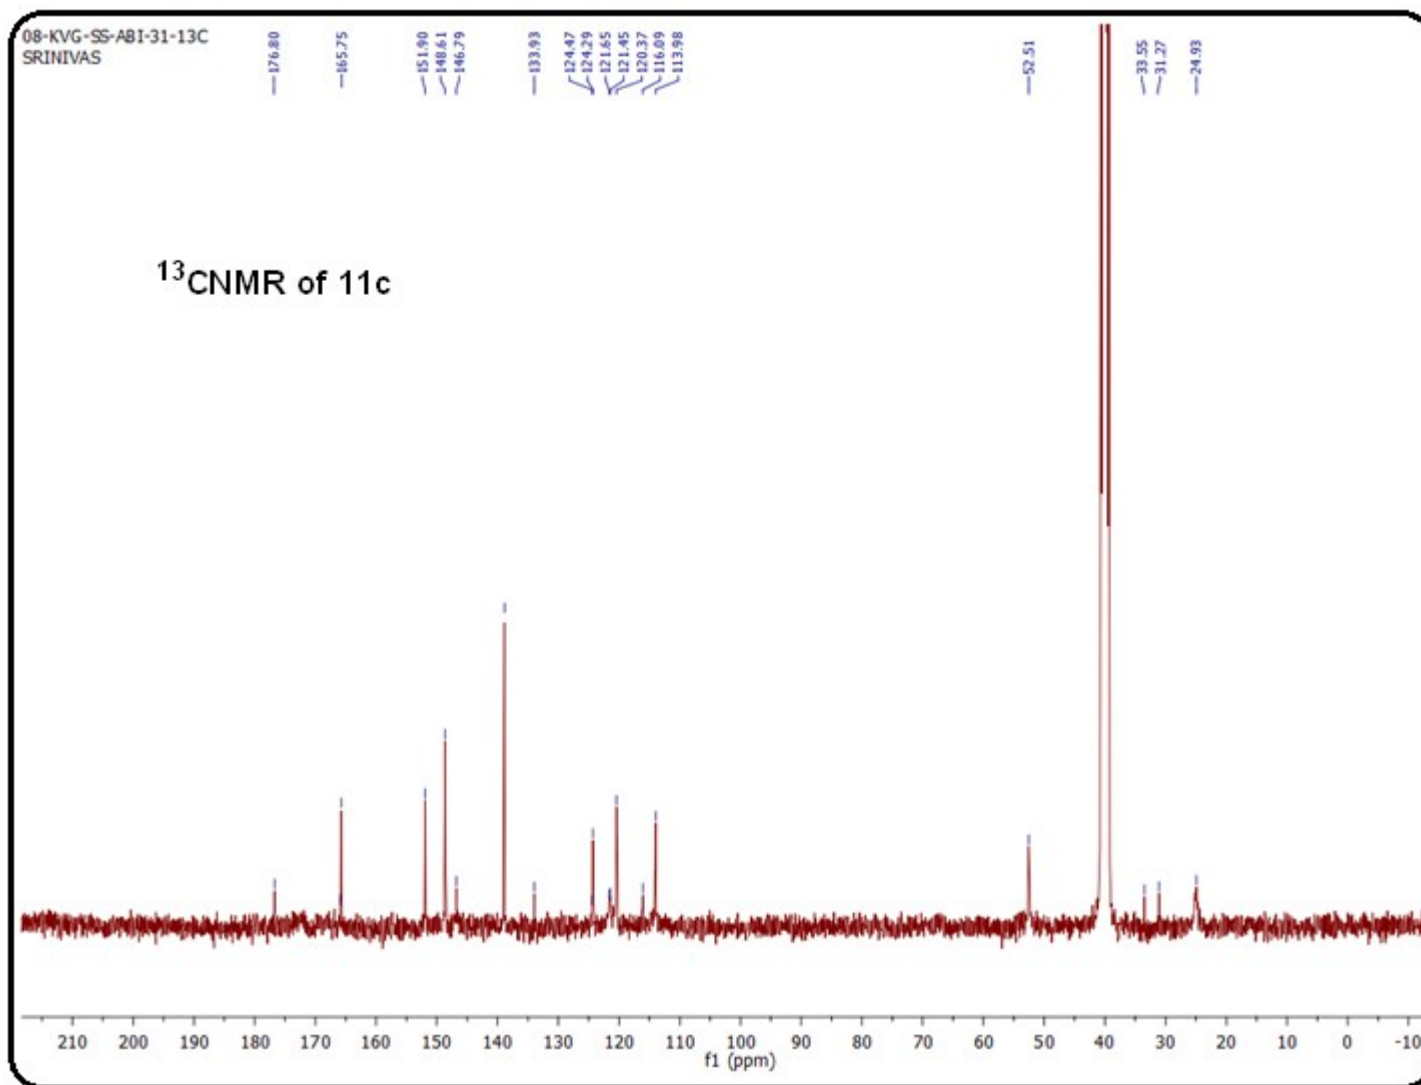

$^{13}\text{C}$ NMR of 11c

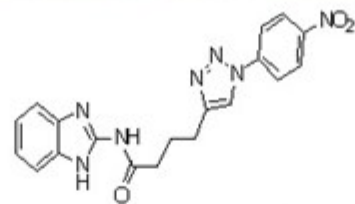

<sup>1</sup>HNMR of 11d

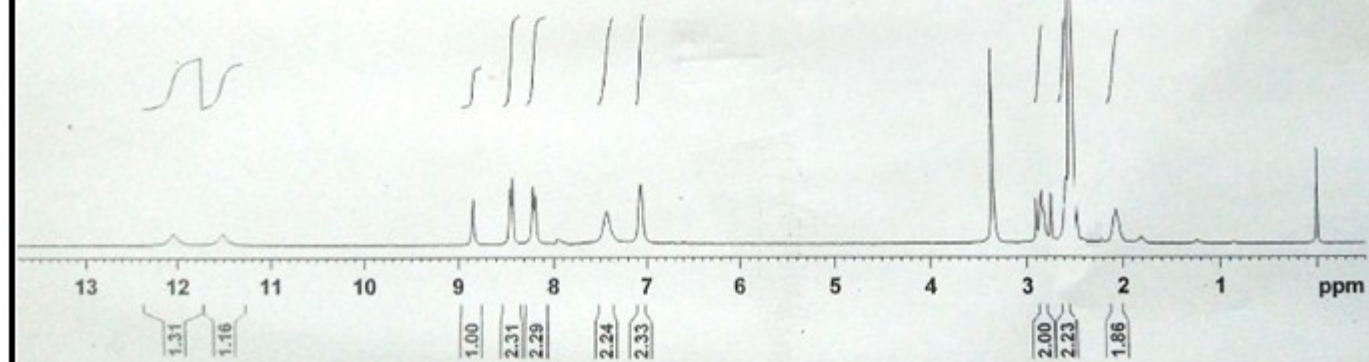

<sup>1</sup>HNMR of 11d

## 5. Mass spectra's

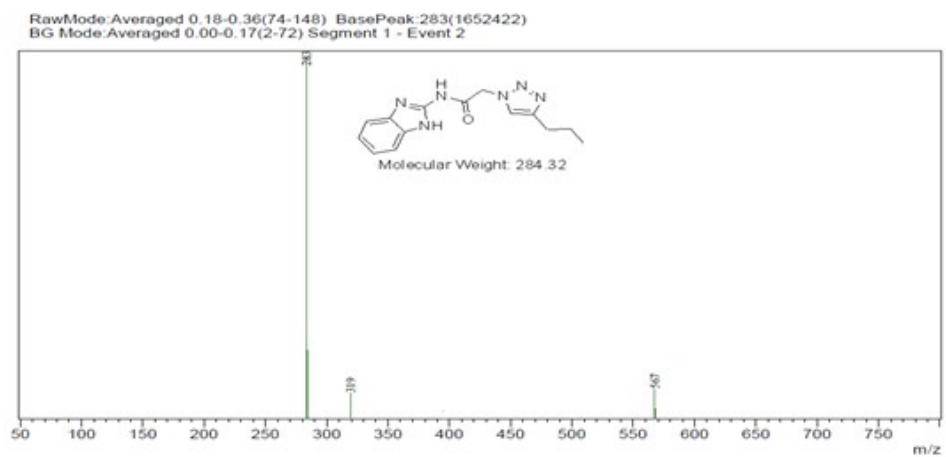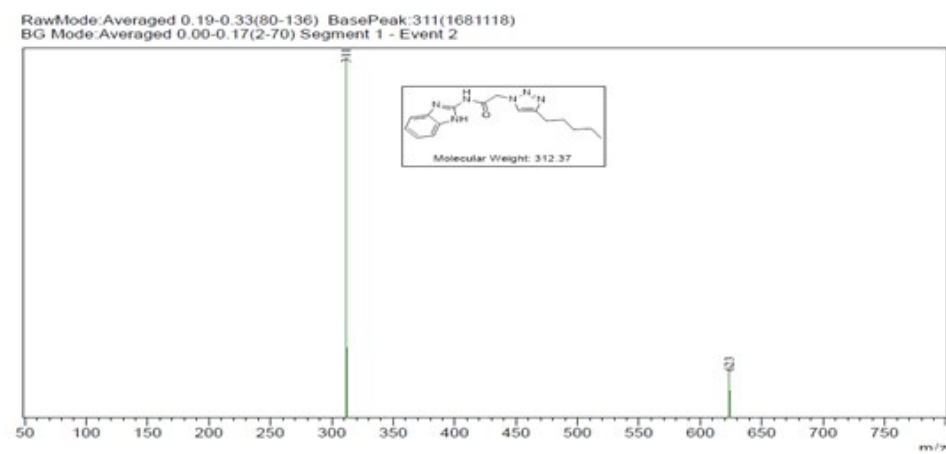

RawMode:Averaged 0.19-0.35(80-144) BasePeak:339(1204665)  
BG Mode:Averaged 0.00-0.18(2-74) Segment 1 - Event 2

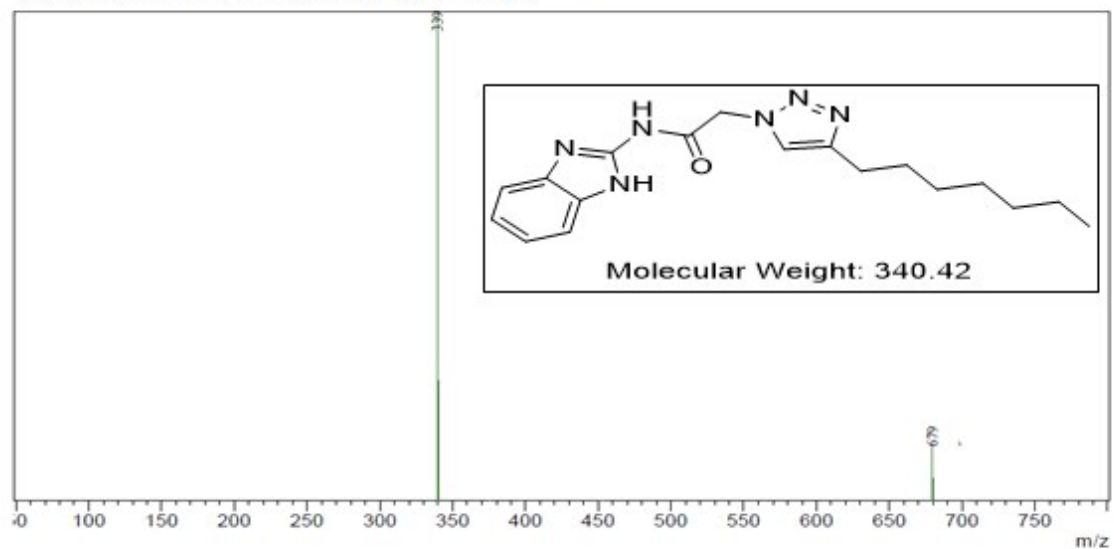

RawMode:Averaged 0.19-0.34(78-142) BasePeak:367(1270533)  
BG Mode:Averaged 0.00-0.17(2-72) Segment 1 - Event 2

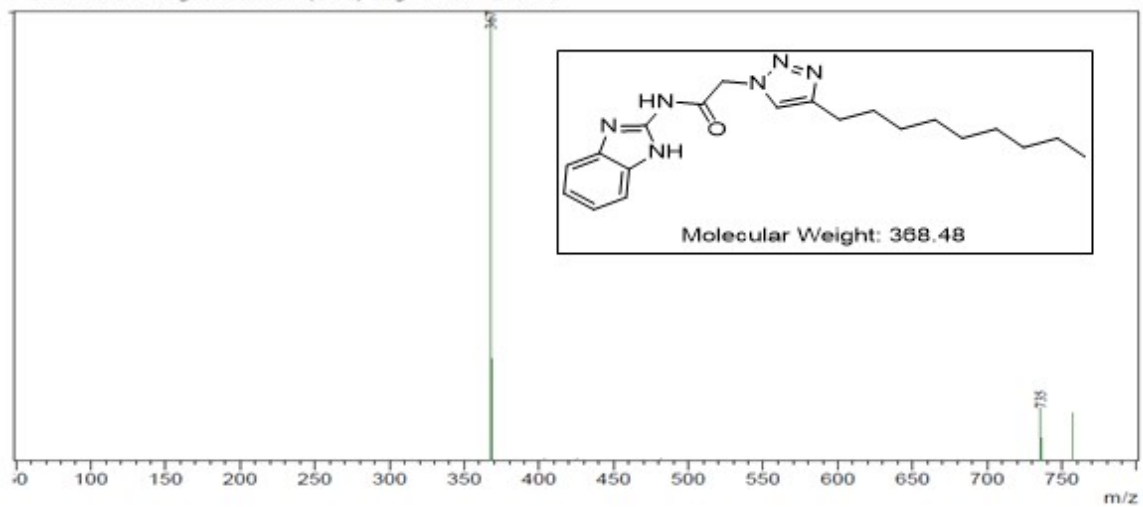

RawMode:Averaged 0.21-0.34(88-140) BasePeak:403(1622703)  
BG Mode:Averaged 0.00-0.15(2-62) Segment 1 - Event 2

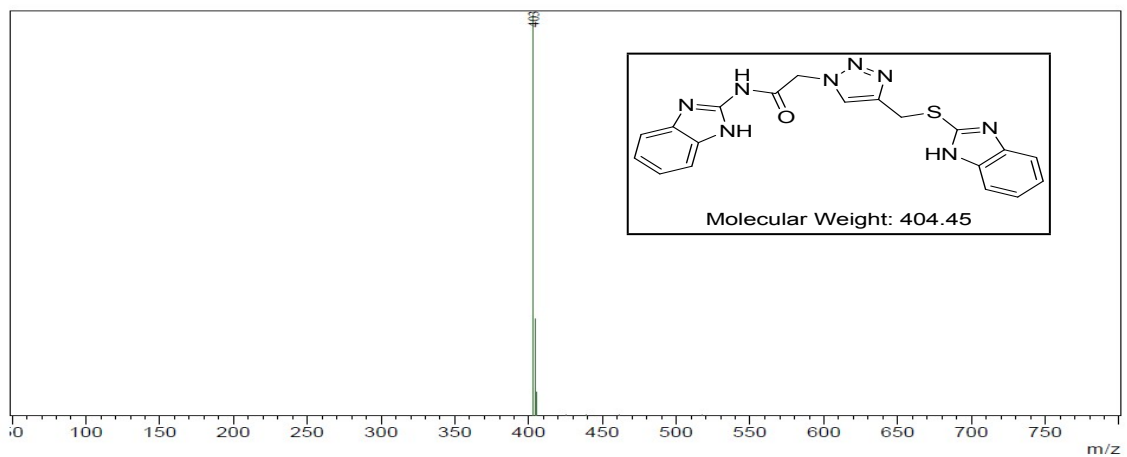

RawMode:Averaged 0.21-0.30(88-124) BasePeak:382(1086296)  
BG Mode:Averaged 0.00-0.18(2-74) Segment 1 - Event 2

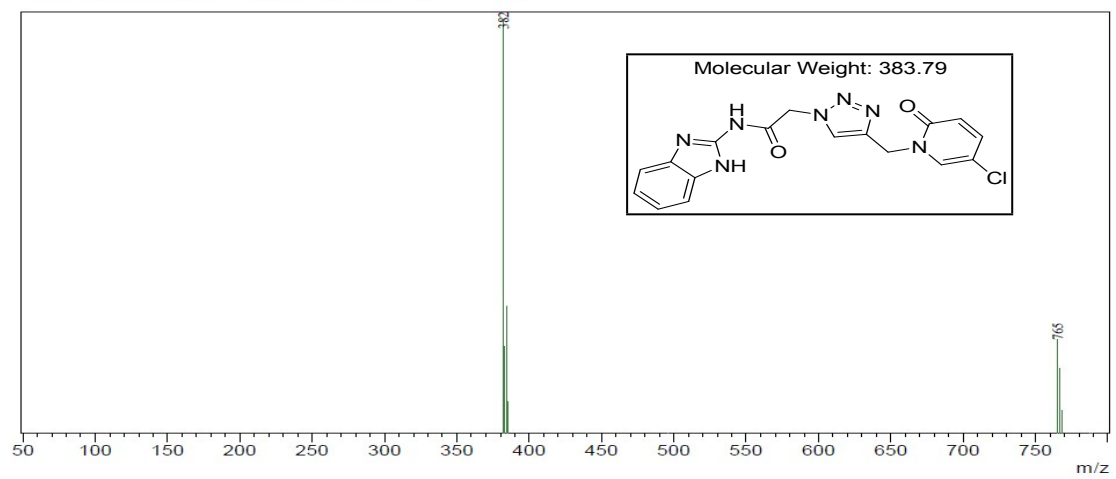



RawMode:Averaged 0.20-0.32(82-132) BasePeak:317(872668)  
BG Mode:Averaged 0.00-0.17(2-72) Segment 1 - Event 2

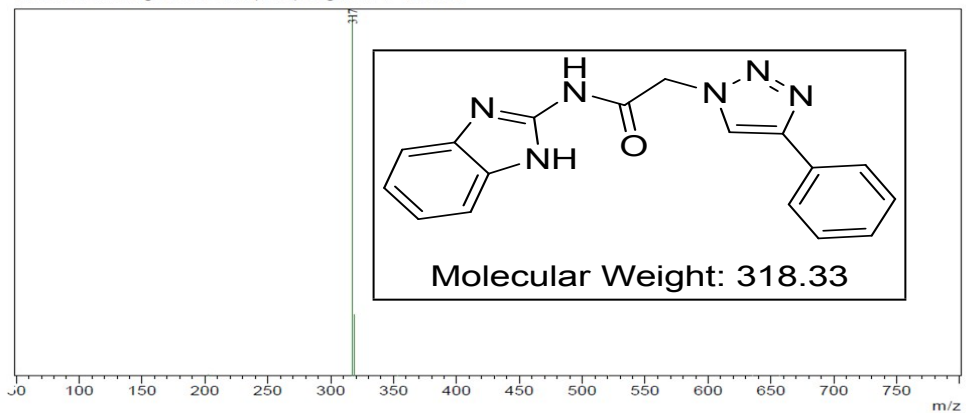

RawMode:Averaged 0.21-0.33(88-136) BasePeak:395(600430)  
BG Mode:Averaged 0.00-0.18(2-74) Segment 1 - Event 2

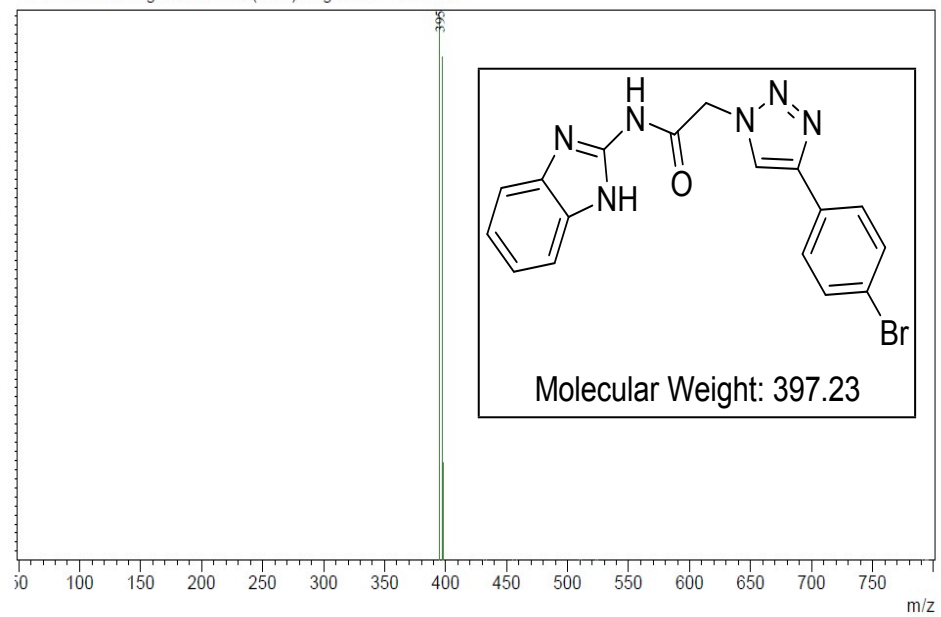

RawMode:Averaged 0.18-0.36(74-148) BasePeak:331(1422643)  
BG Mode:Averaged 0.00-0.17(2-72) Segment 1 - Event 2

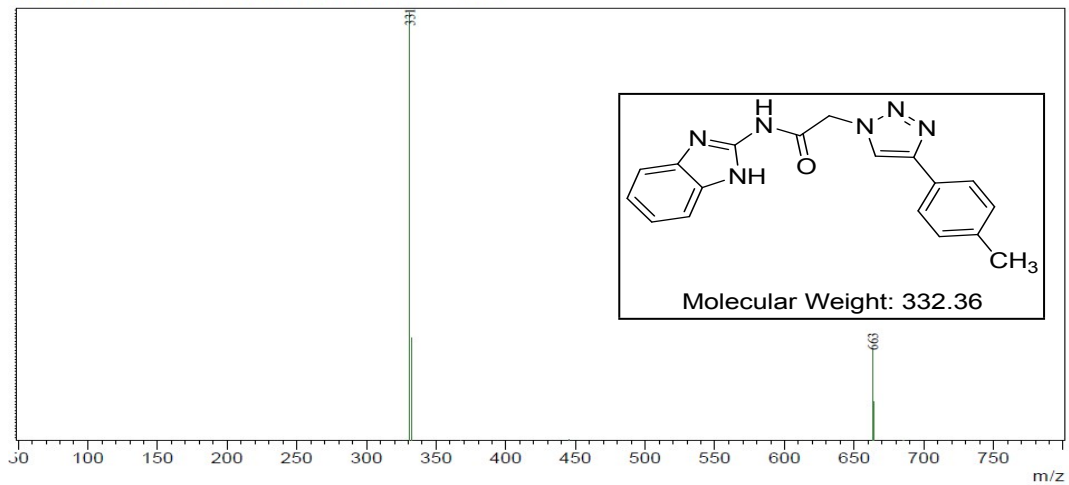

RawMode:Averaged 0.18-0.31(74-128) BasePeak:333(361269)  
BG Mode:Averaged 0.00-0.18(2-74) Segment 1 - Event 2

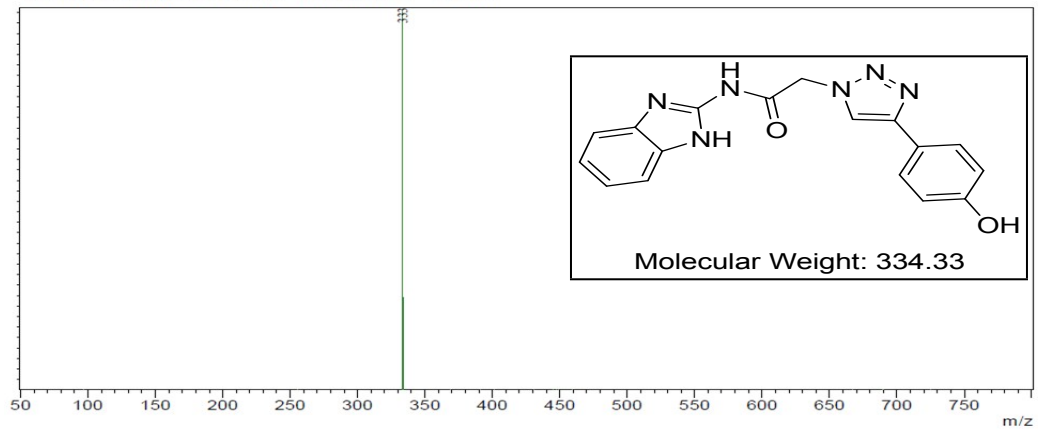

RawMode:Averaged 0.21-0.30(86-126) BasePeak:347(317596)  
BG Mode:Averaged 0.00-0.19(2-80) Segment 1 - Event 2

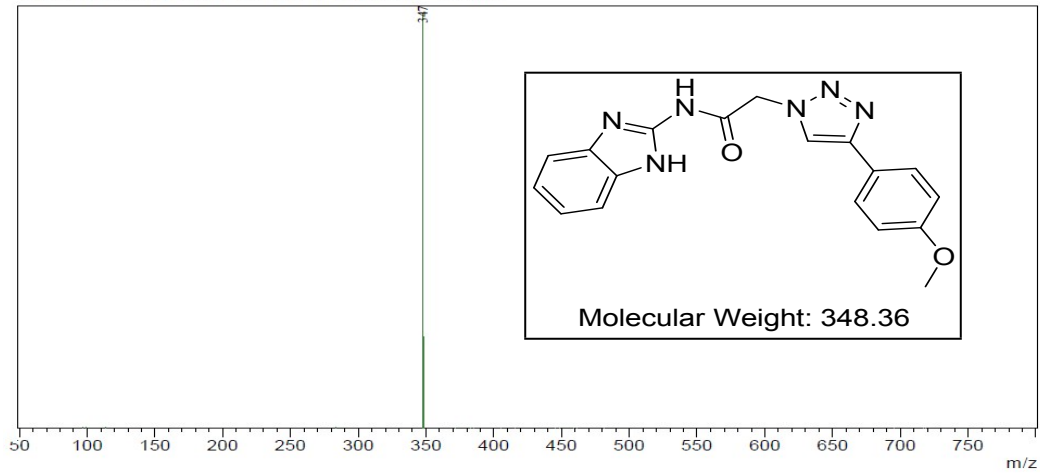

RawMode:Averaged 0.20-0.36(84-148) BasePeak:385(1836587)  
BG Mode:Averaged 0.00-0.17(2-70) Segment 1 - Event 2

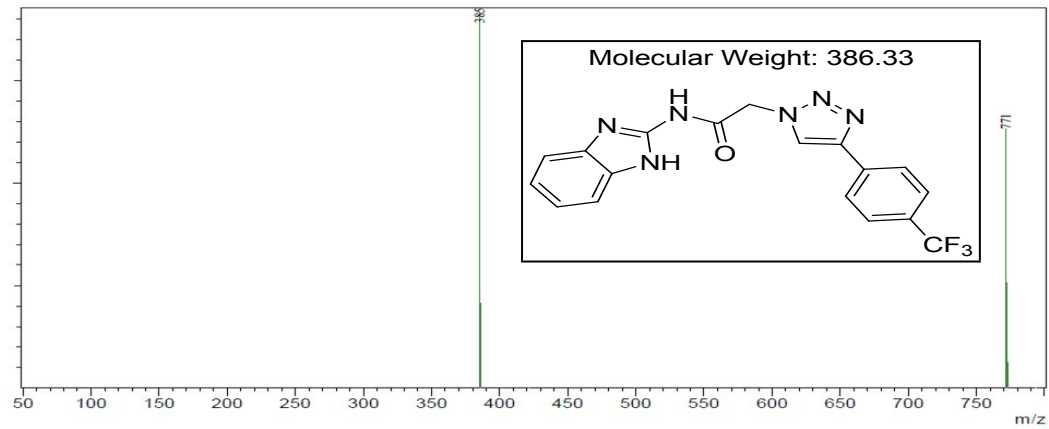

RawMode:Averaged 0.18-0.32(76-132) BasePeak:362(812196)  
BG Mode:Averaged 0.00-0.18(2-76) Segment 1 - Event 2

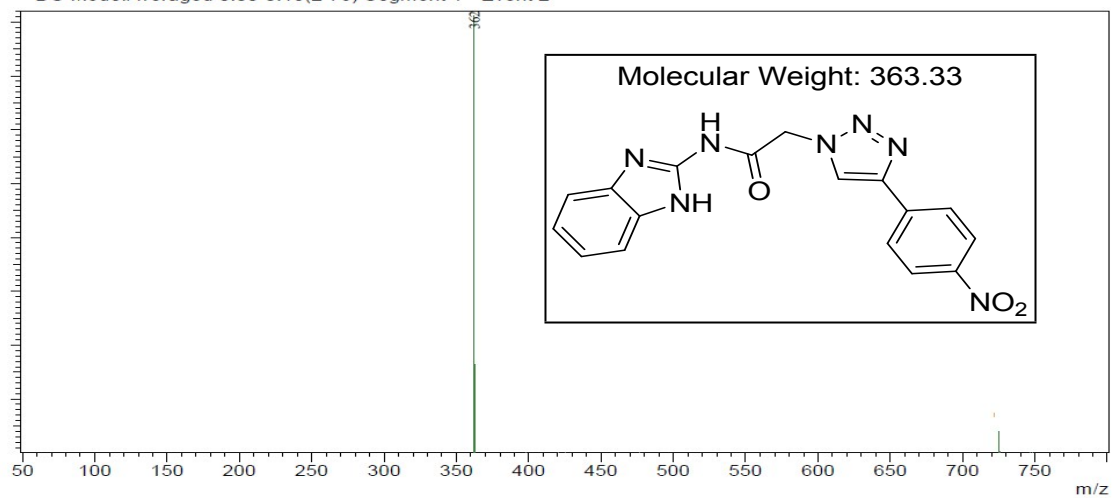

RawMode:Averaged 0.20-0.34(82-142) BasePeak:362(931700)  
BG Mode:Averaged 0.00-0.18(2-74) Segment 1 - Event 2

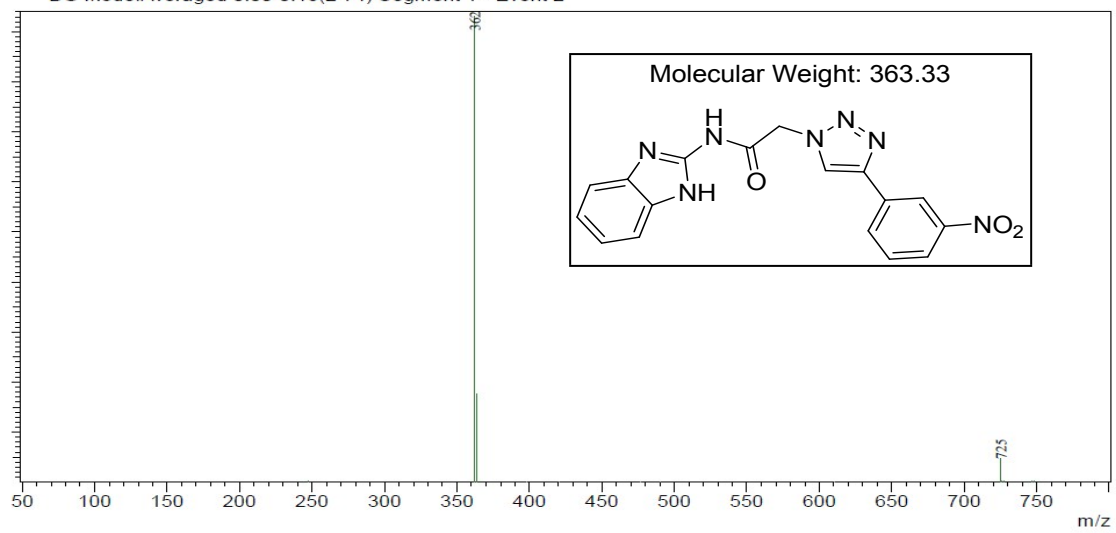

RawMode:Averaged 0.17-0.33(72-136) BasePeak:311(967323)  
BG Mode:Averaged 0.00-0.17(2-72) Segment 1 - Event 2

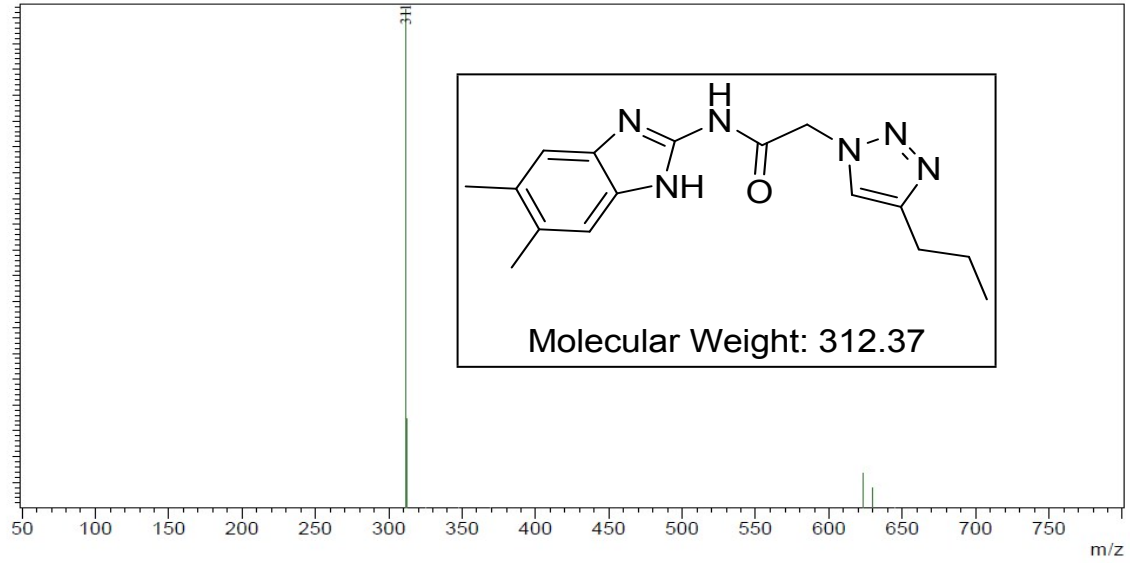

RawMode:Averaged 0.19-0.33(80-138) BasePeak:339(935055)  
BG Mode:Averaged 0.00-0.19(2-78) Segment 1 - Event 2

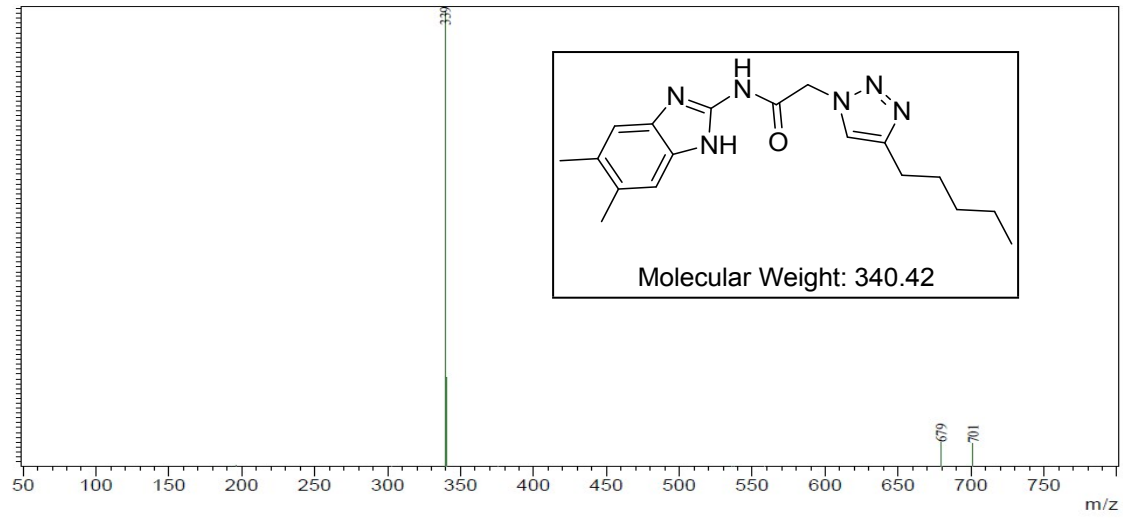

RawMode:Averaged 0.21-0.31(86-130) BasePeak:431(328445)  
BG Mode:Averaged 0.00-0.19(2-80) Segment 1 - Event 2

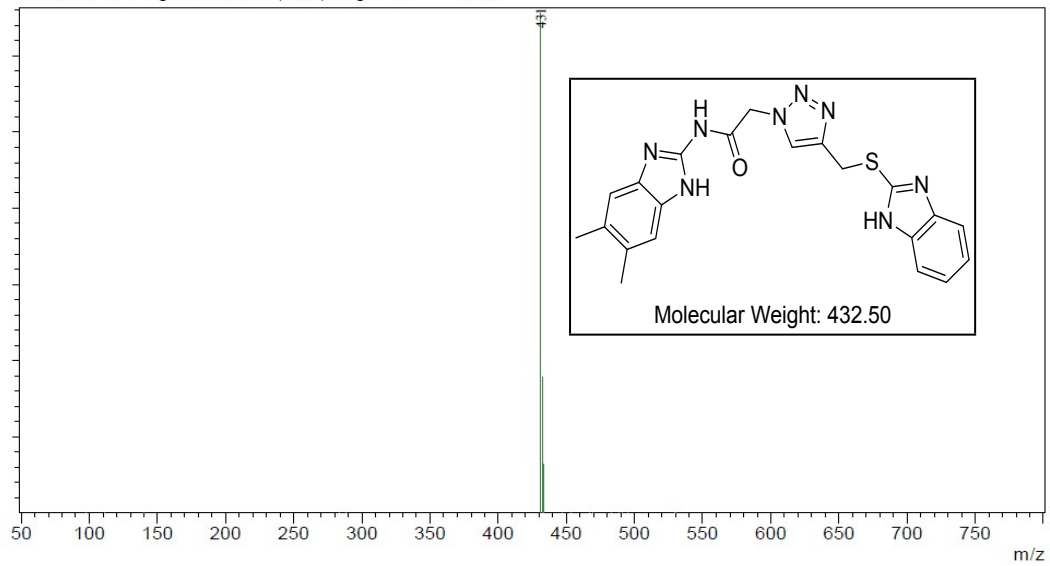

RawMode:Averaged 0.19-0.30(80-126) BasePeak:410(304680)  
BG Mode:Averaged 0.00-0.17(2-70) Segment 1 - Event 2

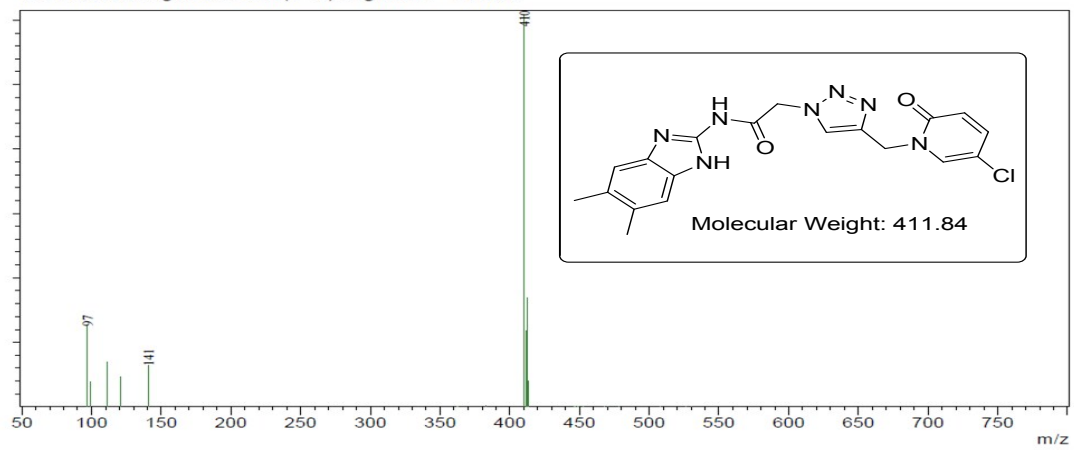

RawMode:Averaged 0.19-0.30(78-126) BasePeak:359(546060)  
BG Mode:Averaged 0.00-0.20(2-82) Segment 1 - Event 2

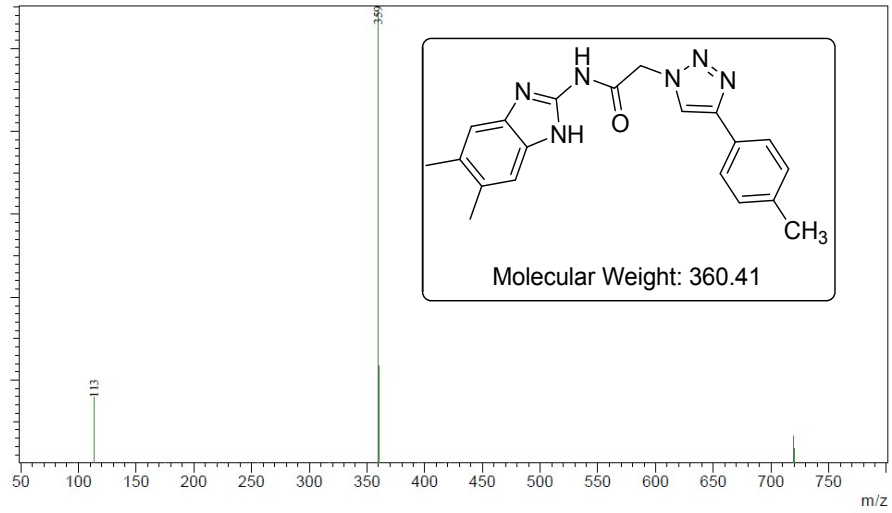

RawMode:Averaged 0.20-0.34(84-140) BasePeak:375(675470)  
BG Mode:Averaged 0.00-0.20(2-84) Segment 1 - Event 2

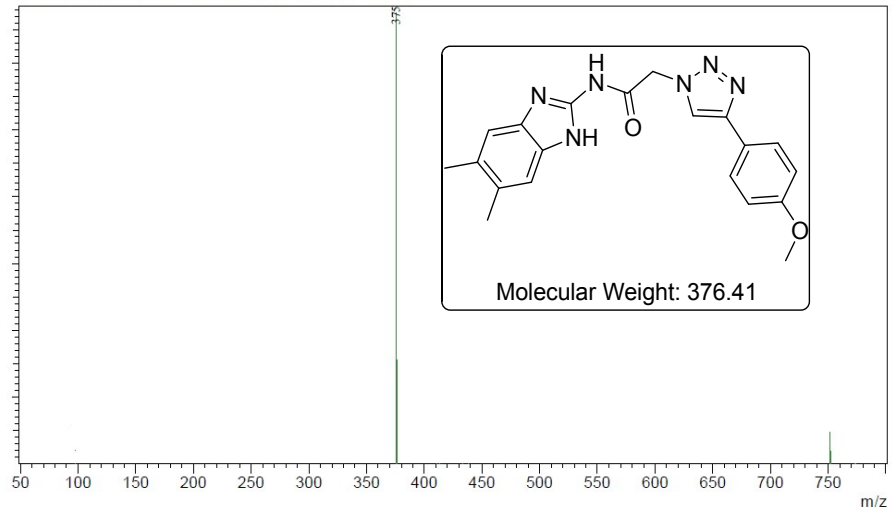

RawMode:Averaged 0.22-0.33(94-138) BasePeak:413(1014285)  
BG Mode:Averaged 0.00-0.19(2-80) Segment 1 - Event 2

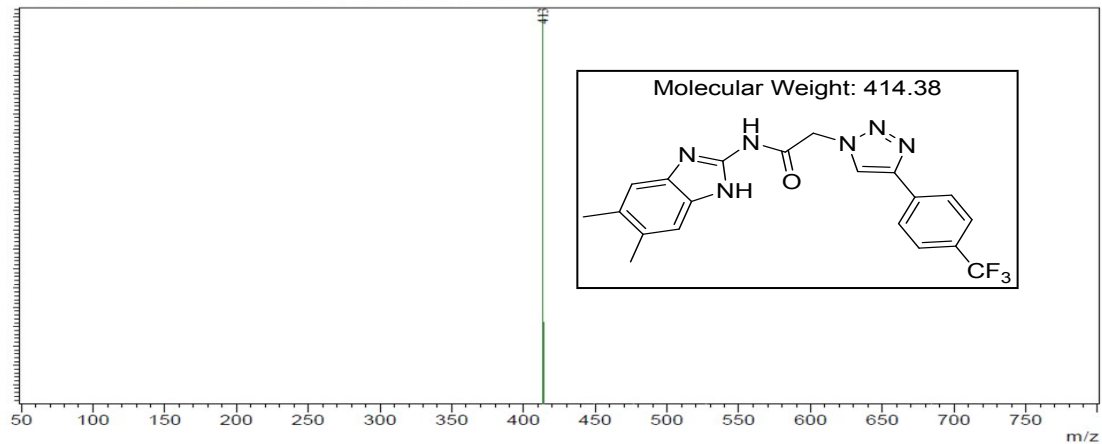

RawMode:Averaged 0.19-0.33(78-136) BasePeak:390(487706)  
BG Mode:Averaged 0.00-0.18(2-74) Segment 1 - Event 2

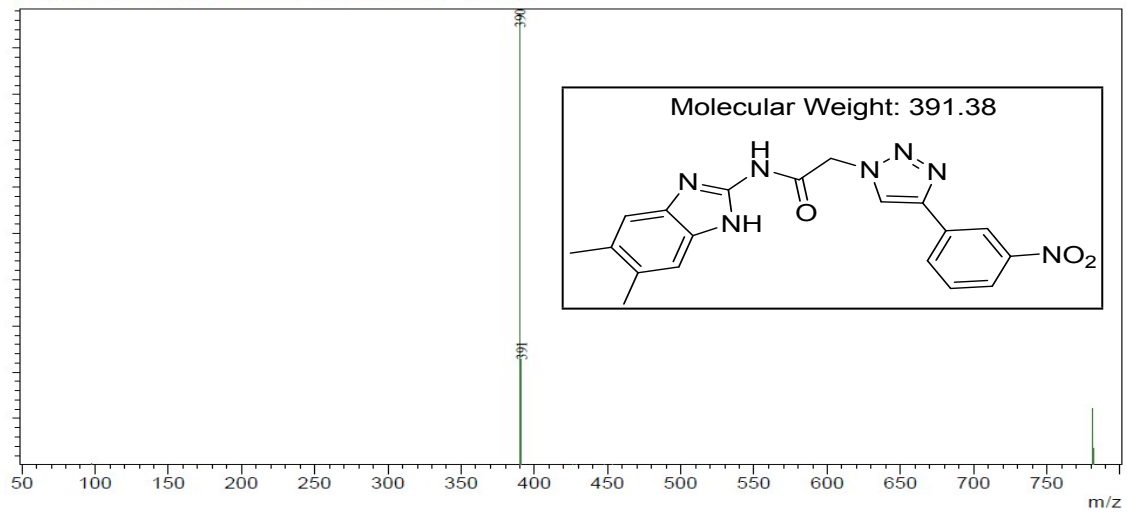



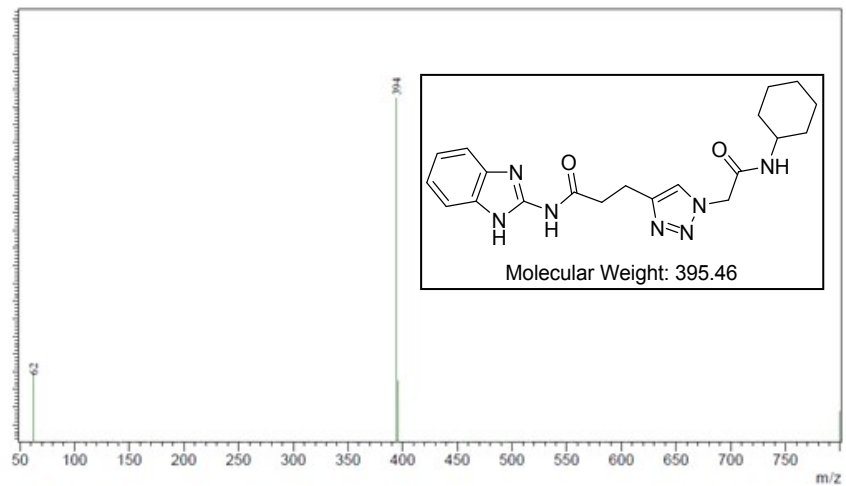

RawMode:Averaged 0.18-0.31(74-128) BasePeak:389(271223)  
BG Mode:Averaged 0.00-0.20(2-84) Segment 1 - Event 2

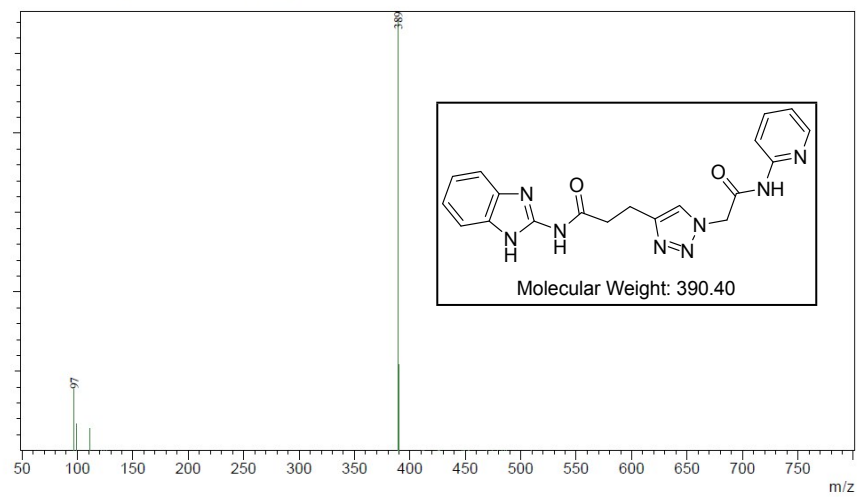

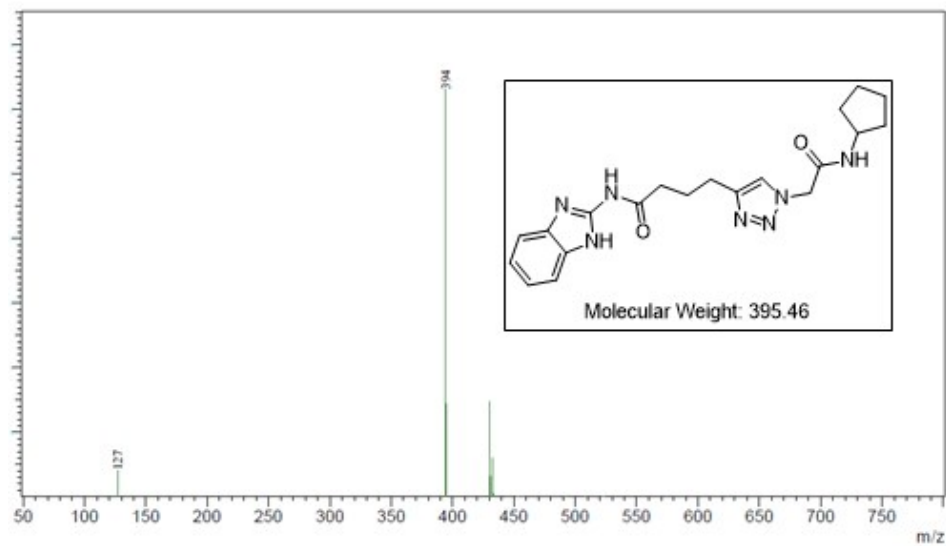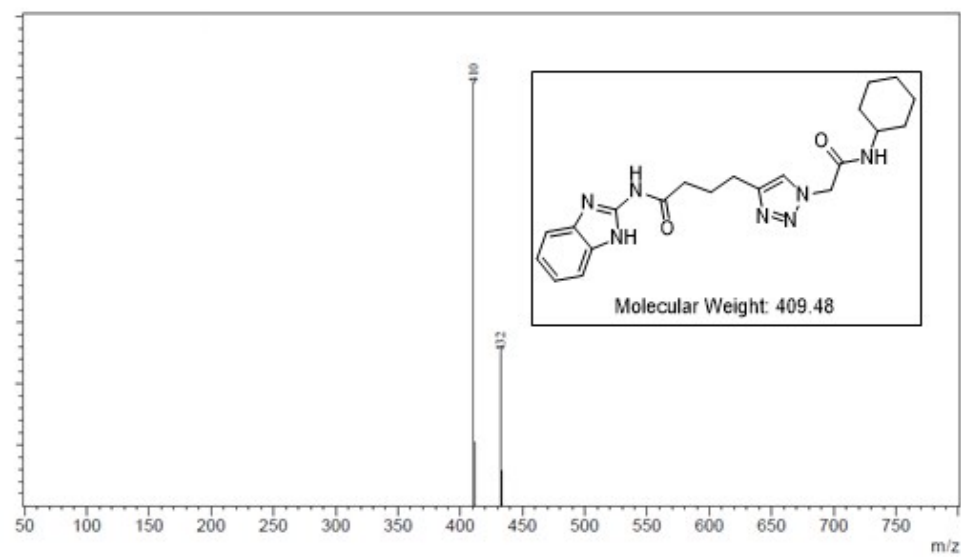

RawMode:Averaged 0.22-0.35(92-146) BasePeak:422(611542)  
BG Mode:Averaged 0.00-0.19(2-80) Segment 1 - Event 2

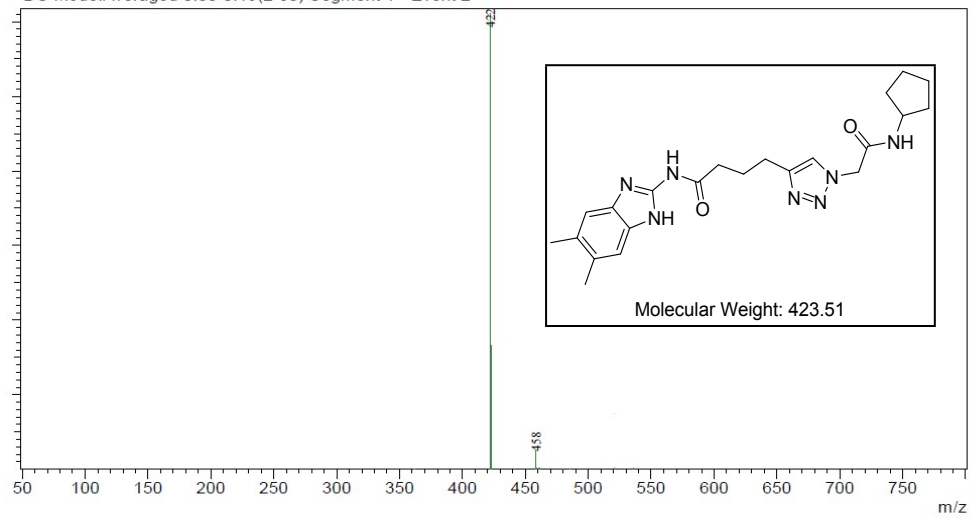

RawMode:Averaged 0.17-0.33(72-138) BasePeak:431(386073)  
BG Mode:Averaged 0.00-0.19(2-78) Segment 1 - Event 2

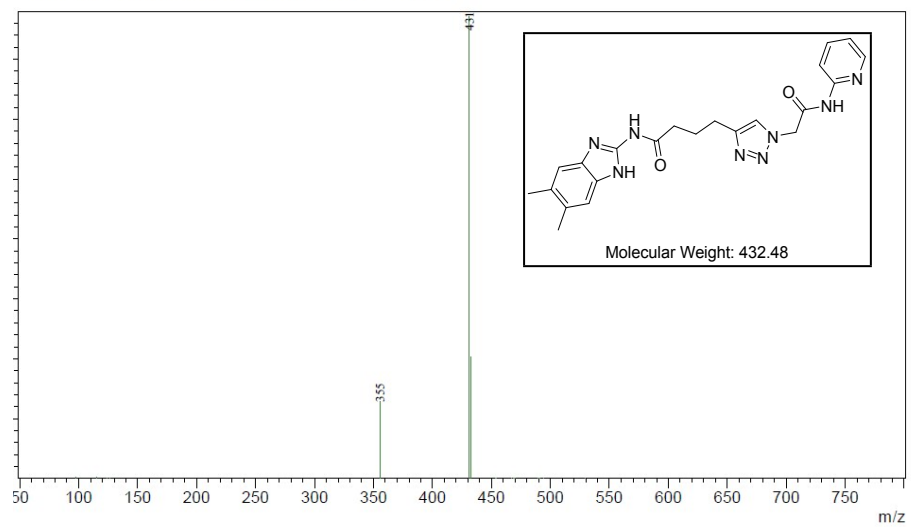

Supplement: c9ra05059k1.pdf [file c9ra05059k1.pdf]
